# Supplementary material
Source: PubMed Central journal article supplement (PMC7597375)

# HPLC chromatogram, MALDI-MS and NMR spectra of the products are from below

## 1a. A2G0-Asn-Fmoc

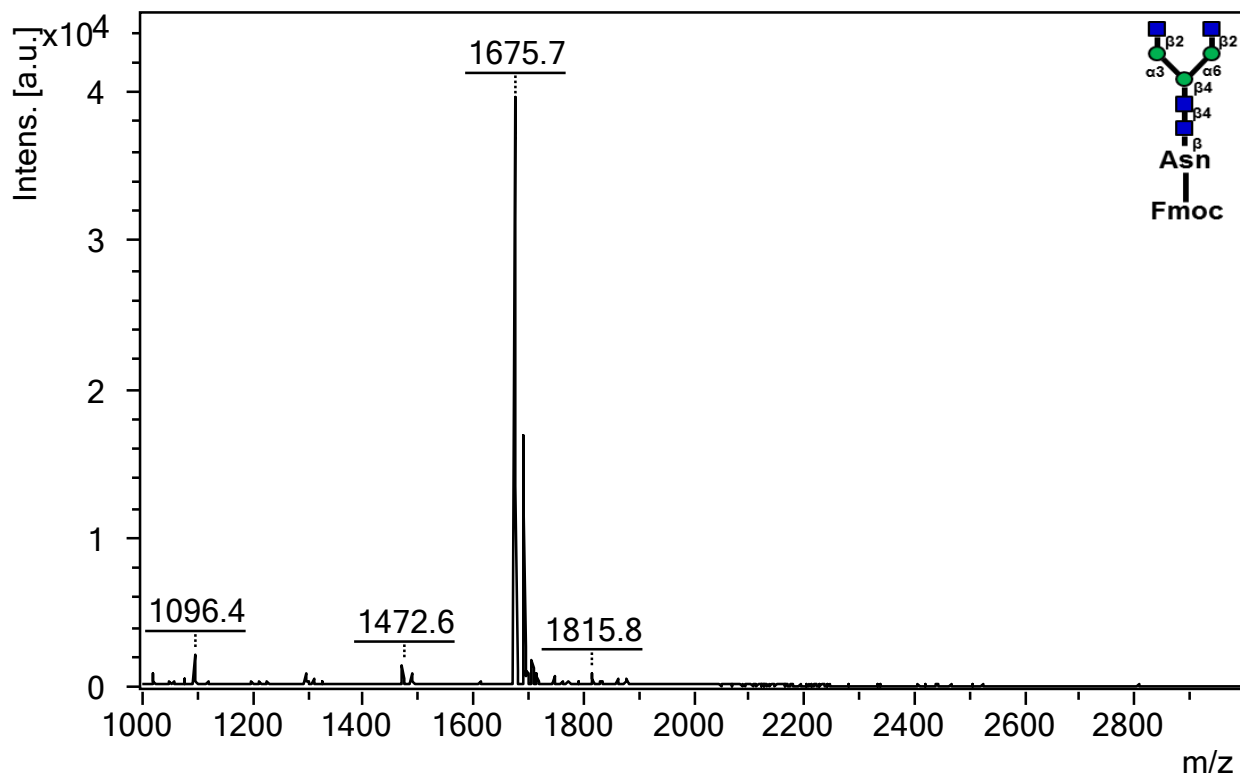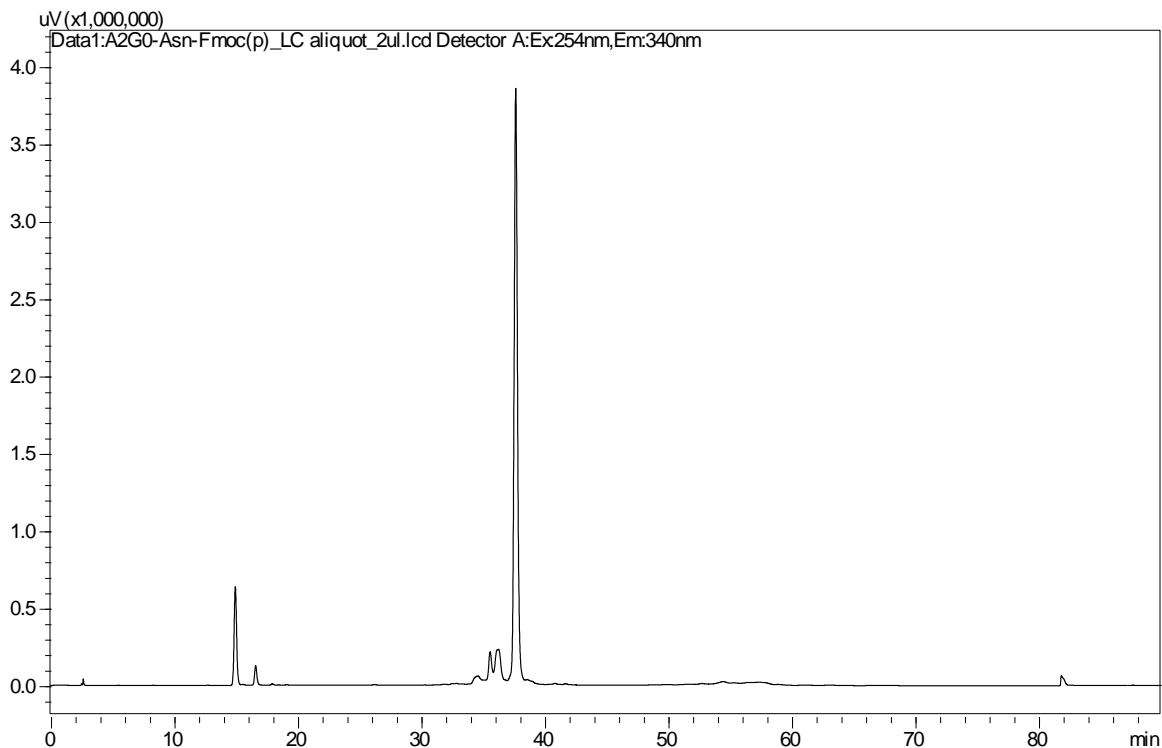

## 2a. 224A3G0-Asn-Fmoc

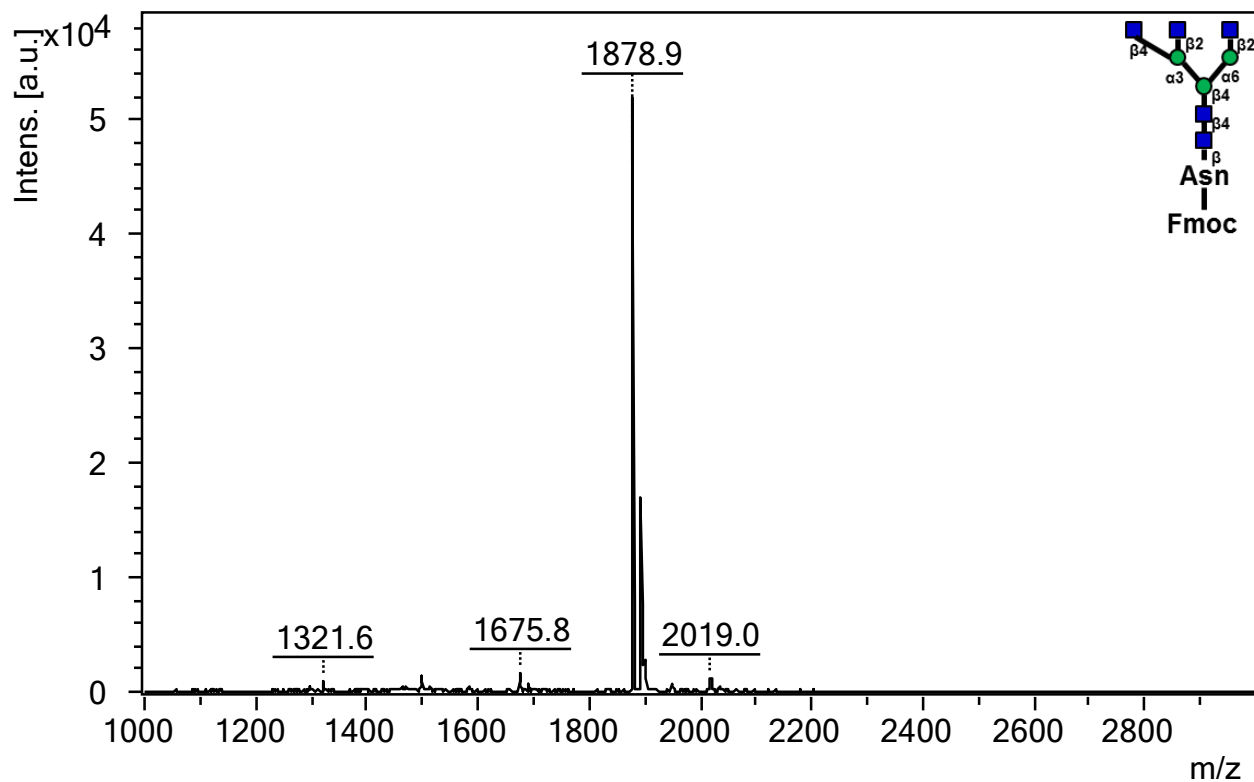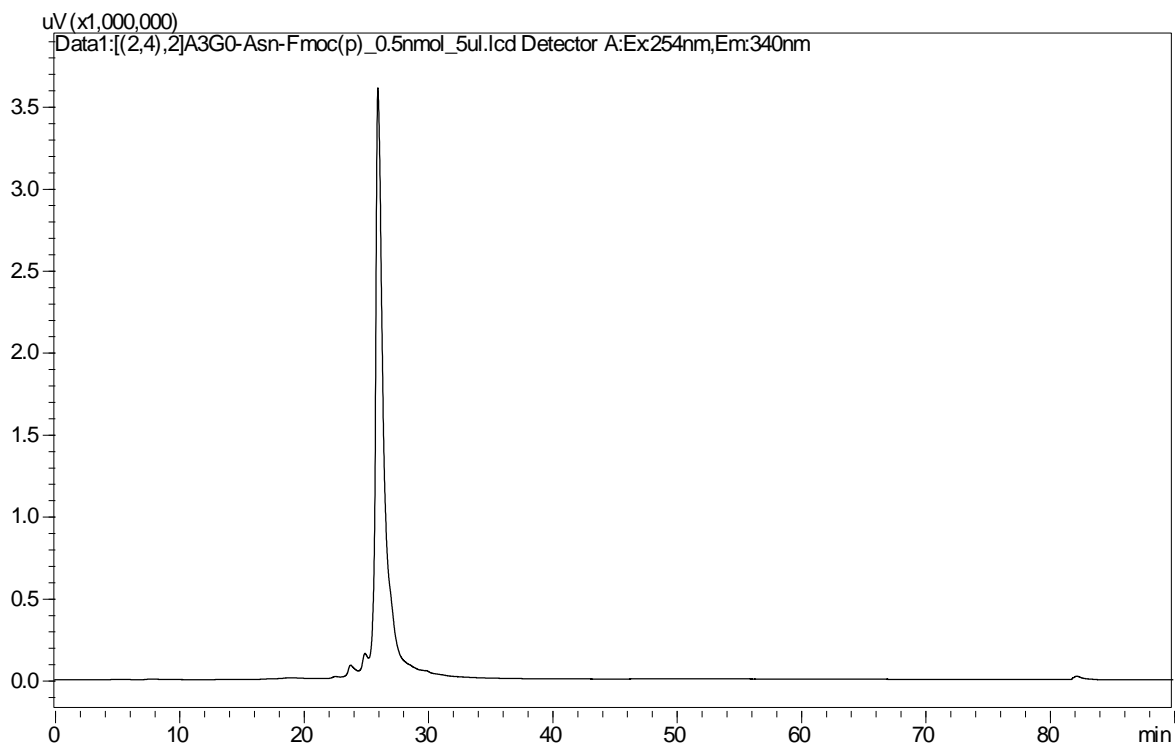

### 3a. 226A3G0-Asn-Fmoc

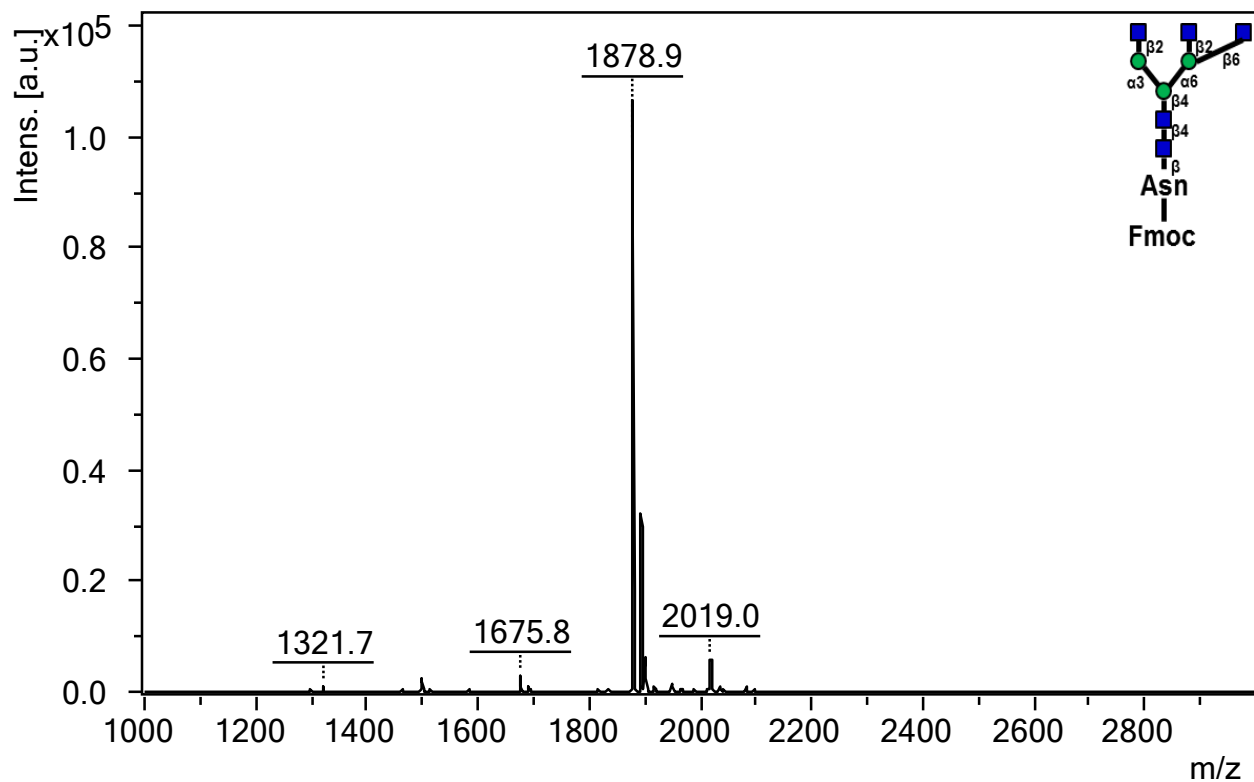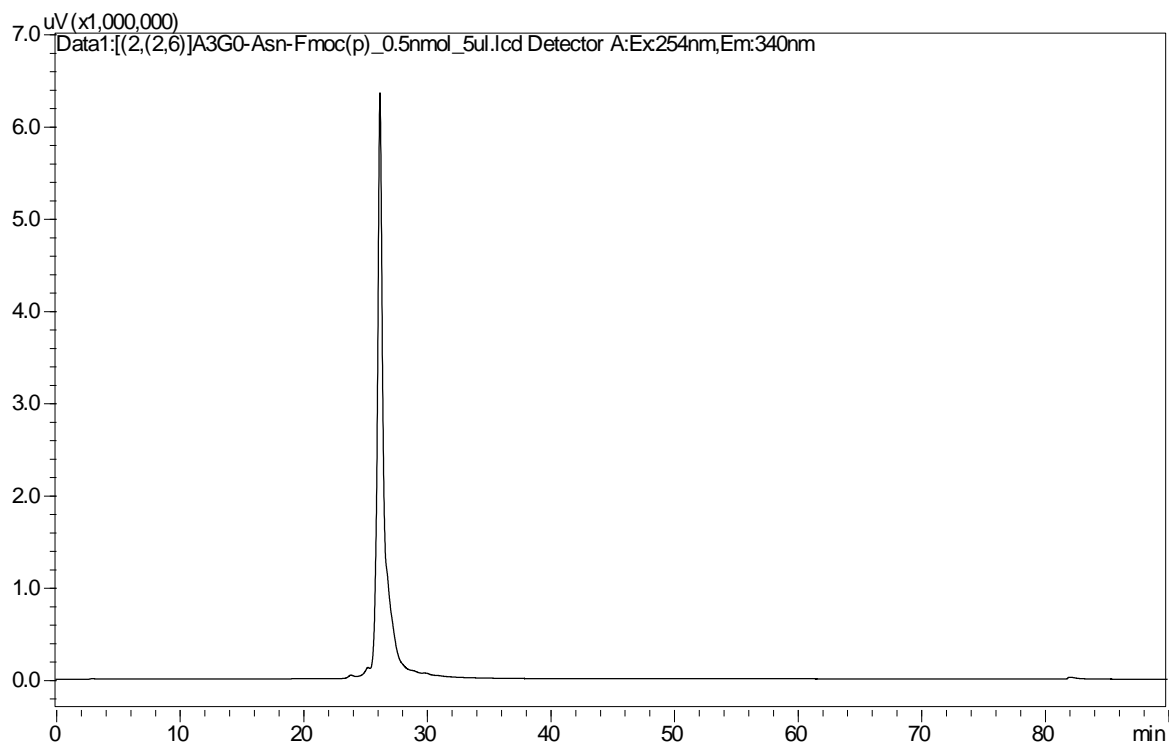

### 4a. A4G0-Asn-Fmoc

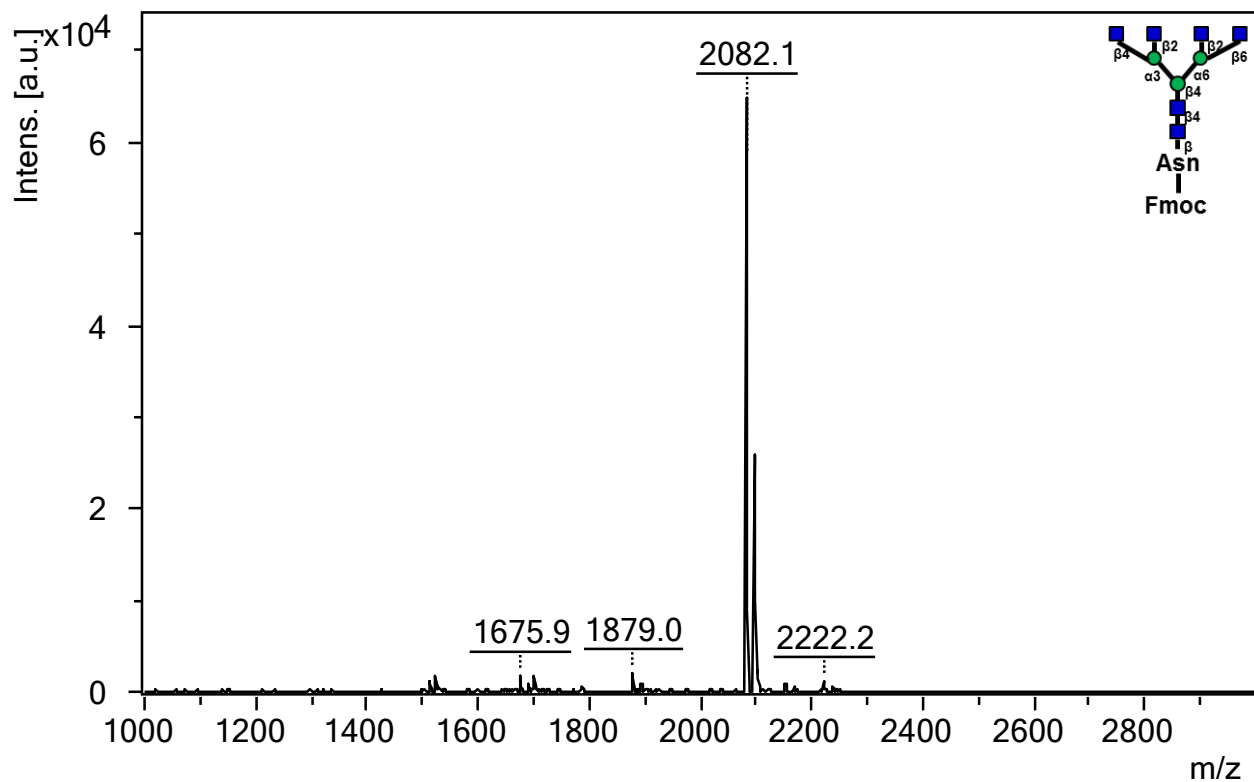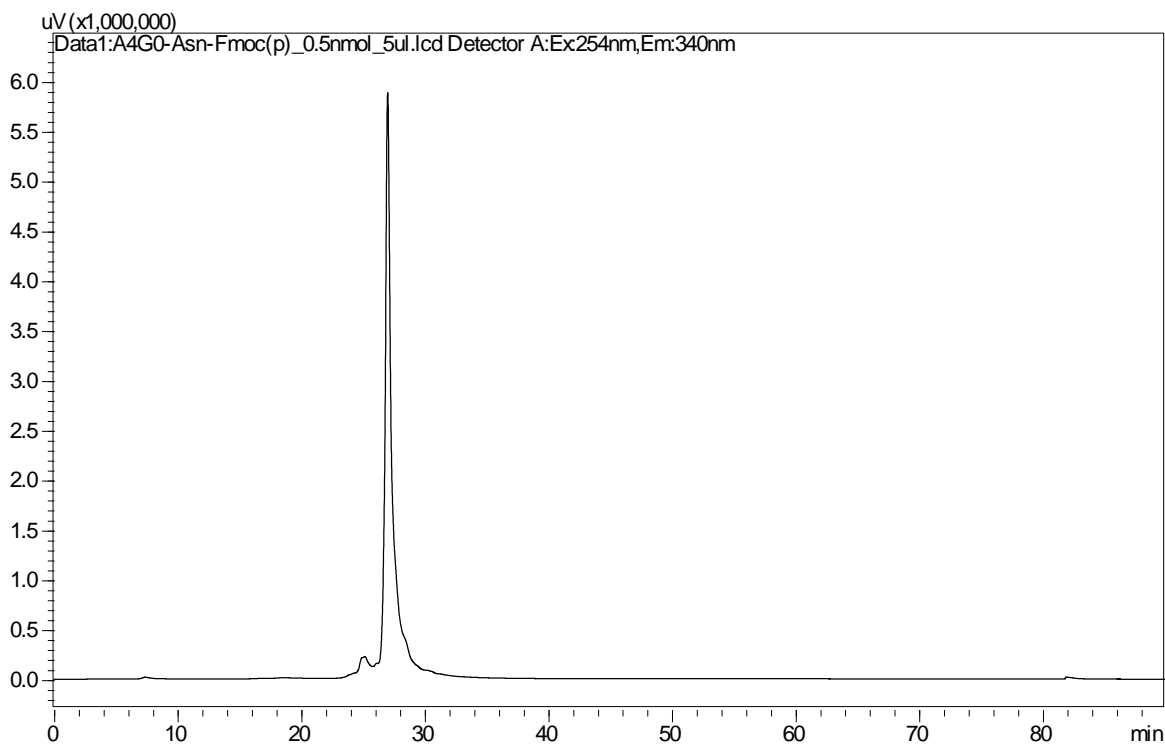

# 5a. A2G0F-Asn-Fmoc

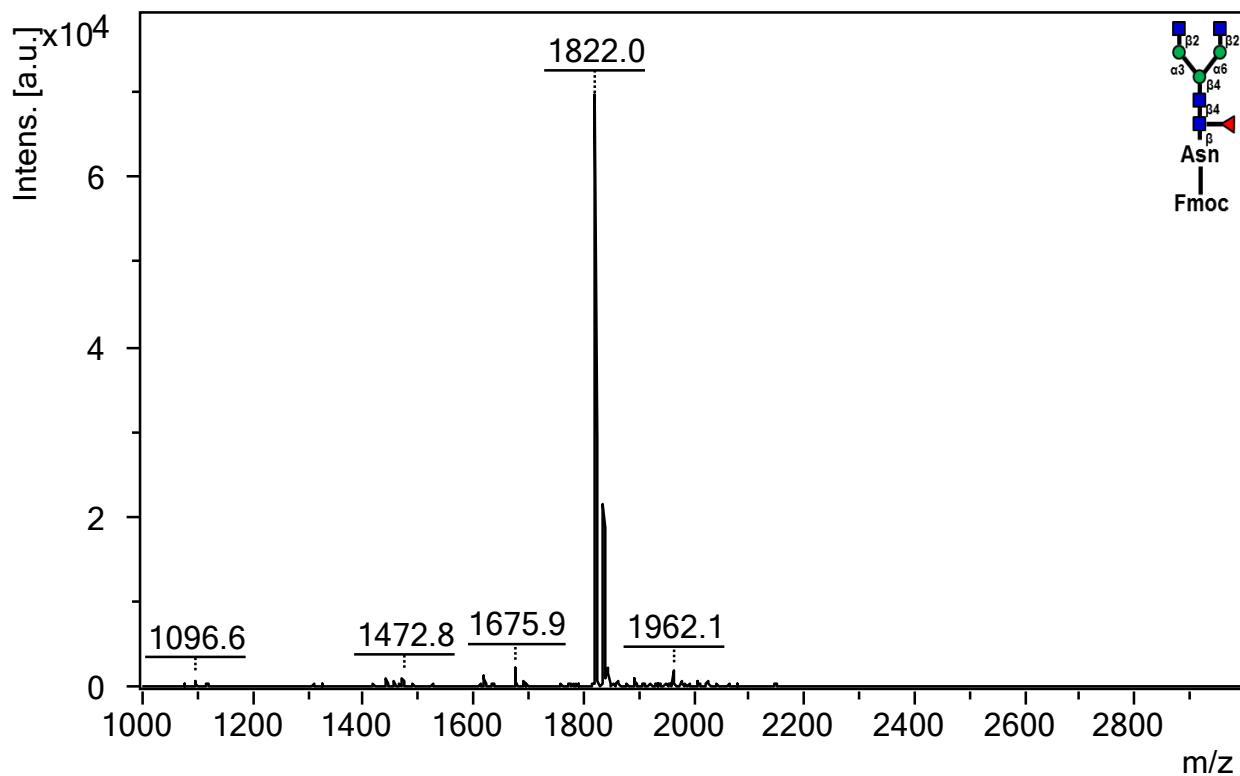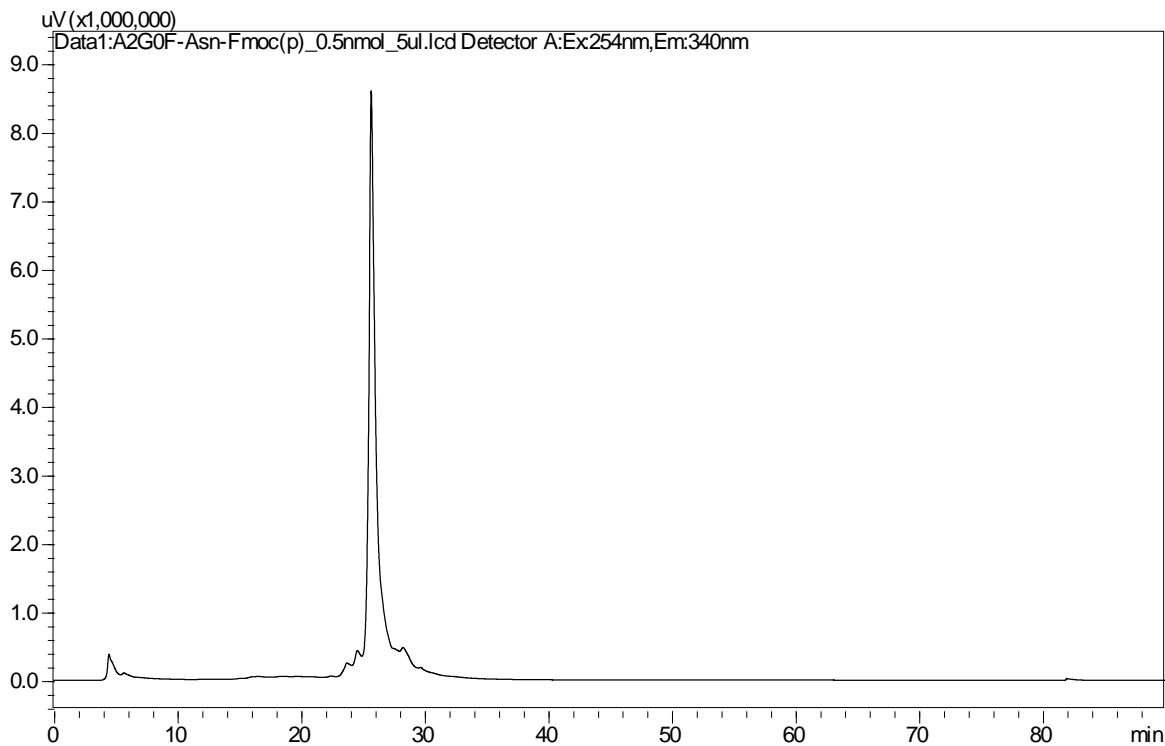

# 6a. 224A3G0F-Asn-Fmoc

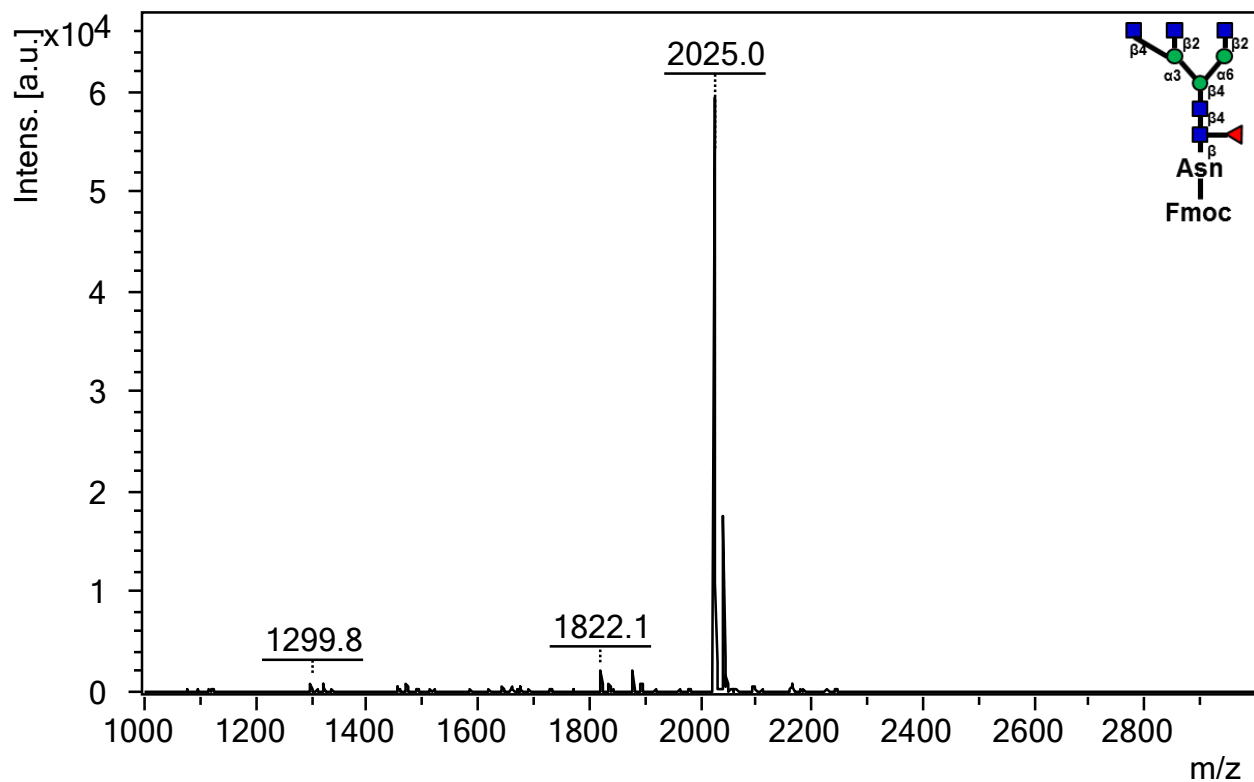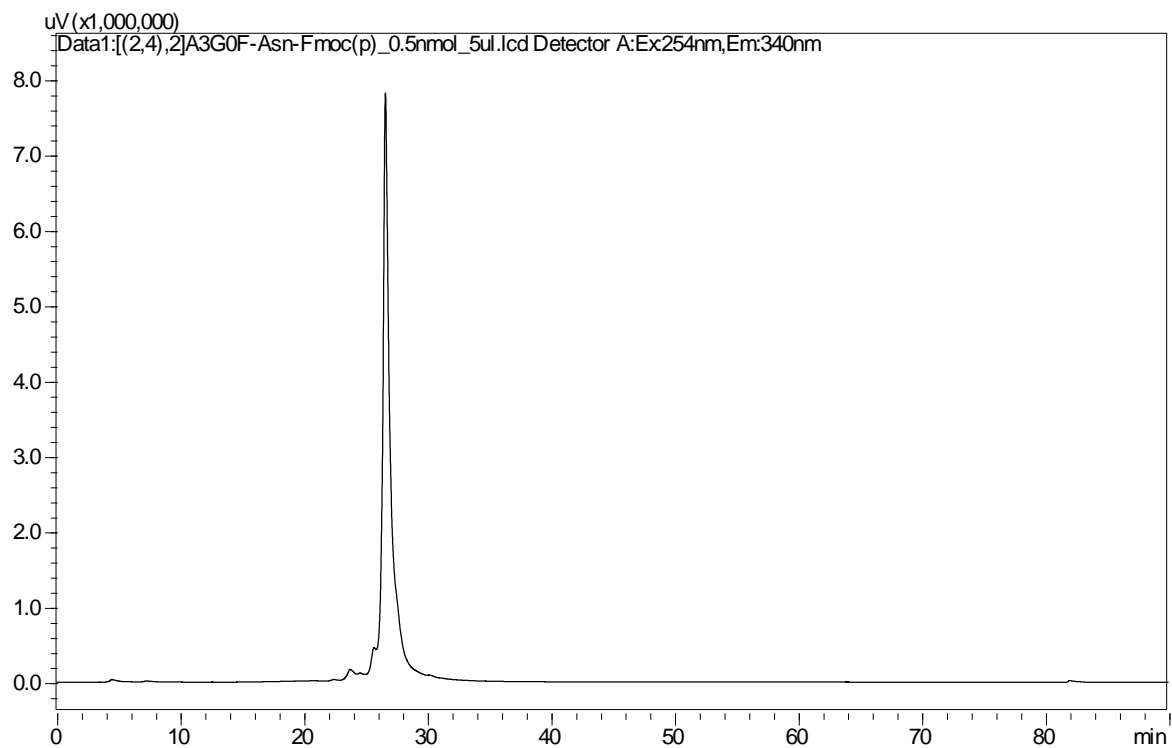

# 7a. 226A3G0F-Asn-Fmoc

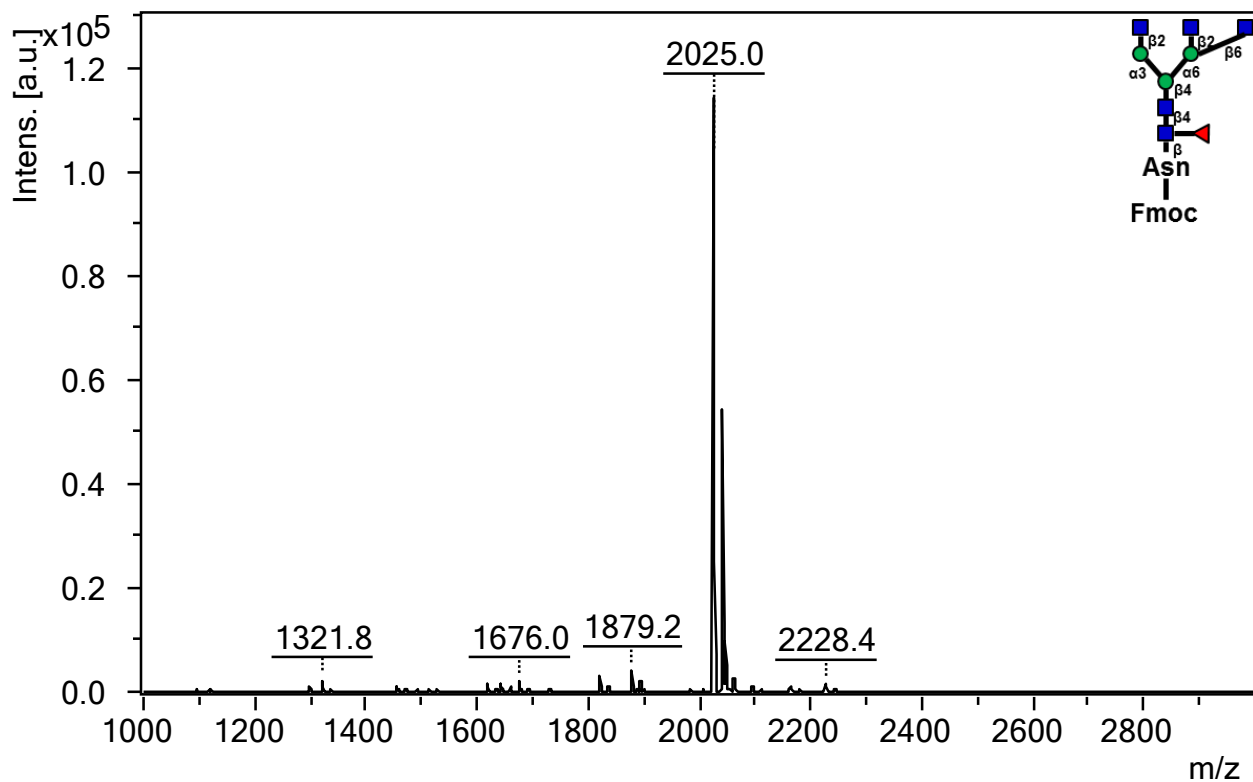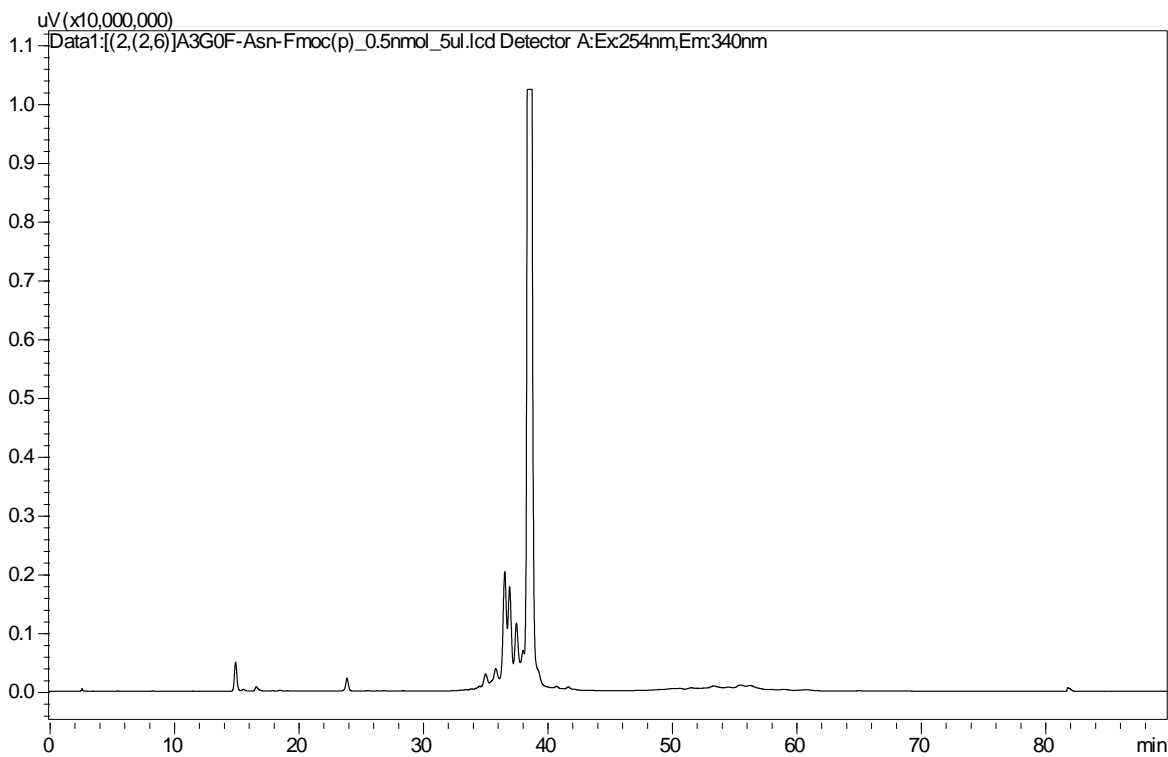

# 8a. A4G0F-Asn-Fmoc

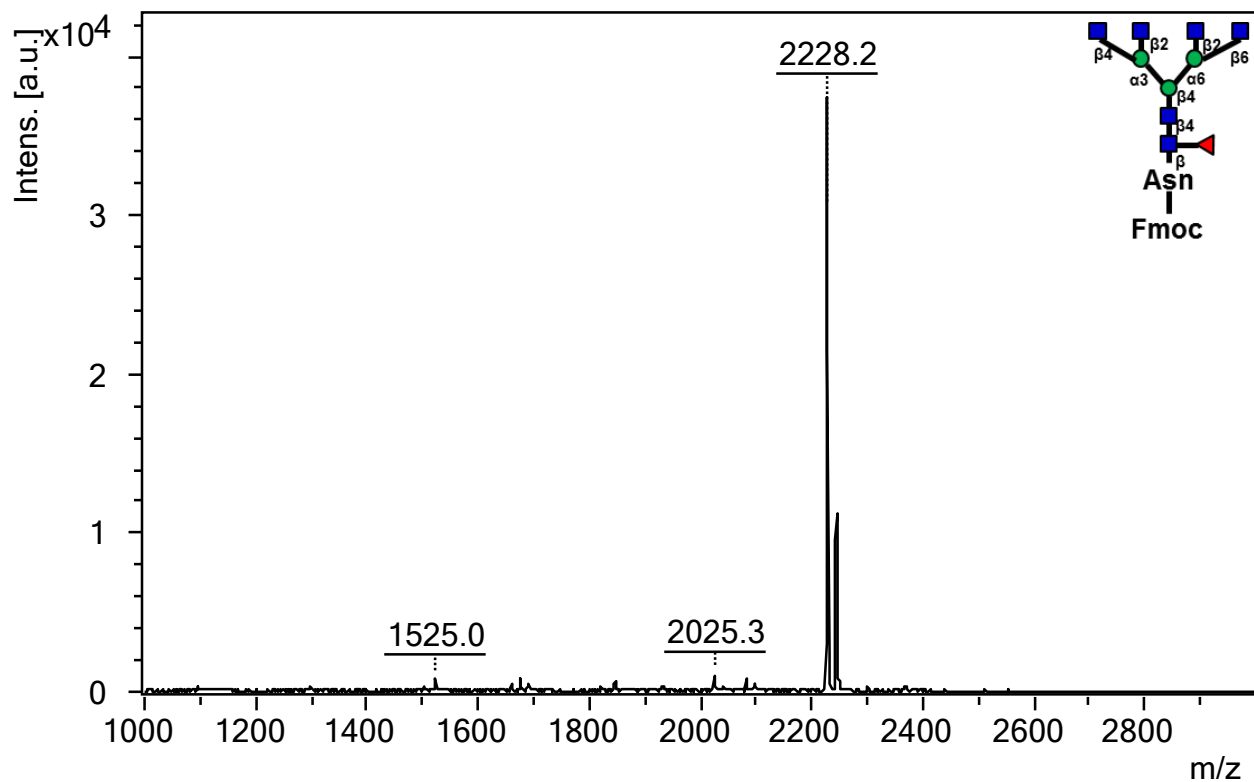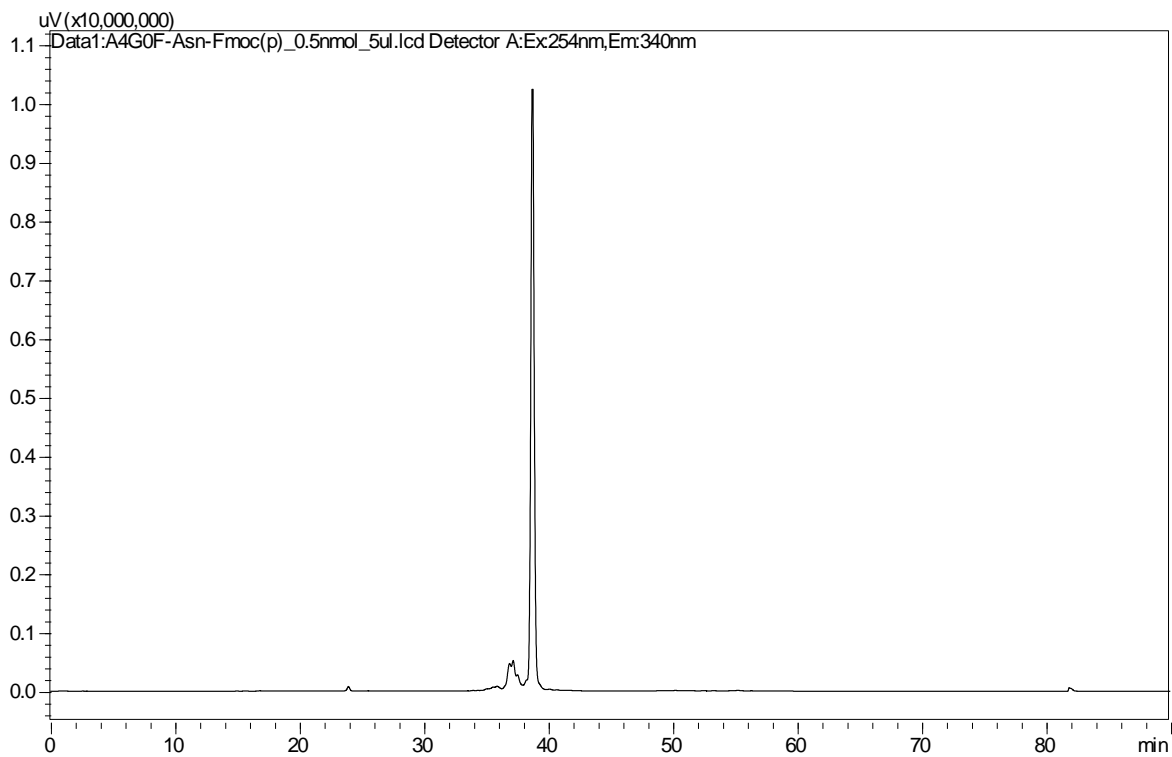



# 9a. A2G2-Asn-Fmoc

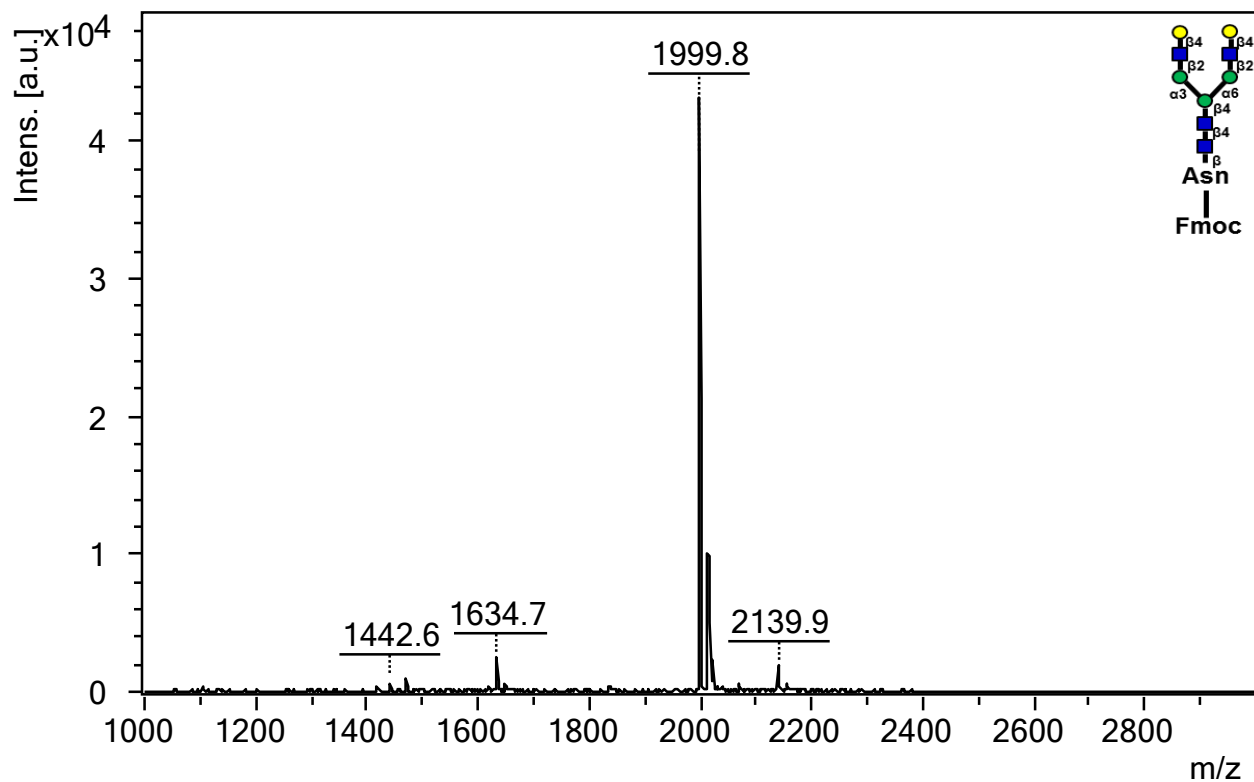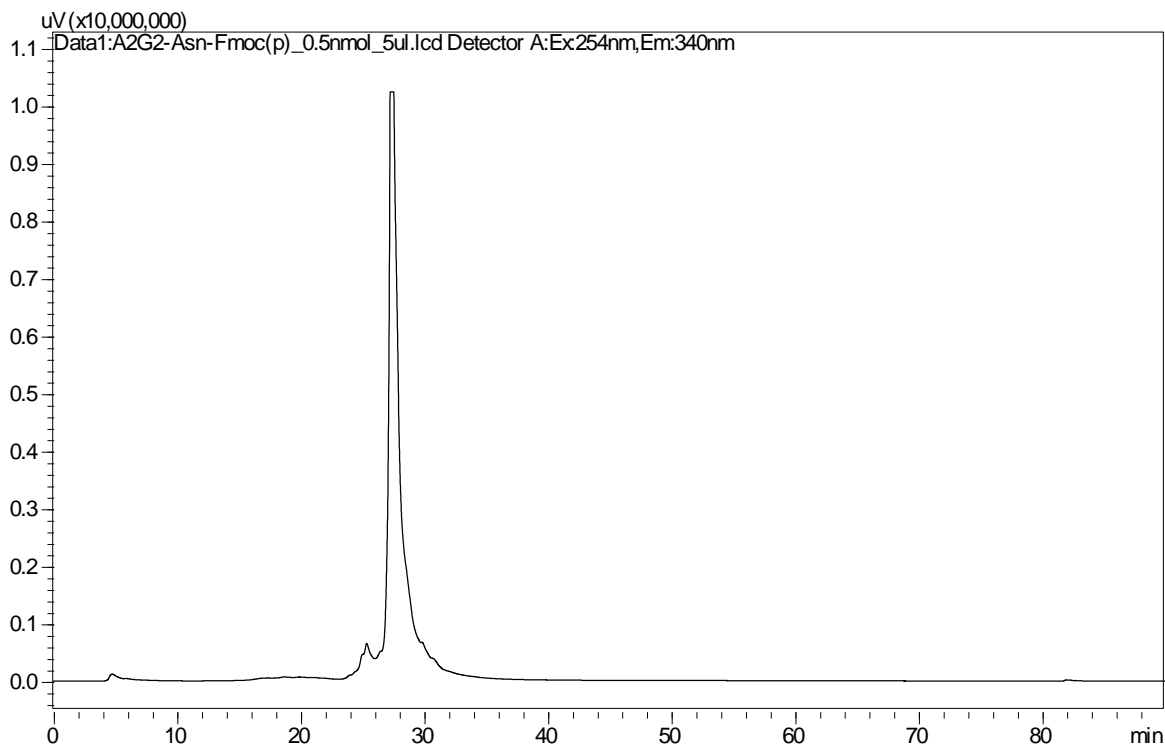

# 10a. 224A3G3-Asn-Fmoc

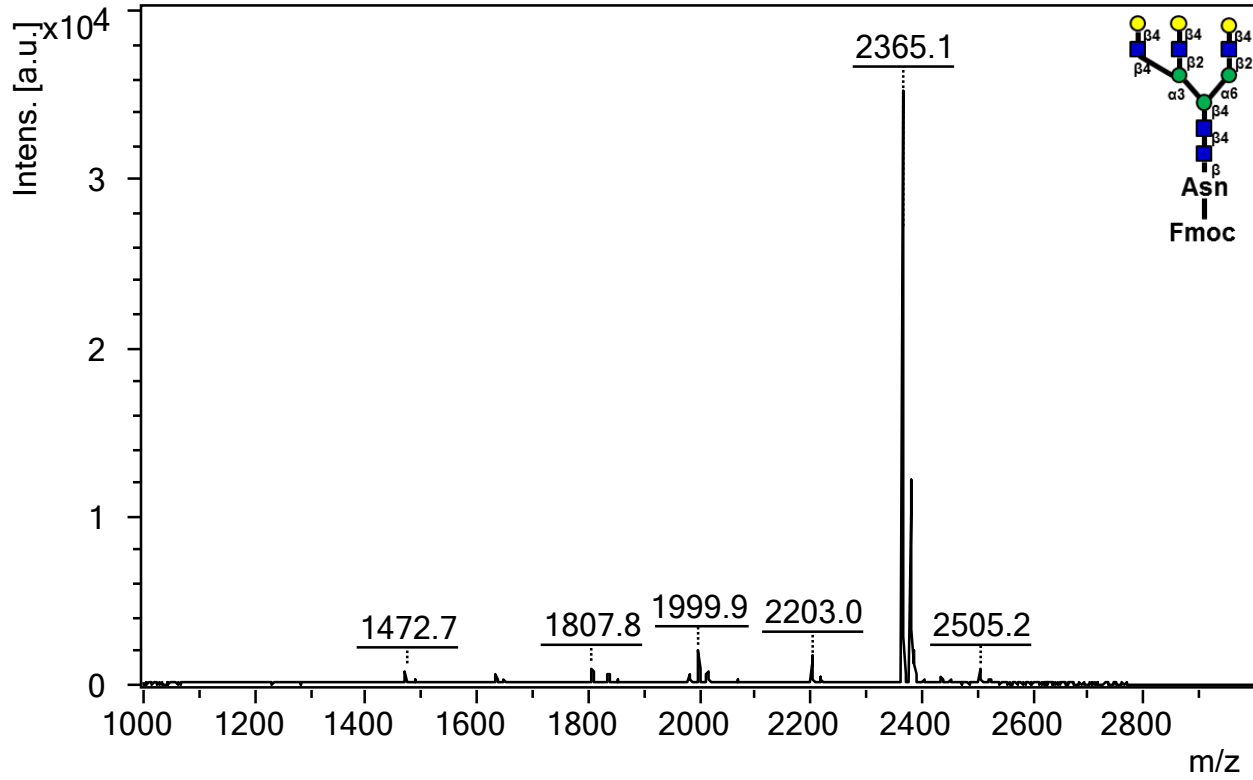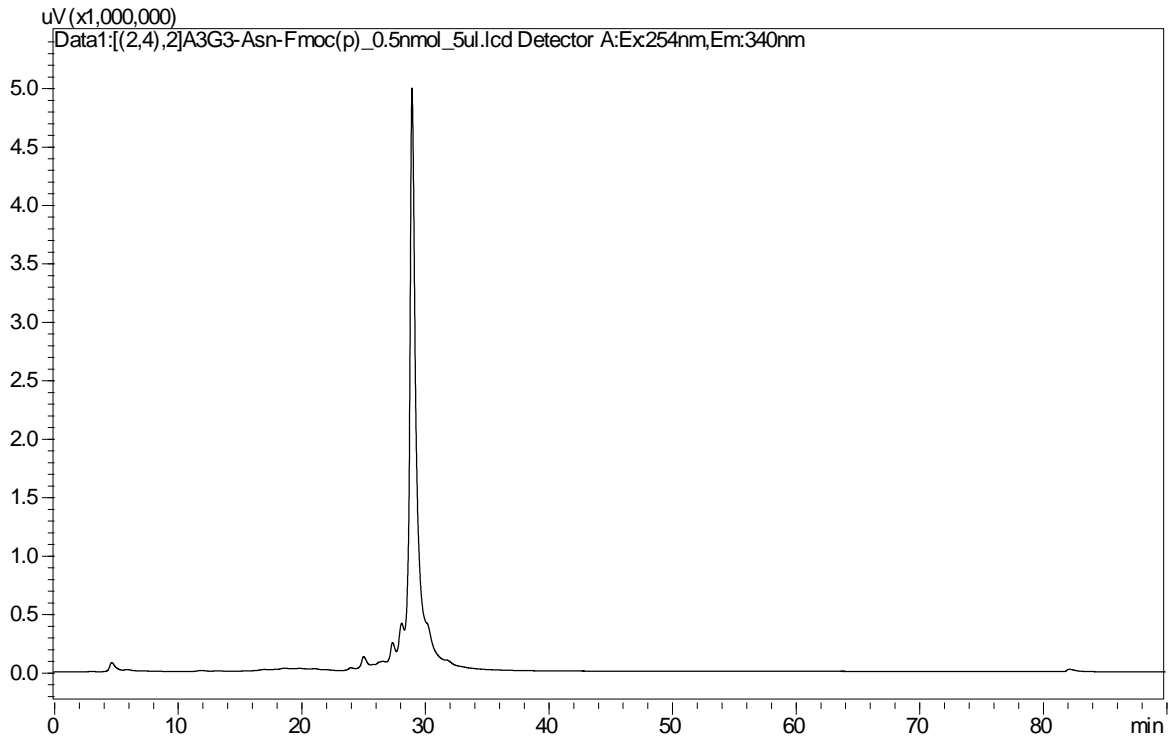

# 11a. 226A3G3-Asn-Fmoc

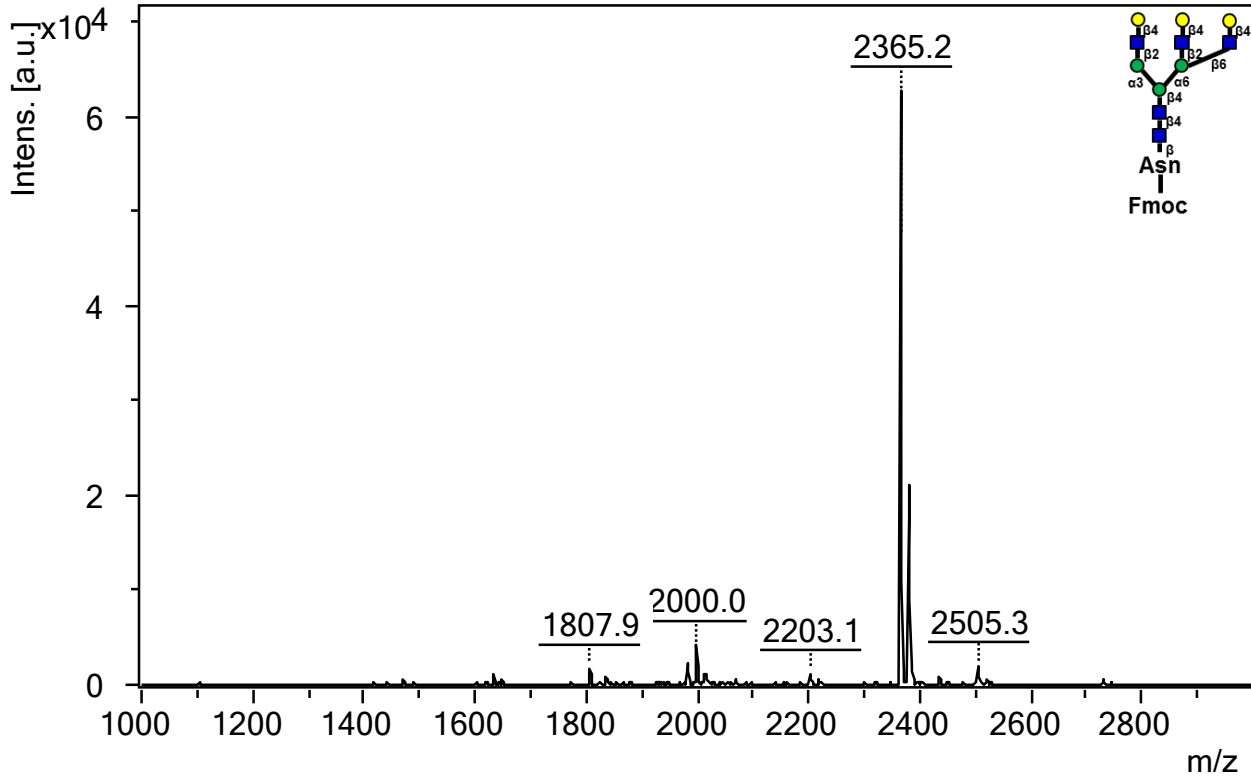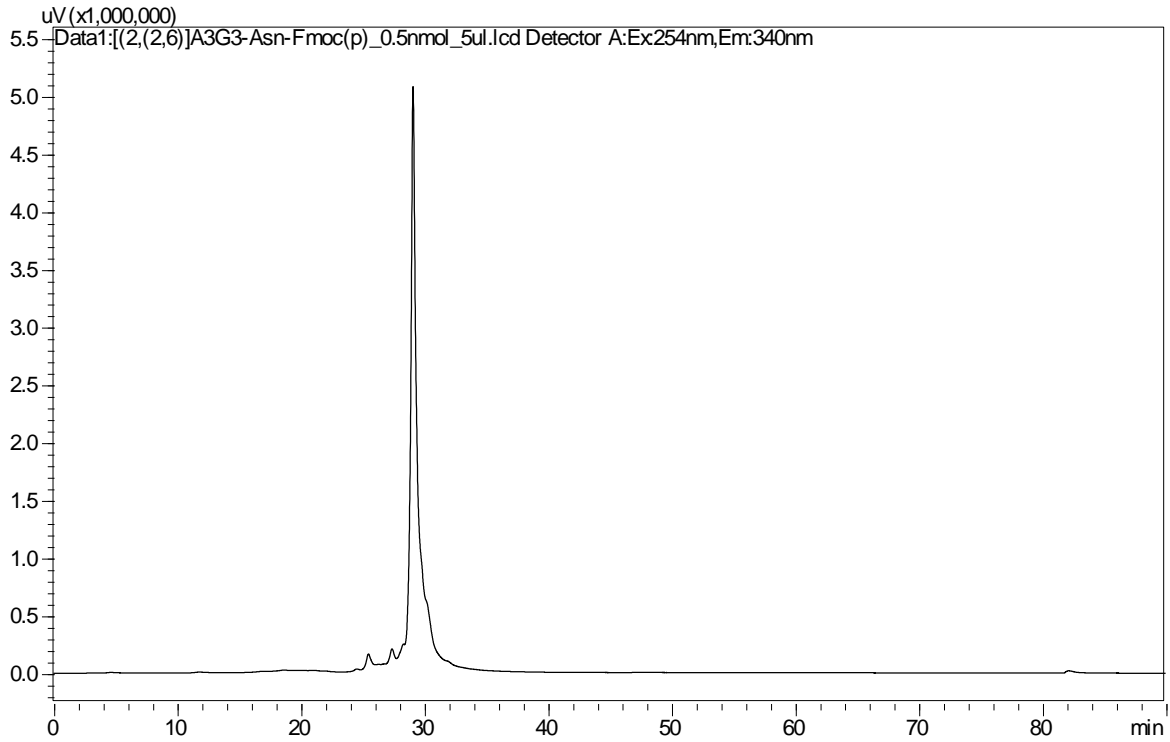

## 12a. A4G4-Asn-Fmoc

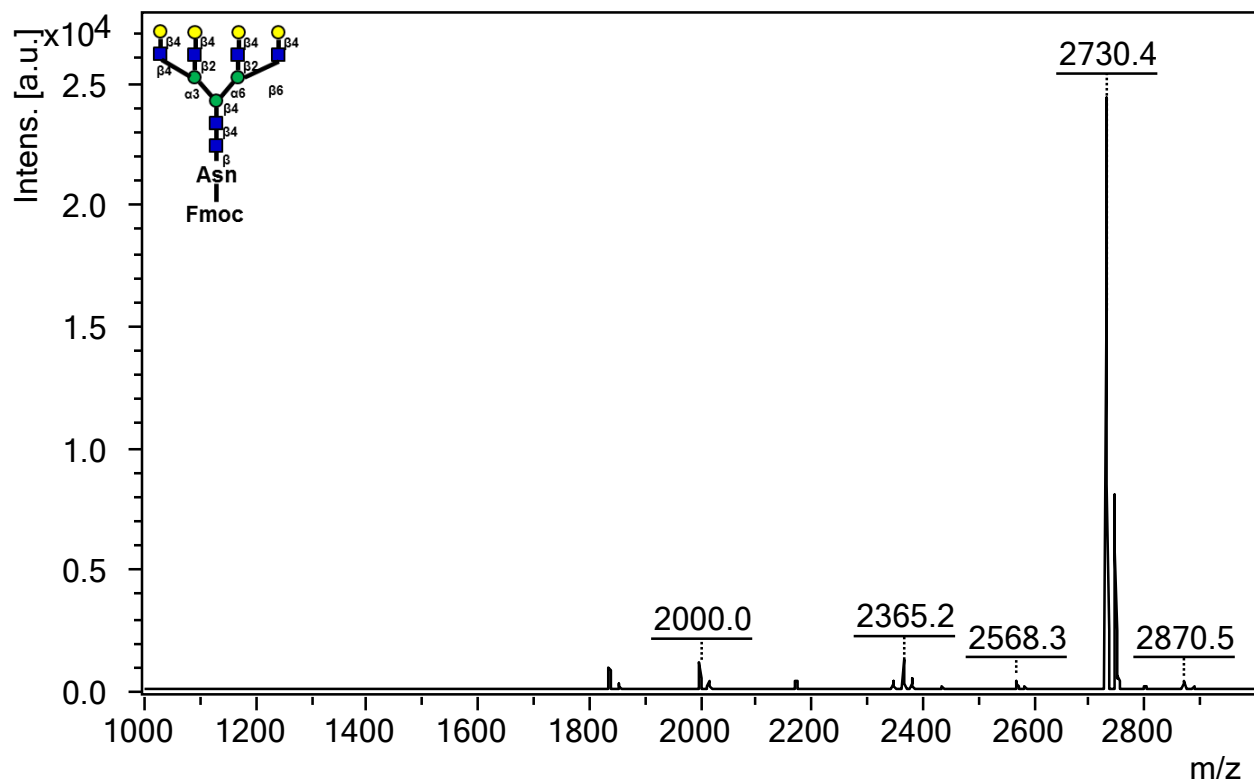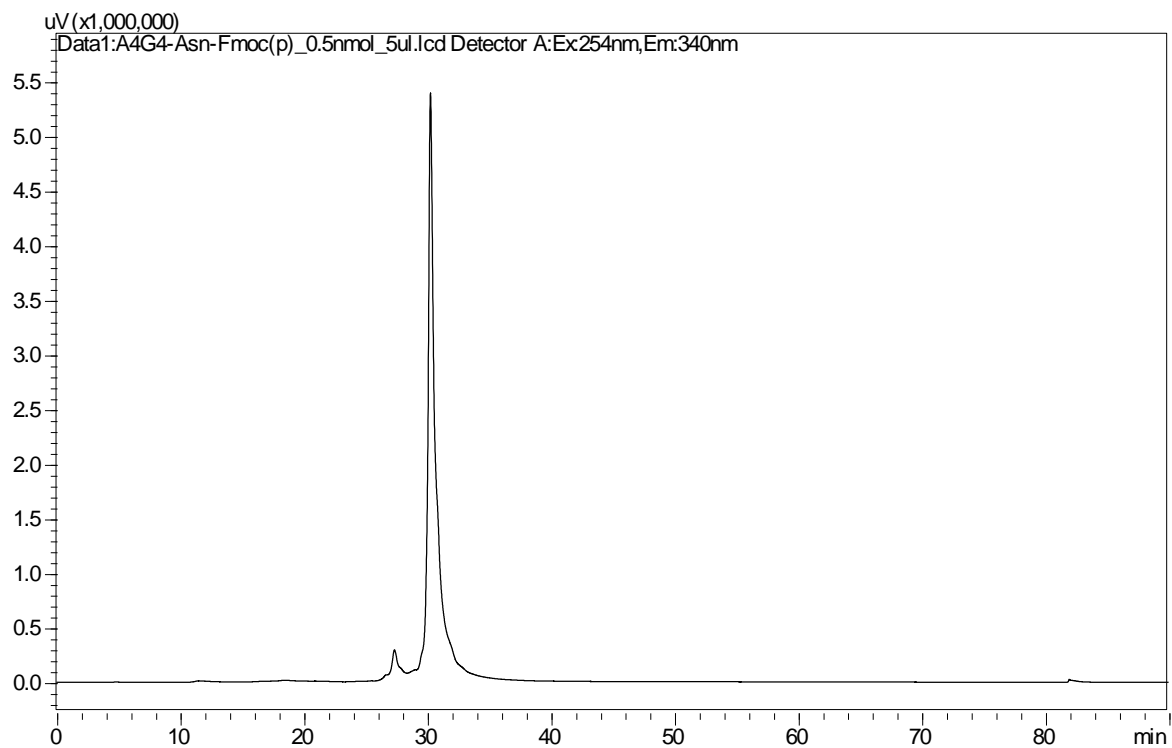

### 13a. A2G2F-Asn-Fmoc

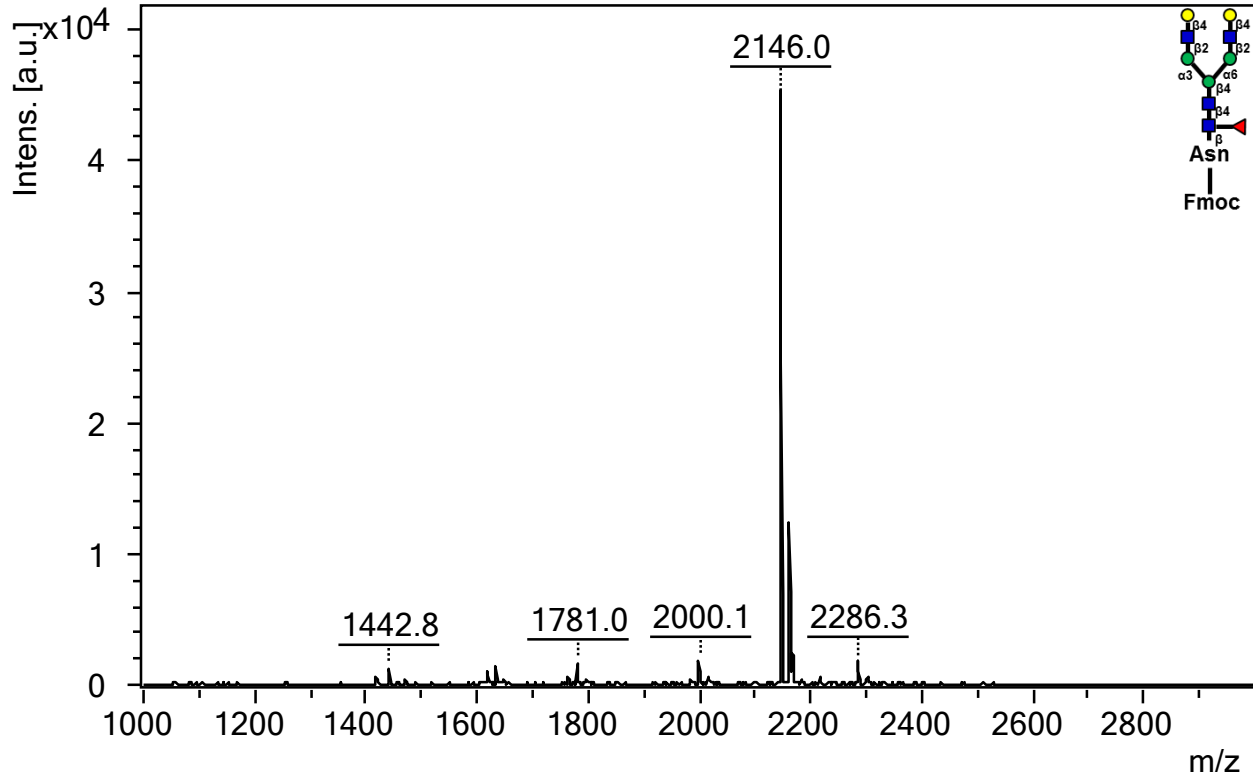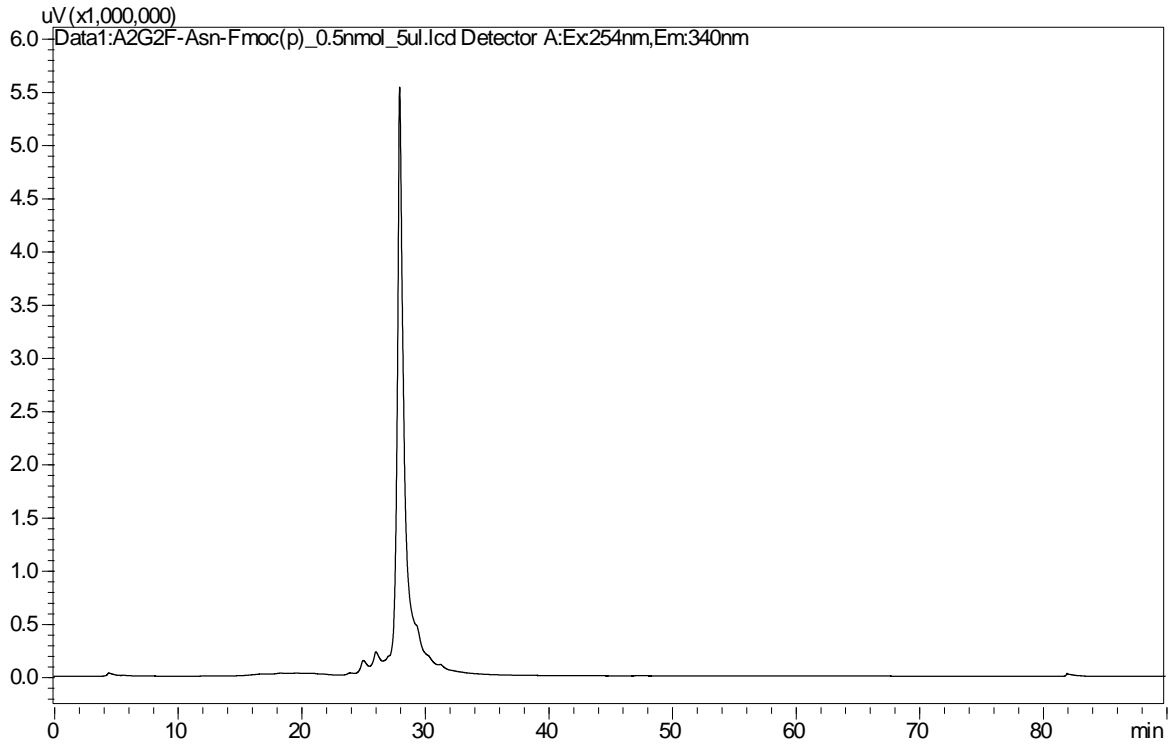

# 14a. 224A3G3F-Asn-Fmoc

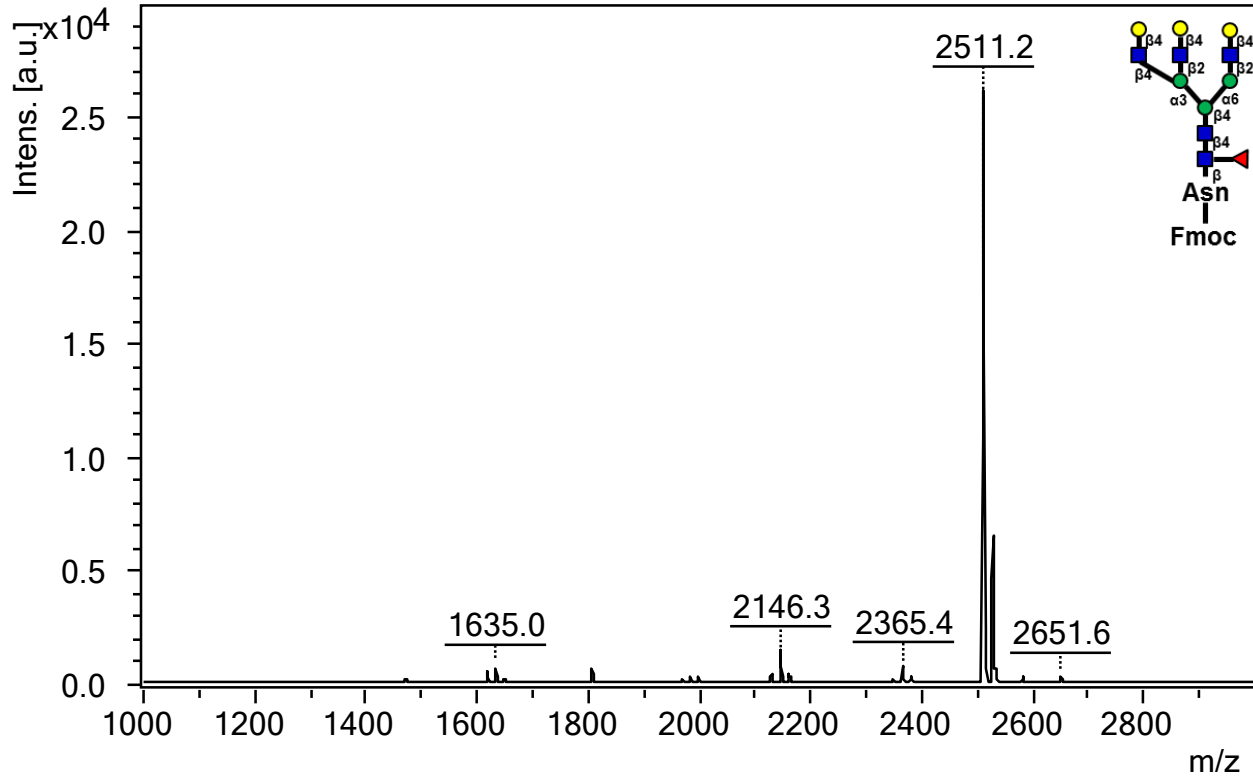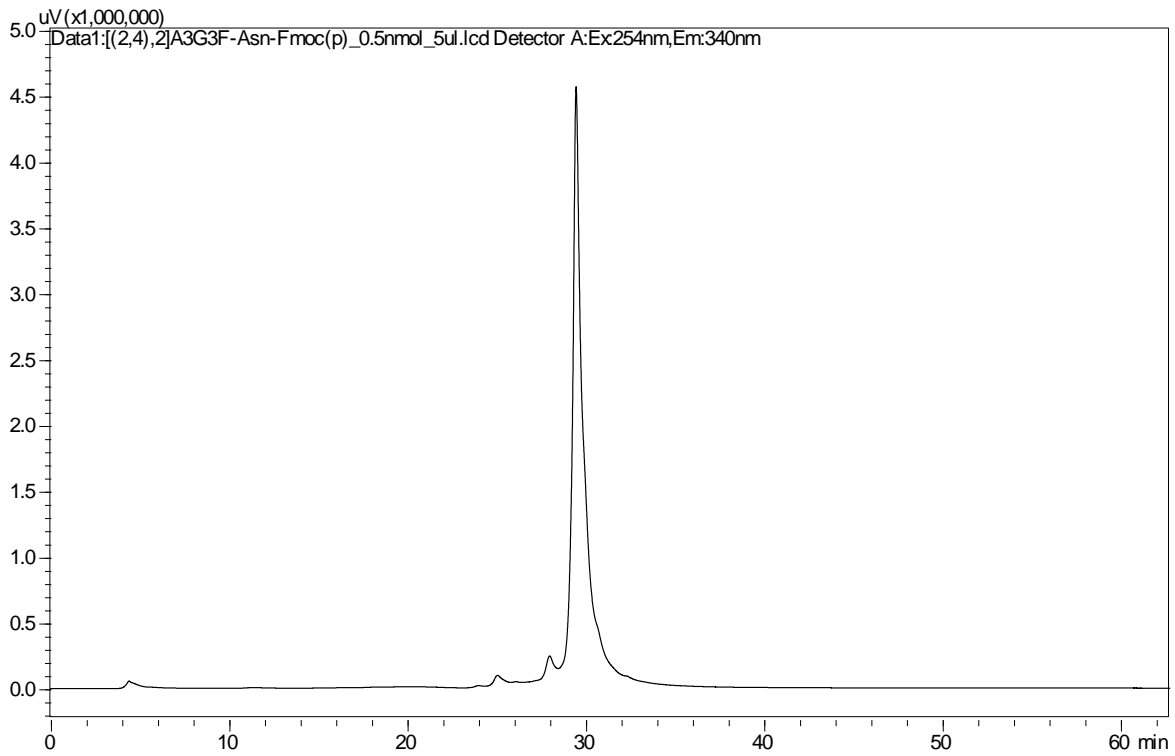

# 15a. 226A3G3F-Asn-Fmoc

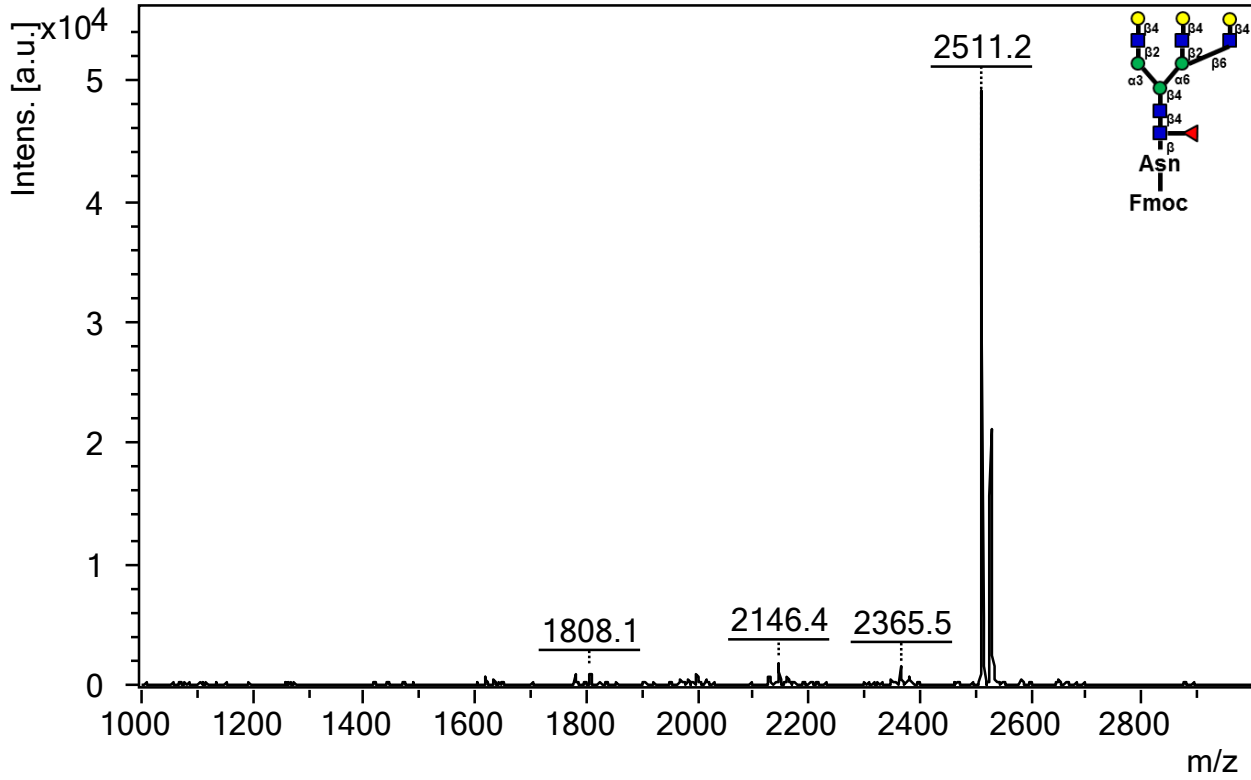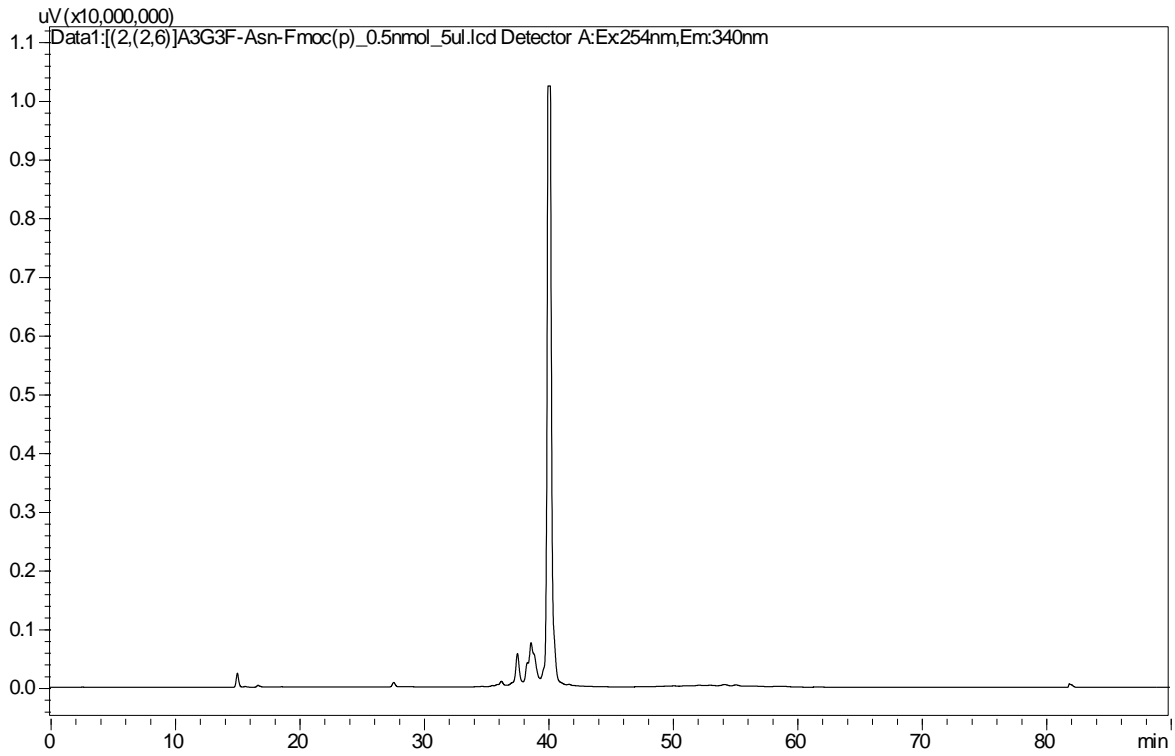

# 16a. A4G4F-Asn-Fmoc

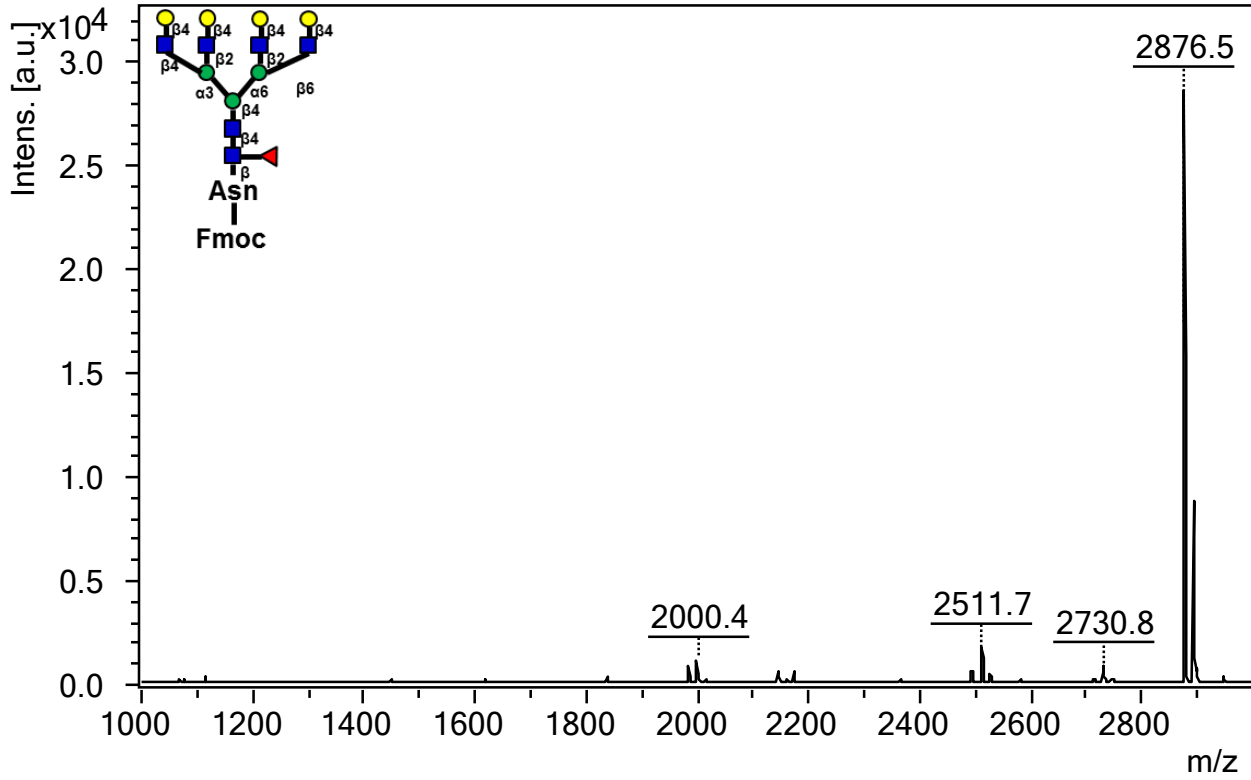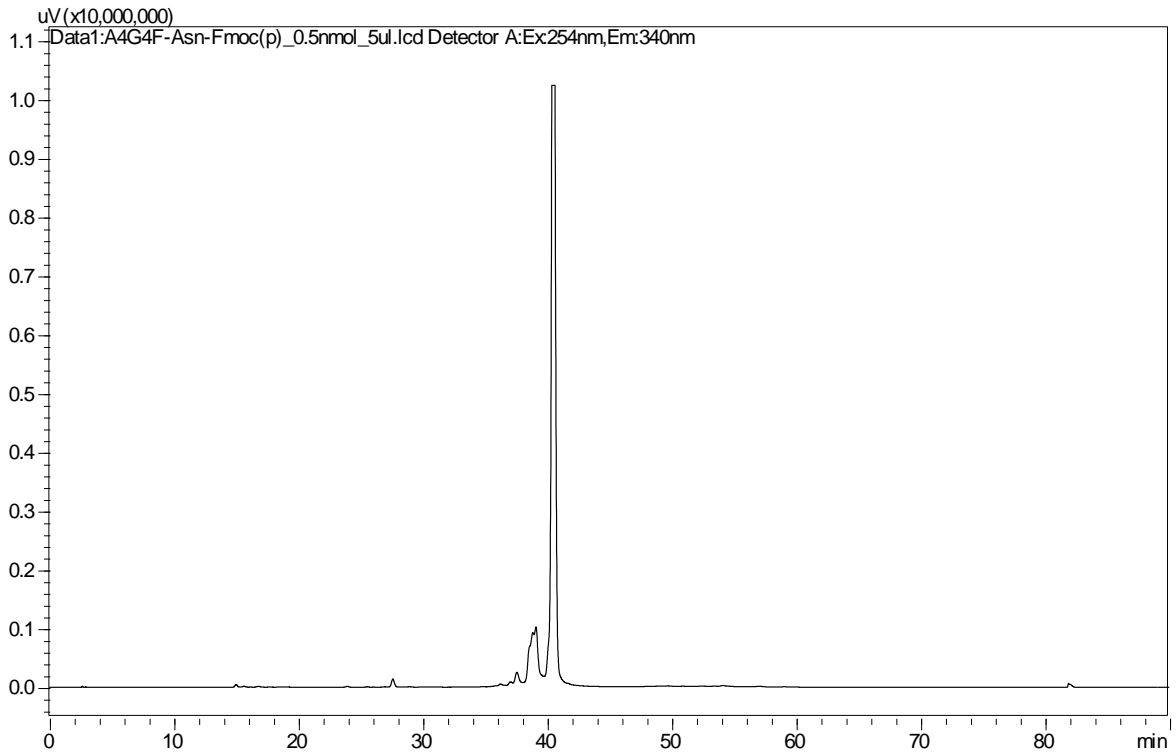



# 17a. 2,3SA2-A2G2-Asn-Fmoc

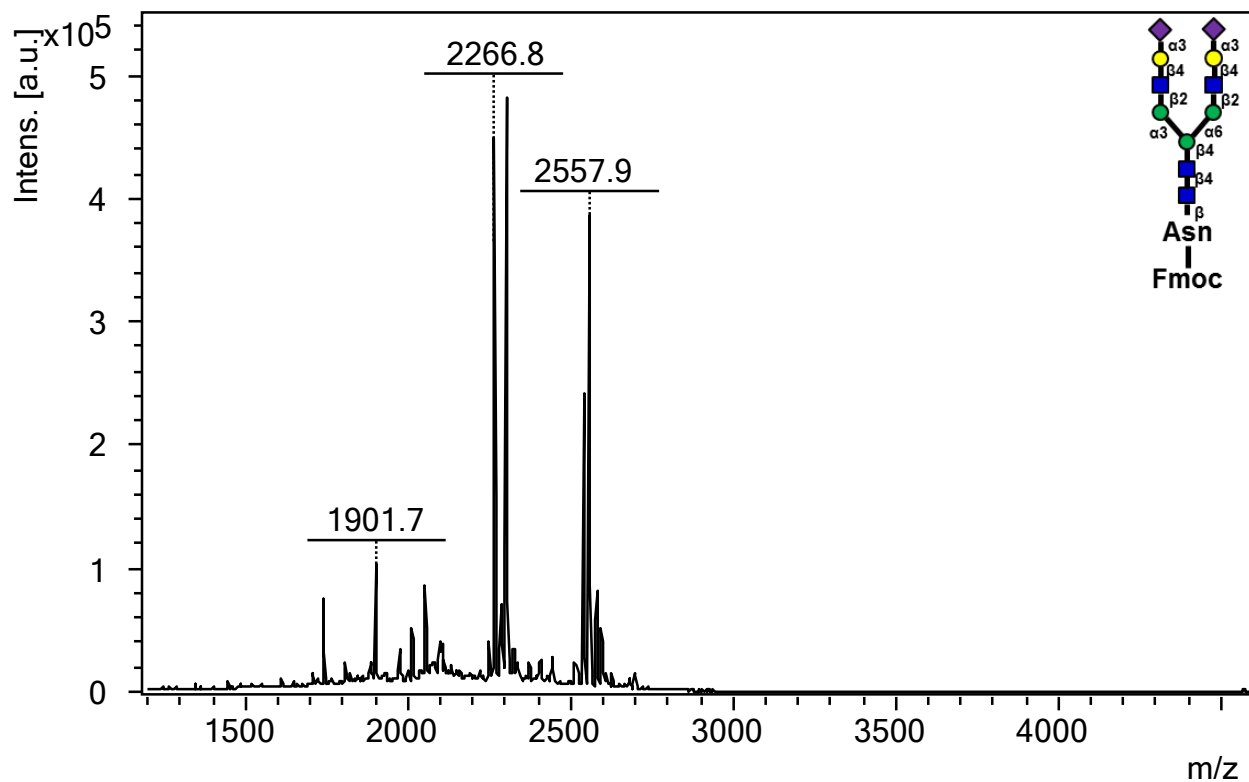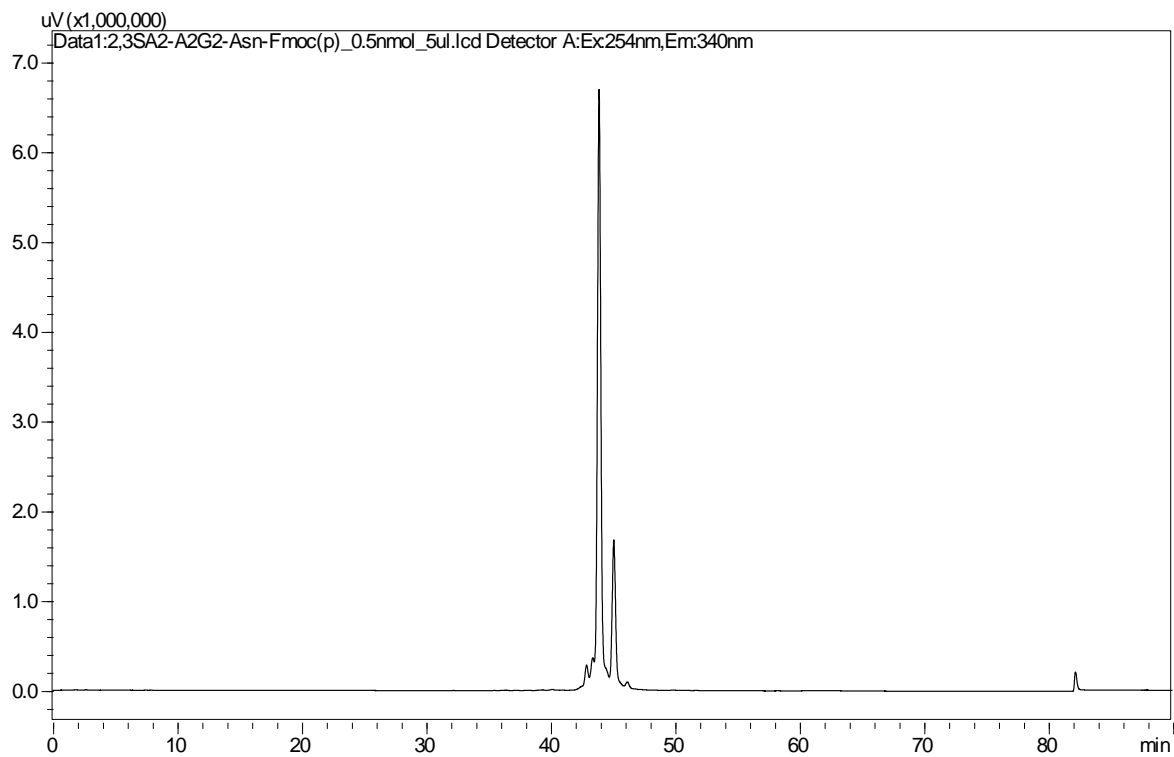

18a. 2,3SA3-224A3G3-Asn-Fmoc

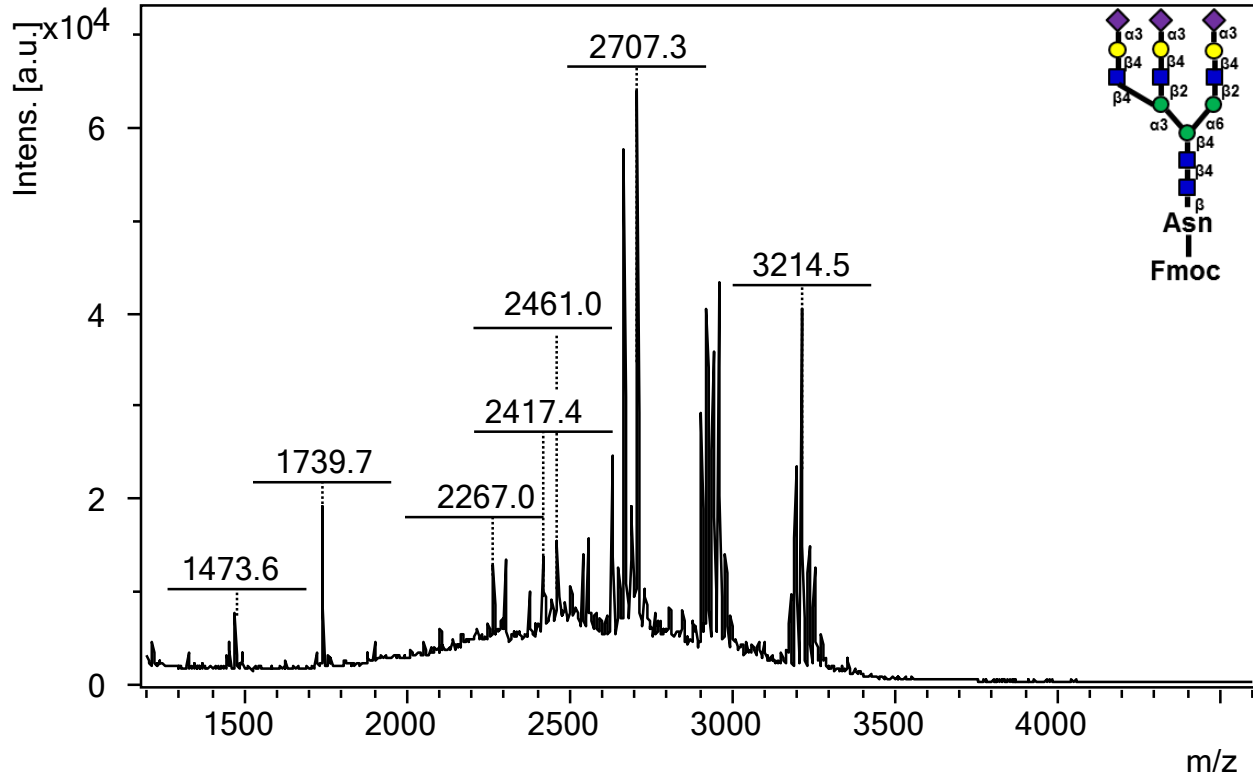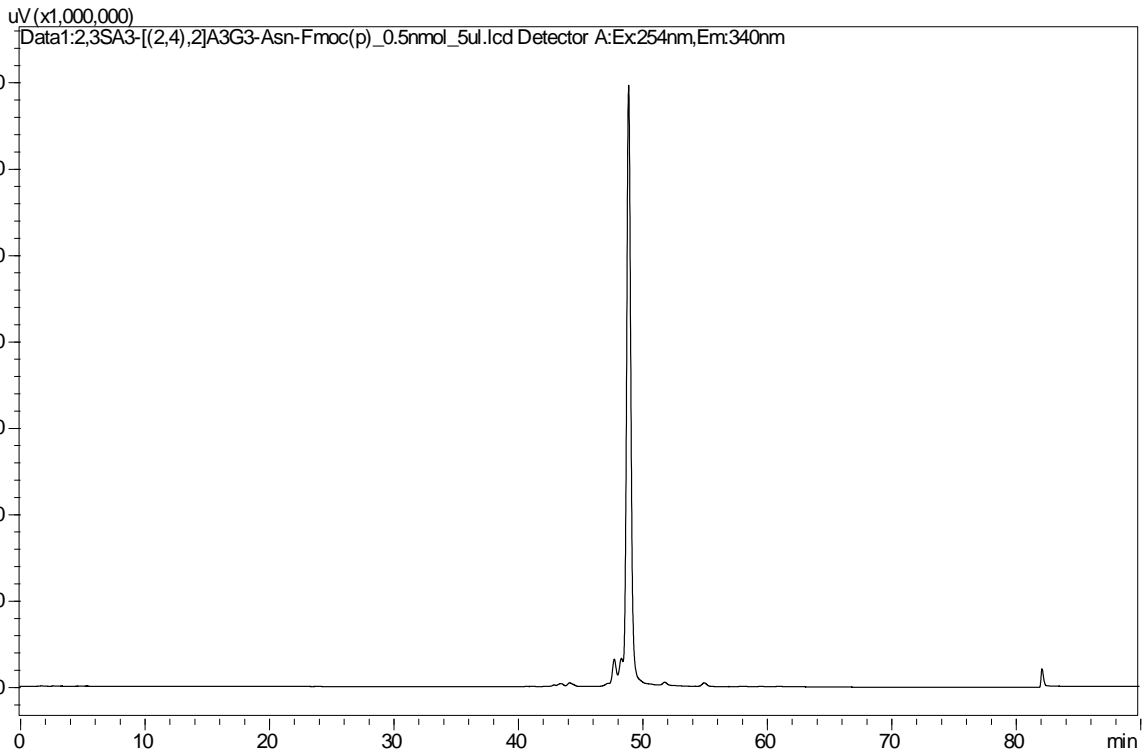

# 19a. 2,3SA3-226A3G3-Asn-Fmoc

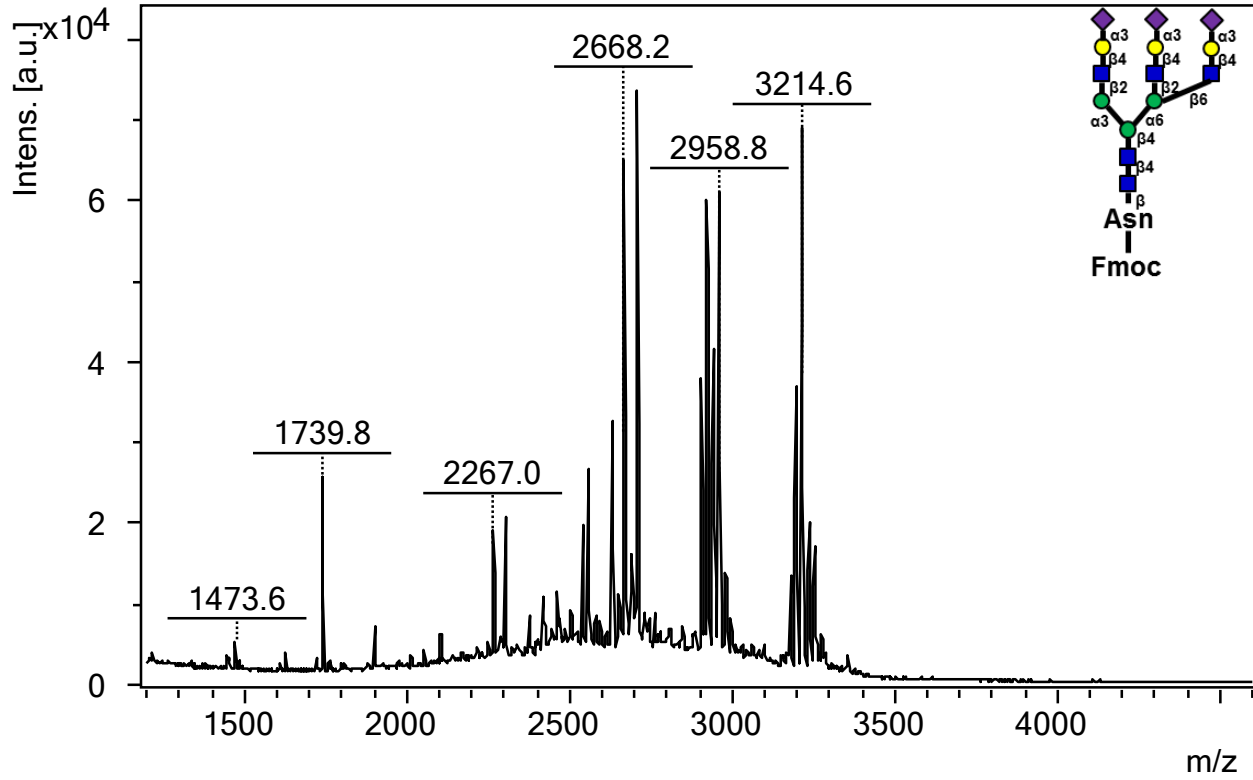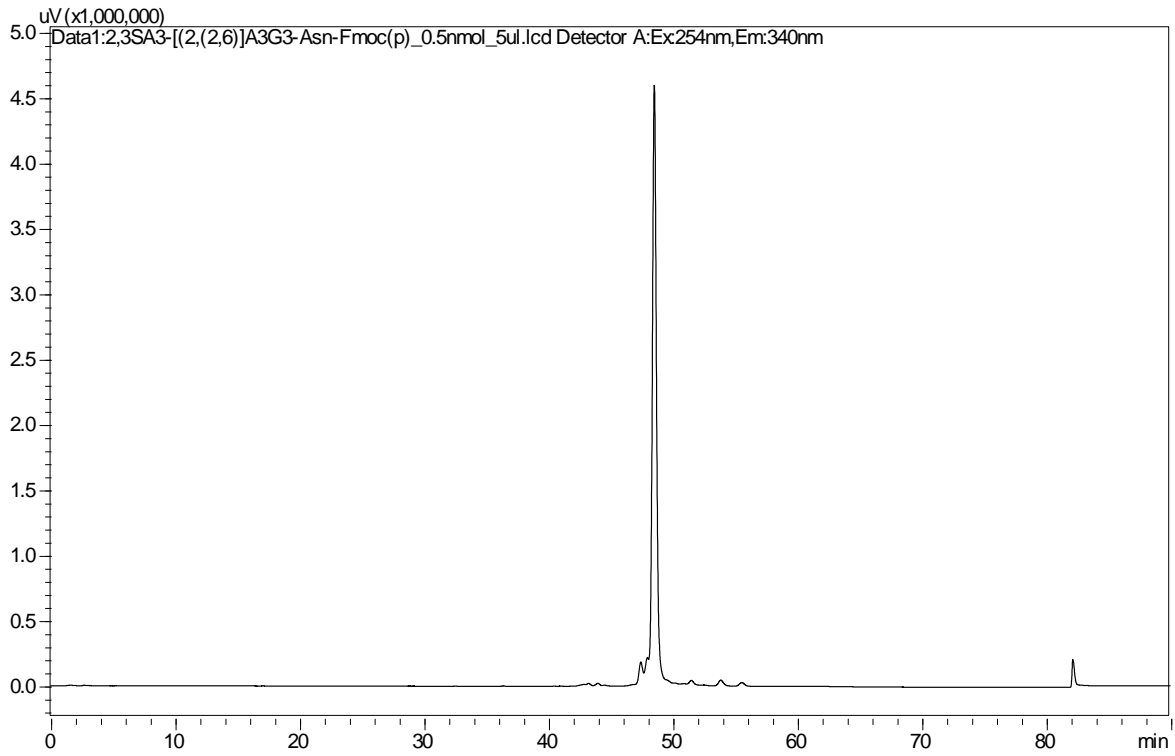

# 20a. 2,3SA4-A4G4-Asn-Fmoc

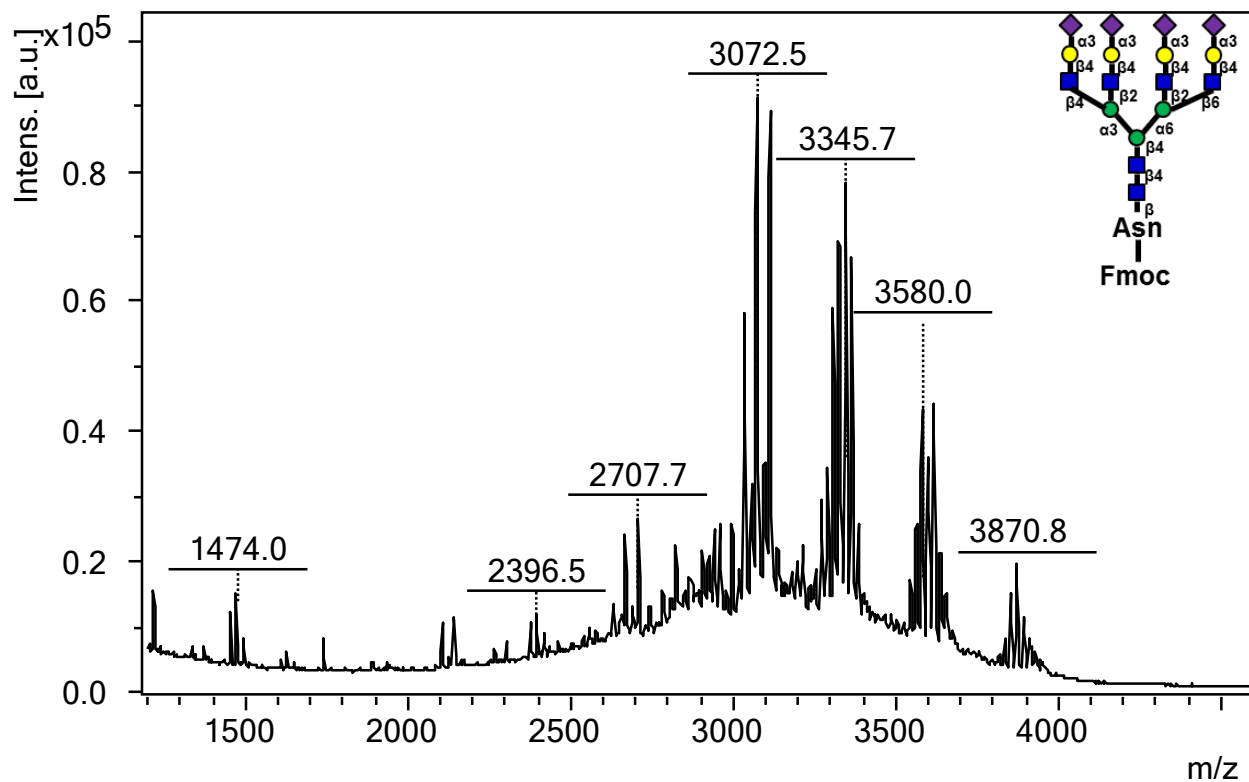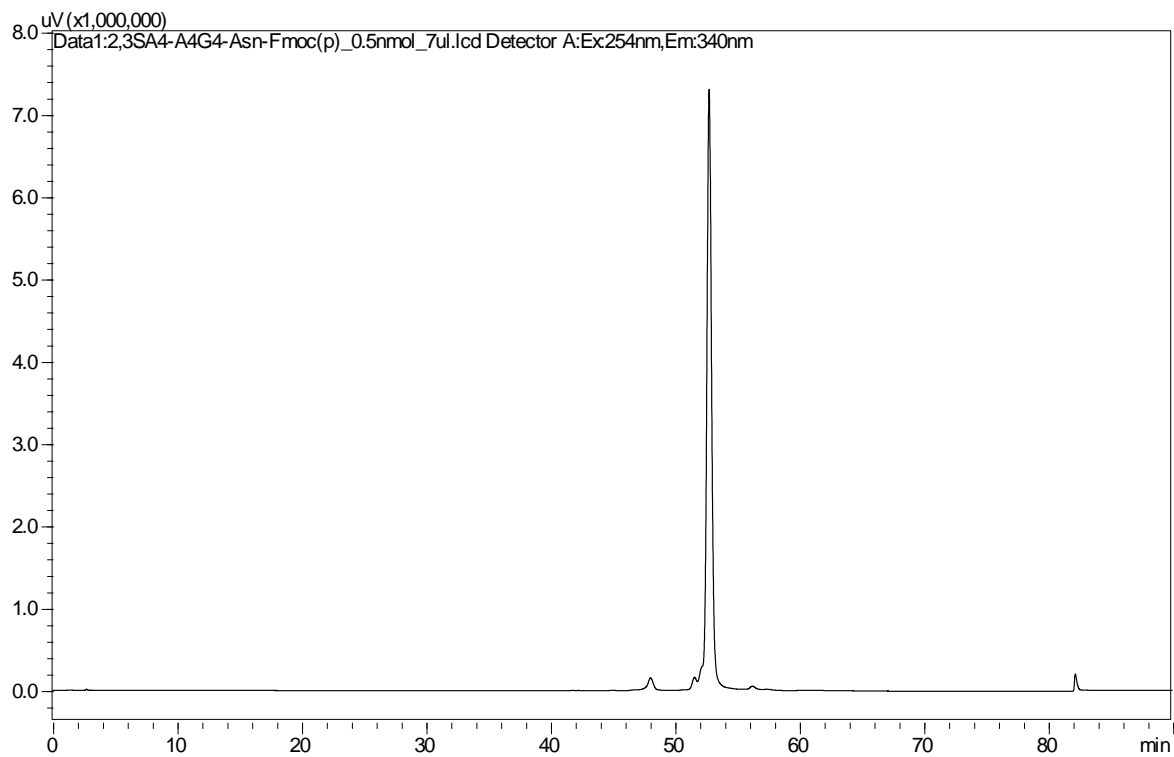

# 21a. 2,3SA2-A2G2F-Asn-Fmoc

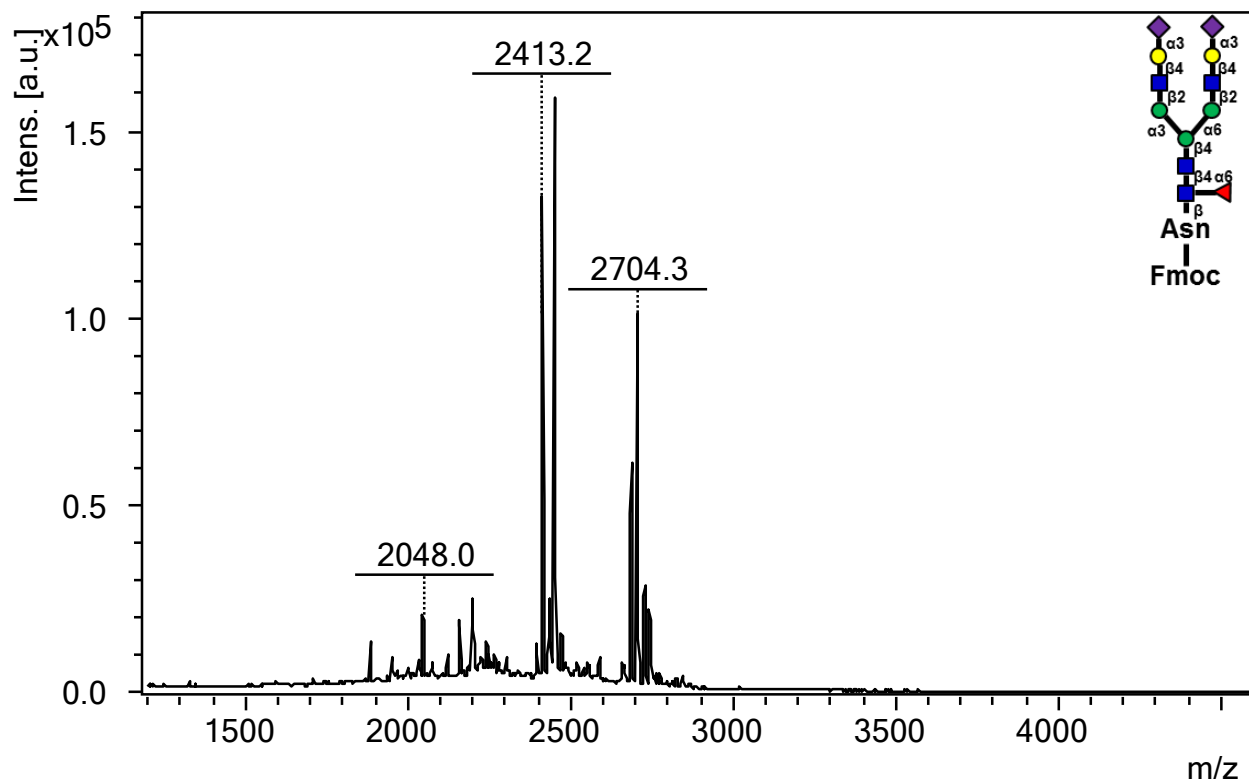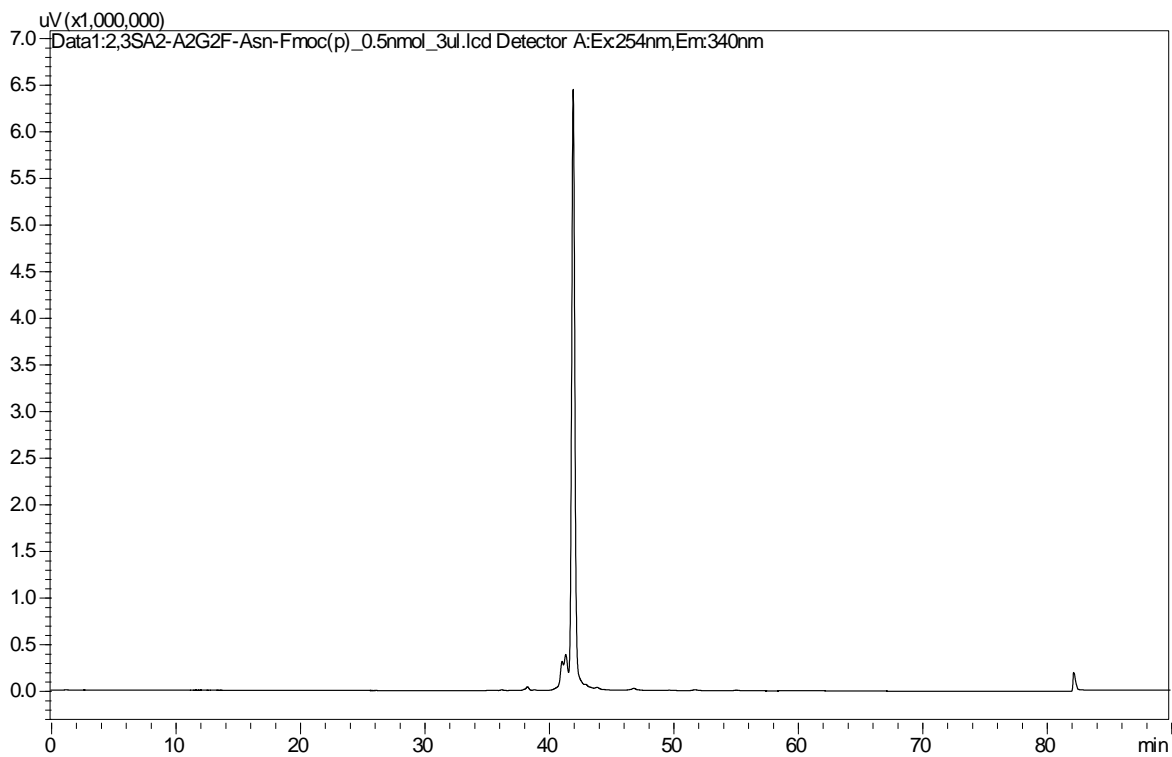

## 22a. 2,3SA3-224A3G3F-Asn-Fmoc

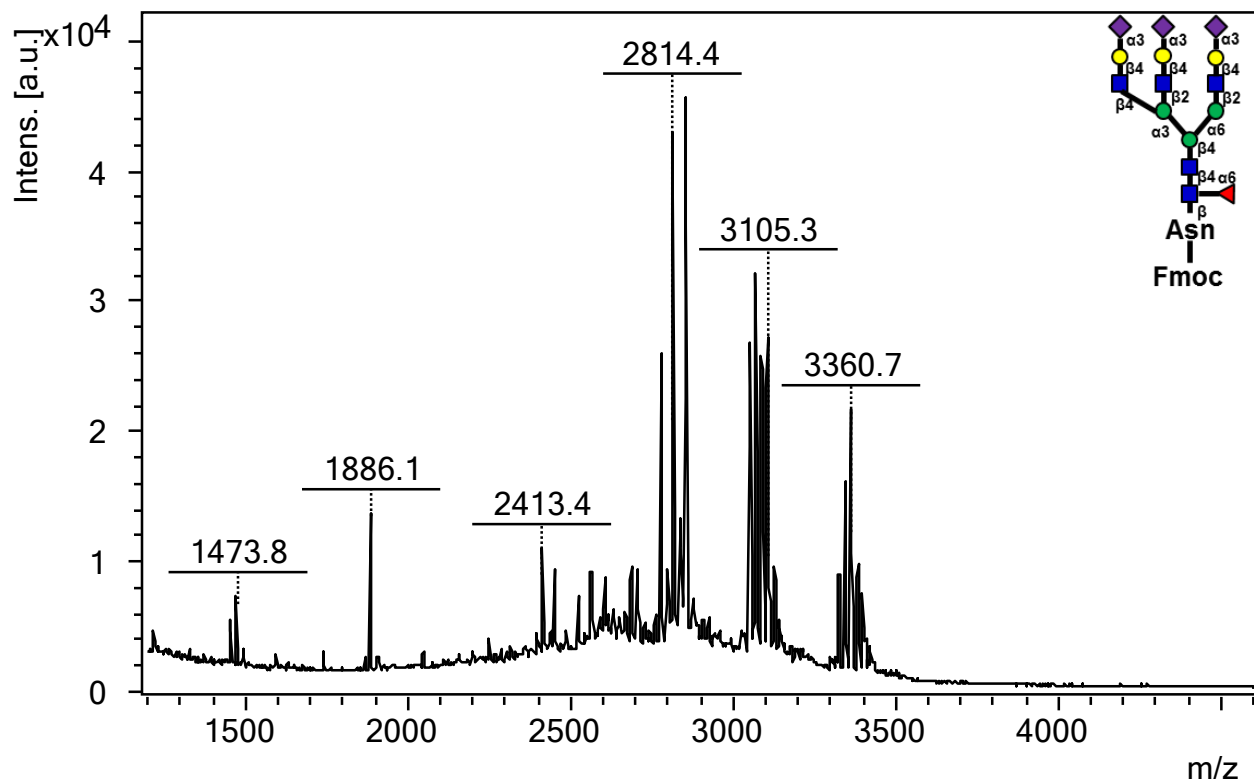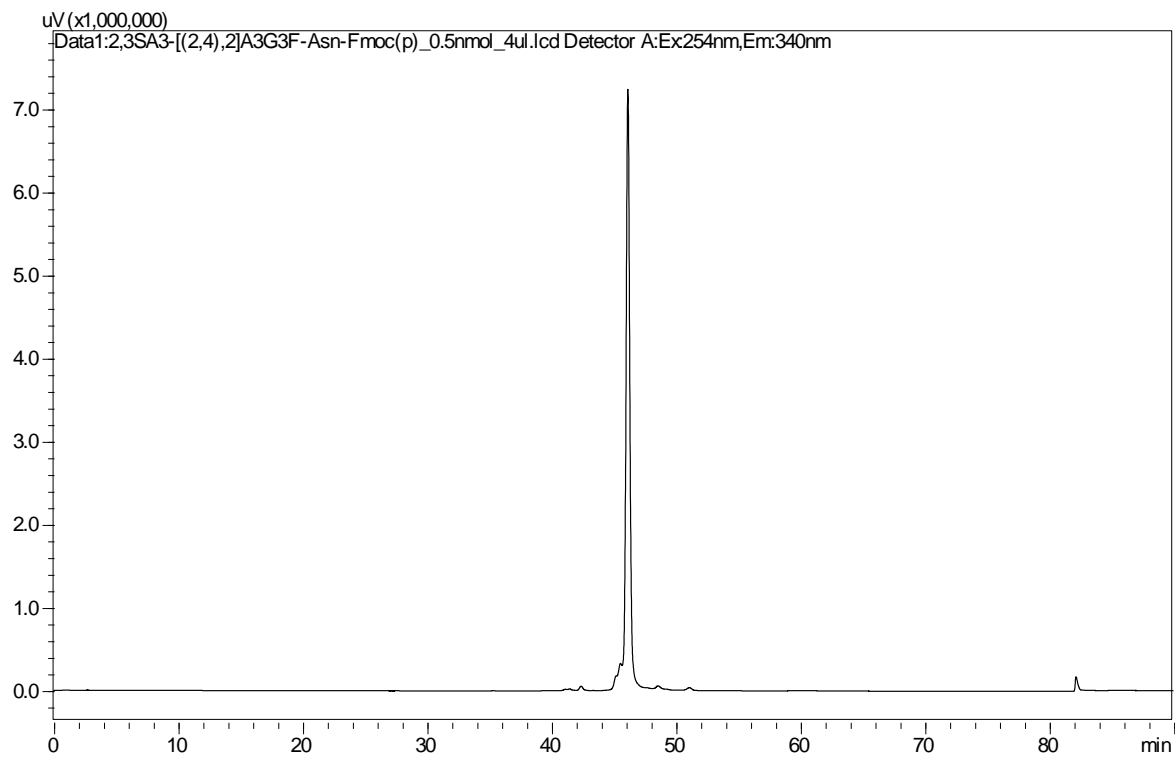

### 23a. 2,3SA3-226A3G3F-Asn-Fmoc

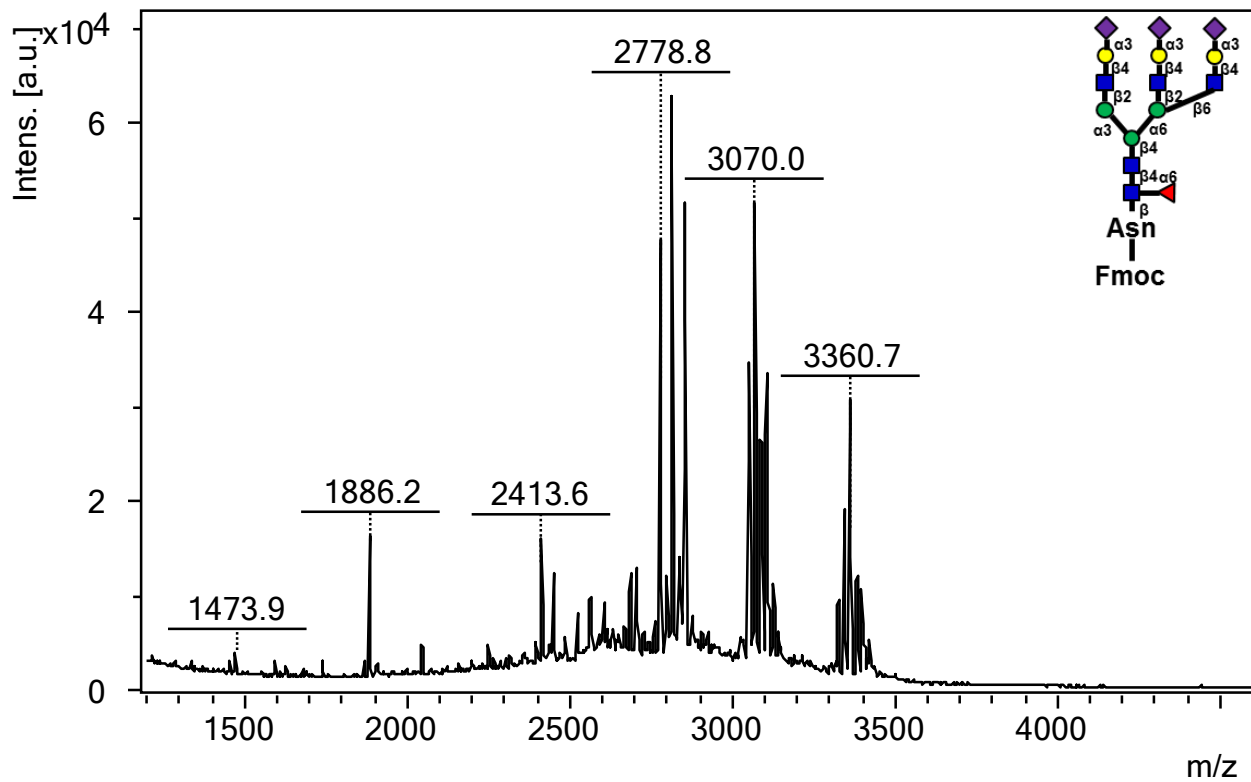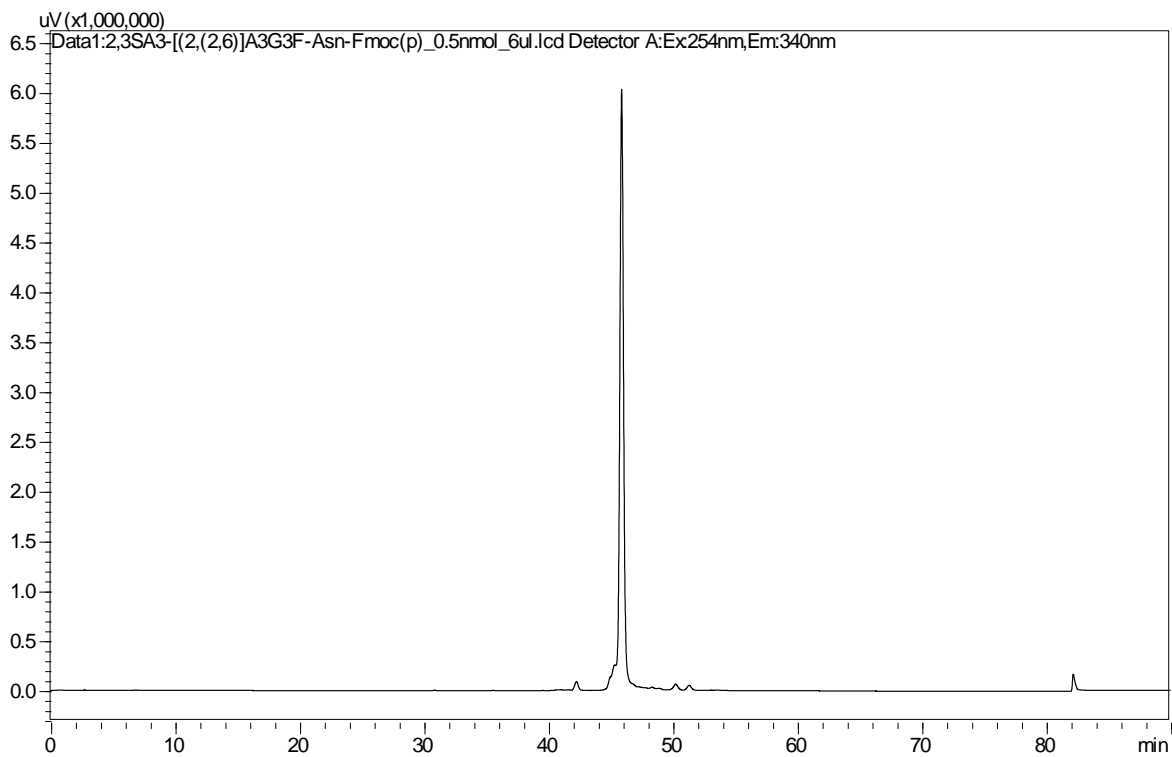

## 24a. 2,3SA4-A4G4F-Asn-Fmoc

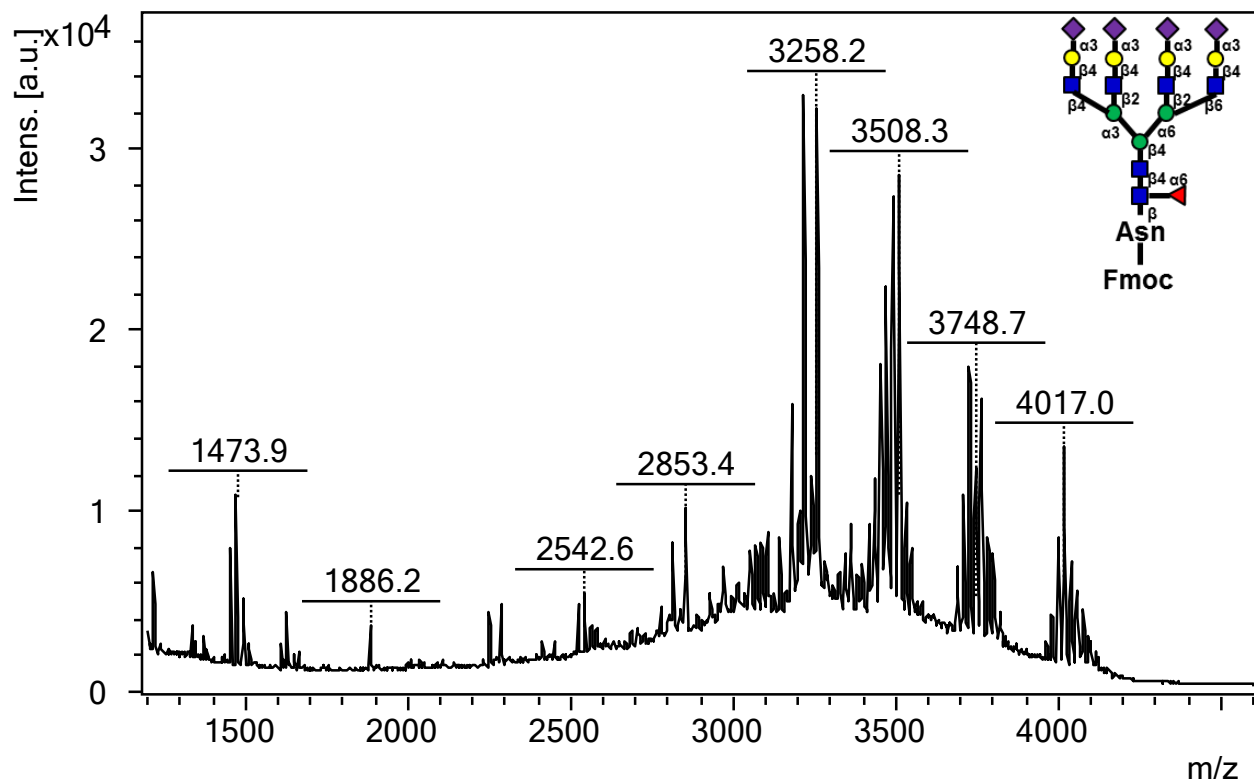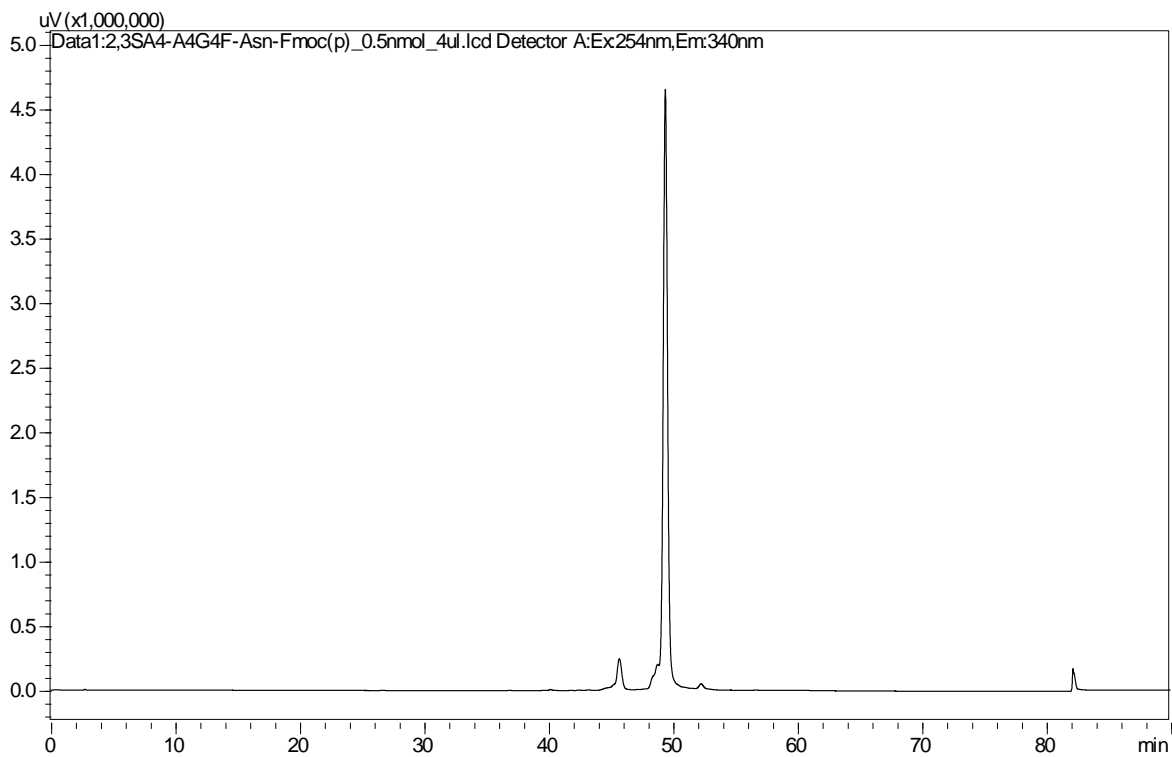



# 25a. 2,6SA2-A2G2-Asn-Fmoc

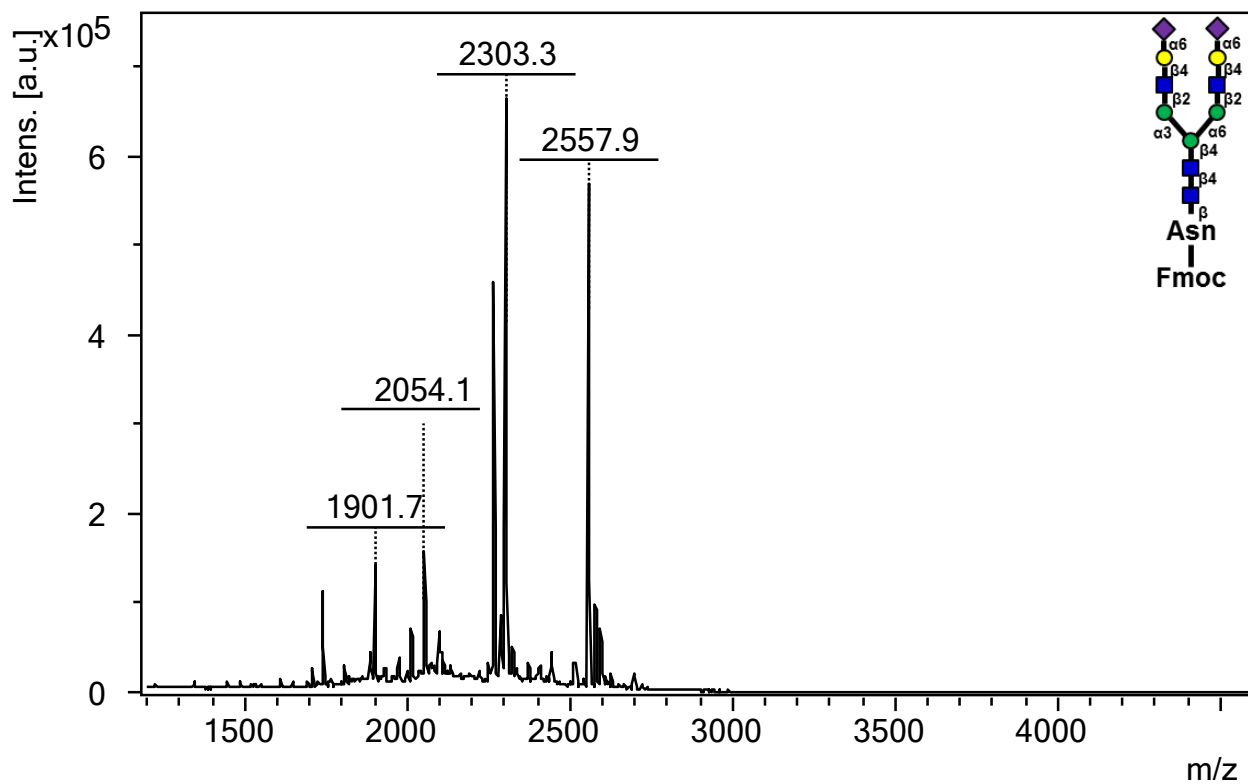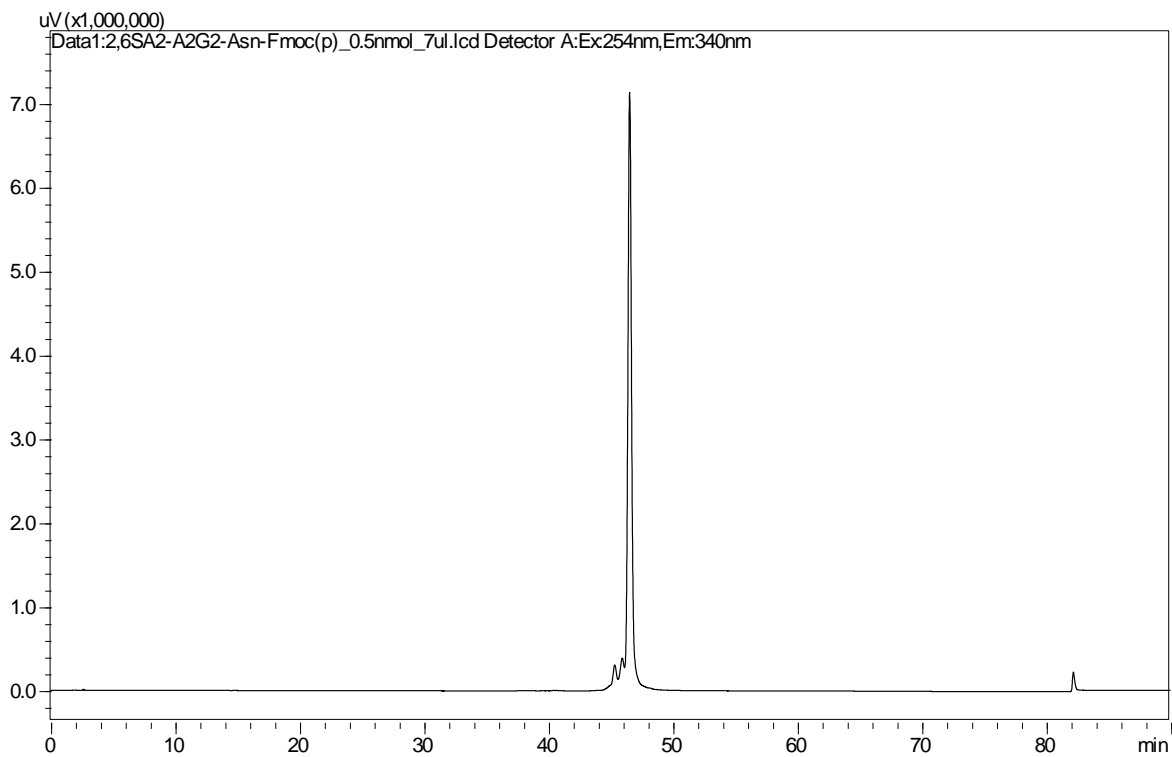

# 26a. 2,6SA3-224A3G3-Asn-Fmoc

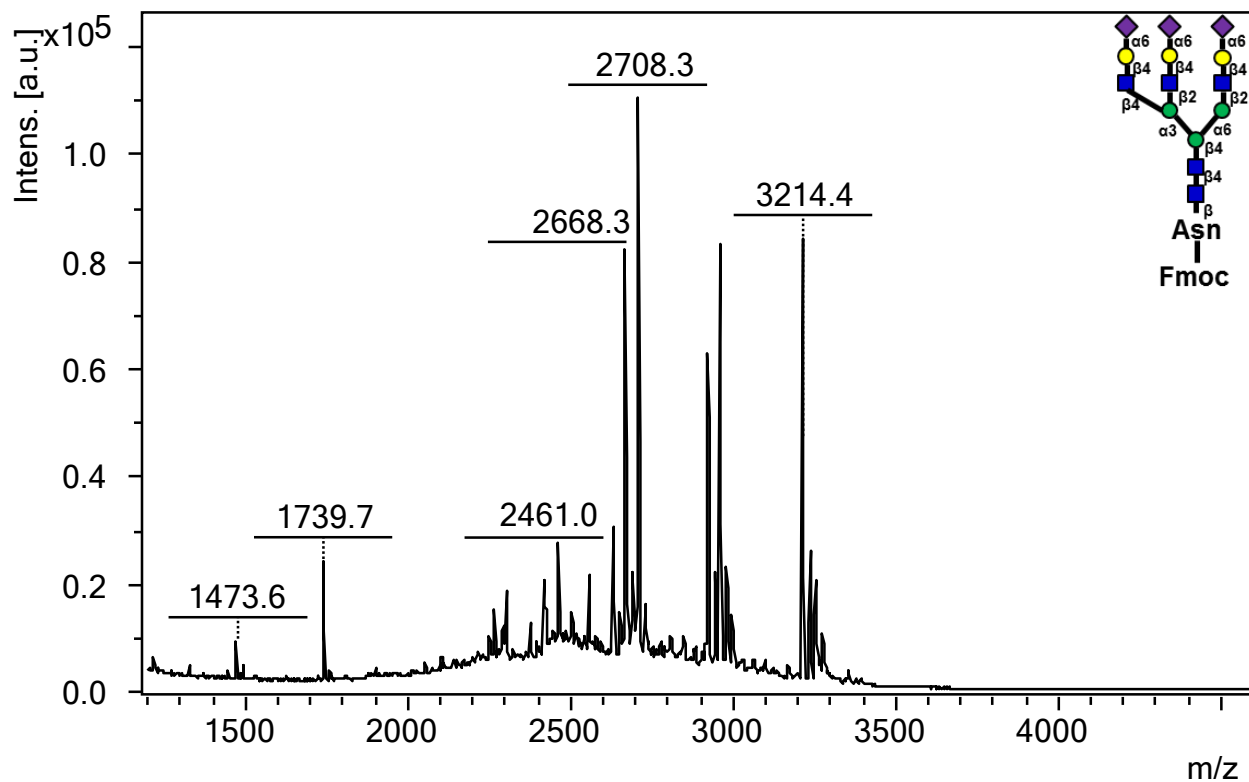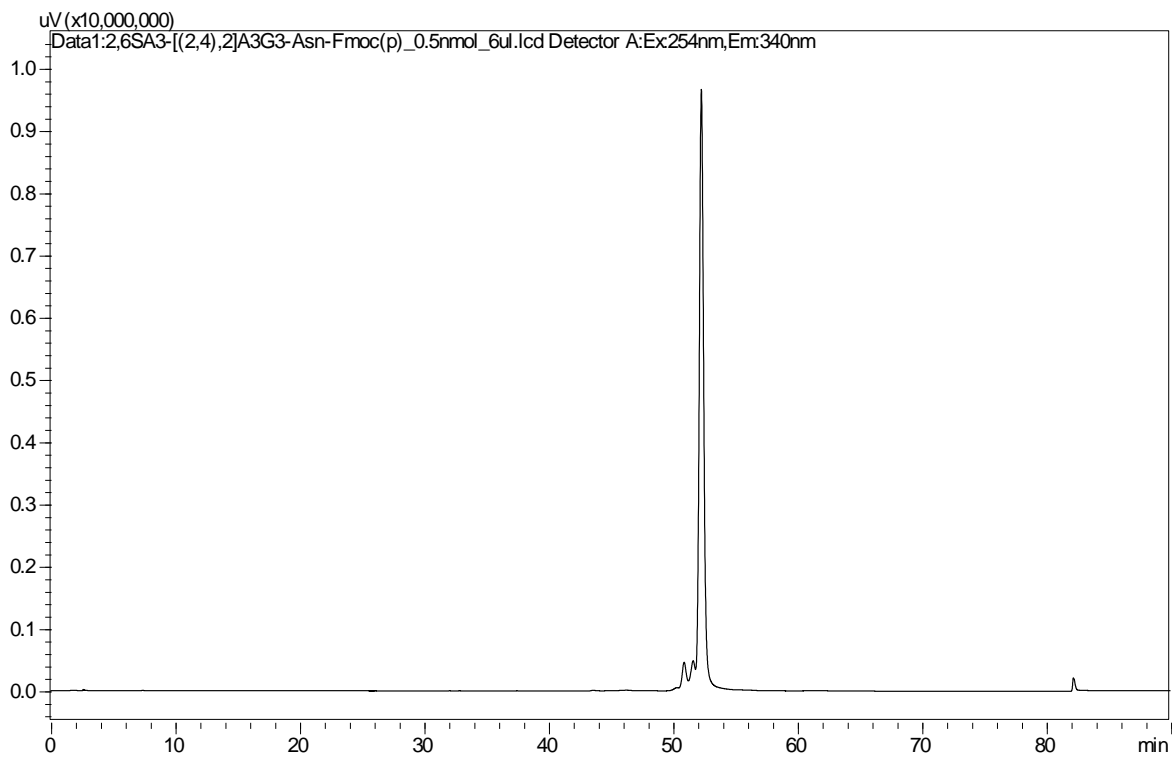

# 27a. 2,6SA3-226A3G3-Asn-Fmoc

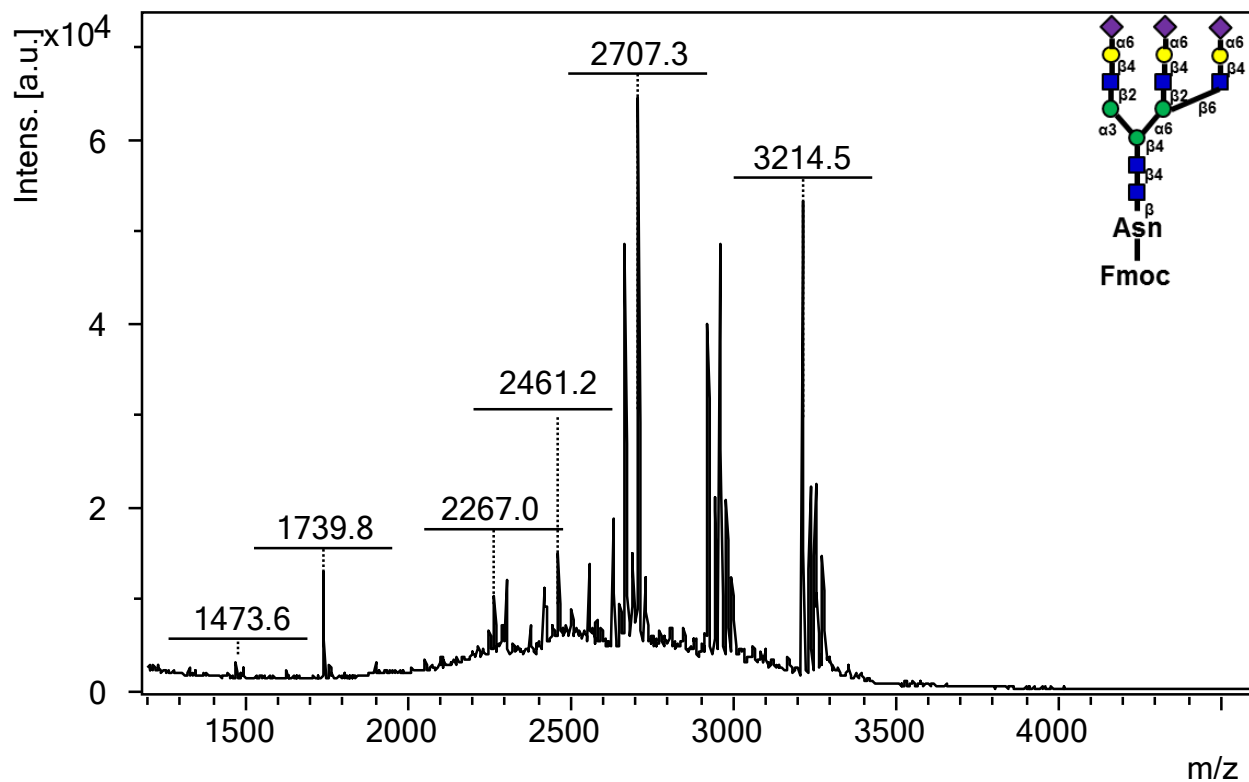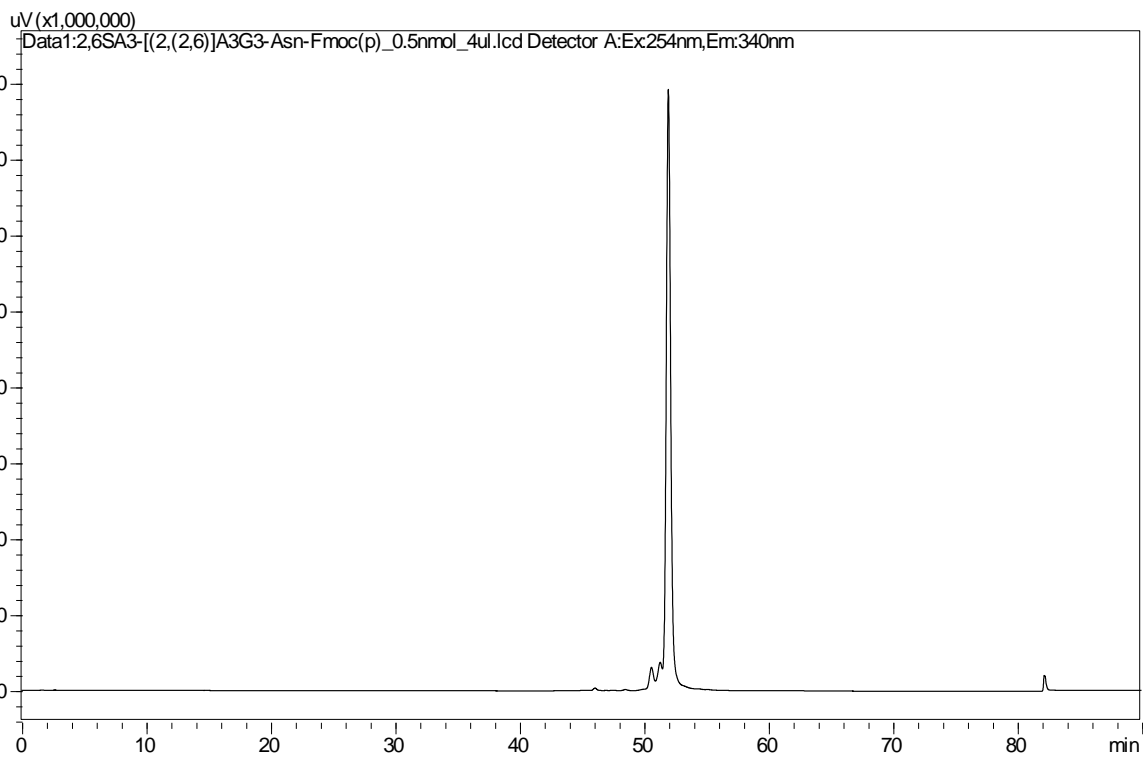

# 28a. 2,6SA4-A4G4-Asn-Fmoc

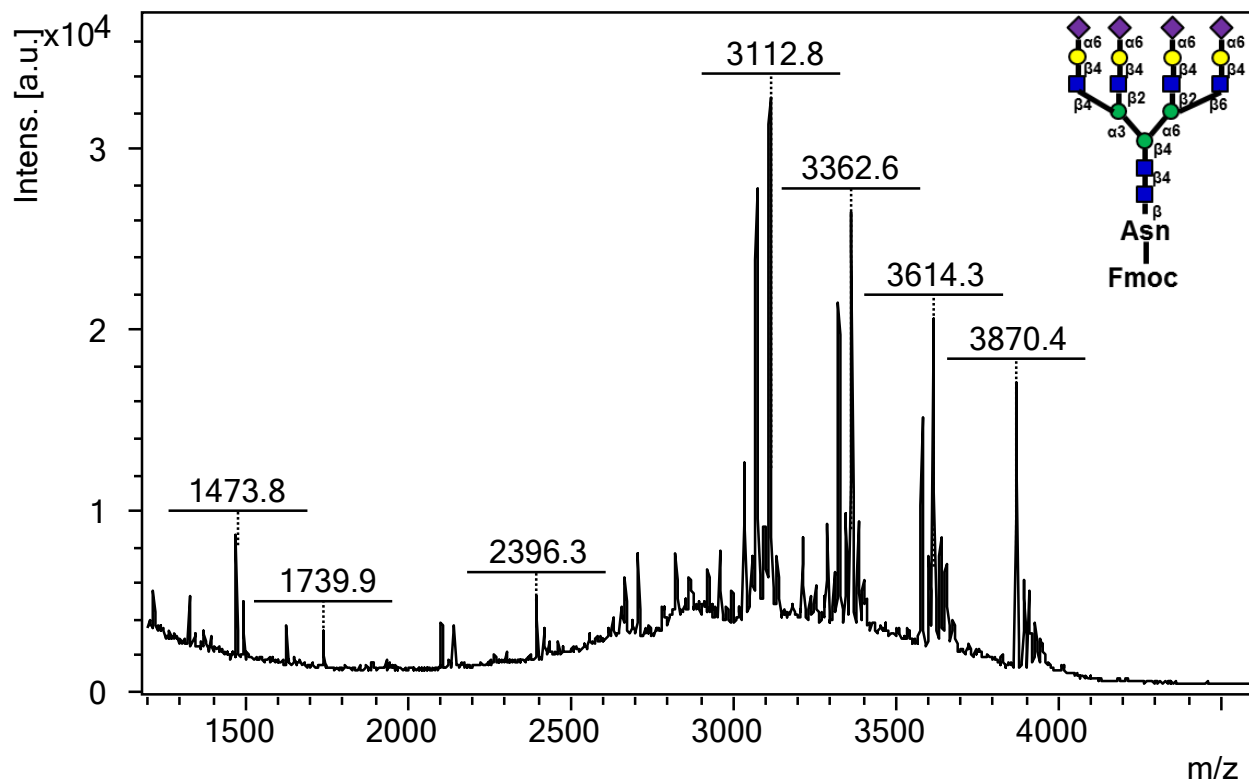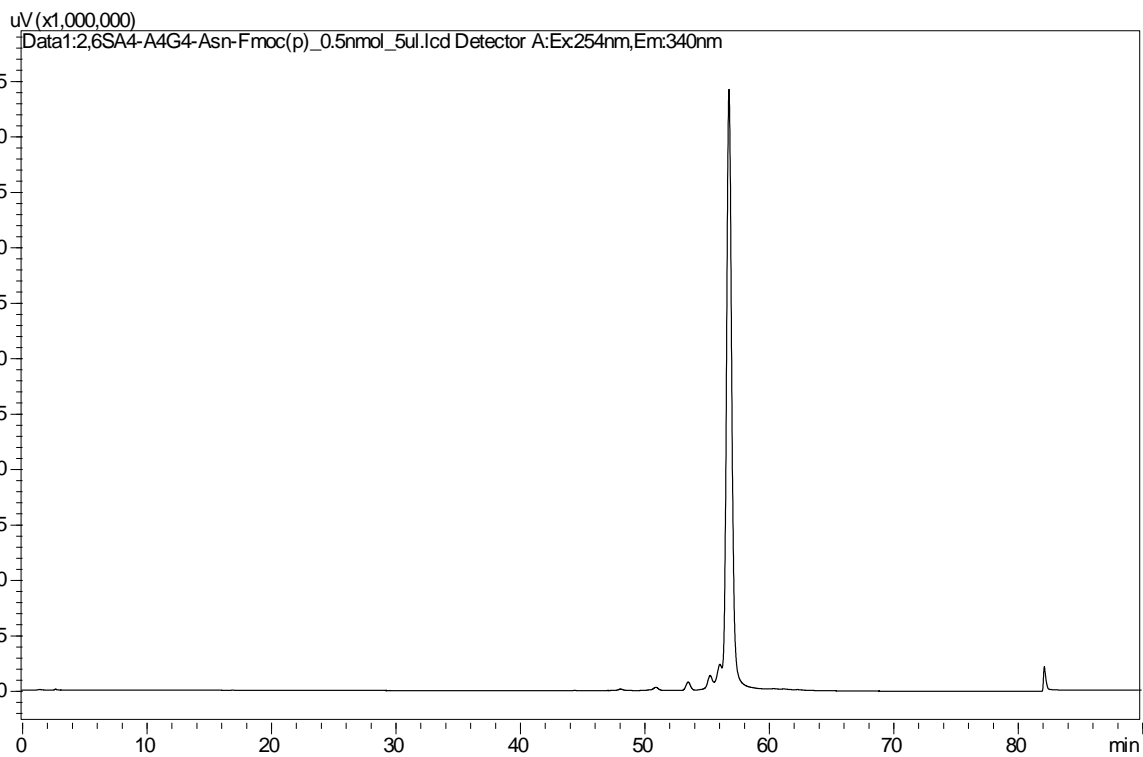

# 29a. 2,6SA2-A2G2F-Asn-Fmoc

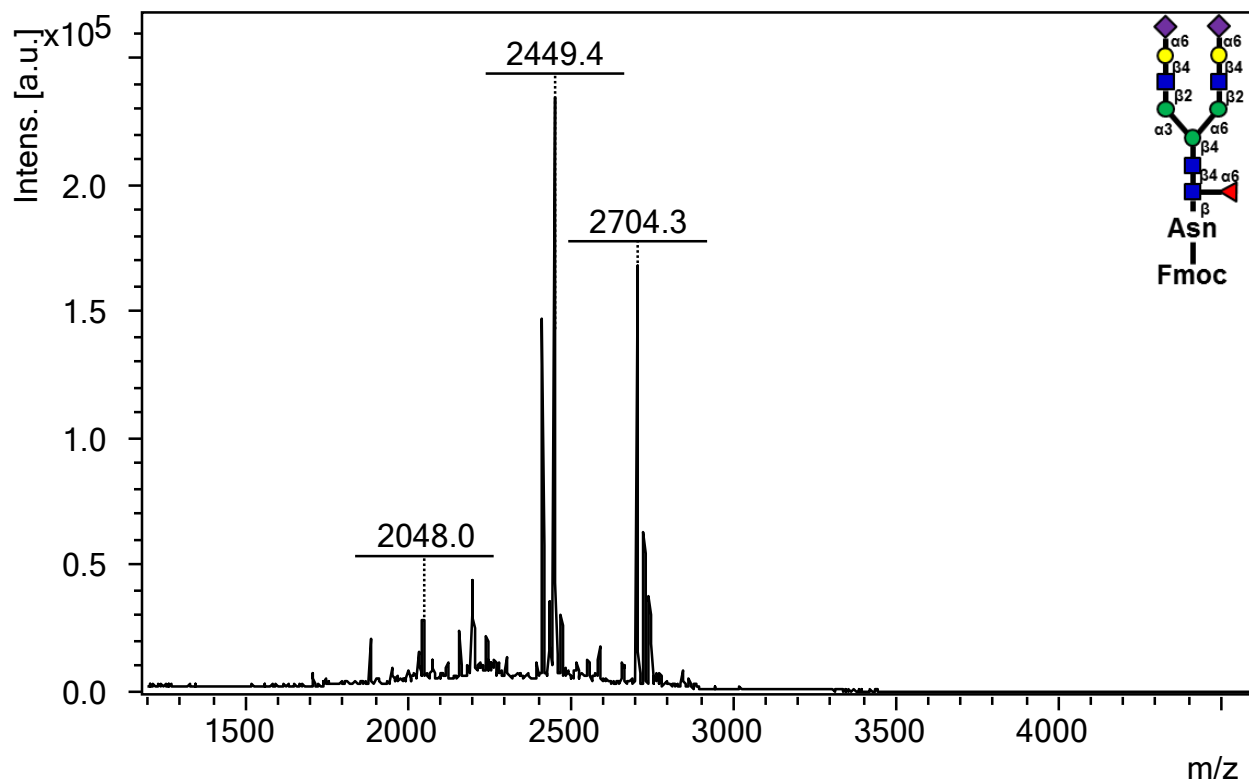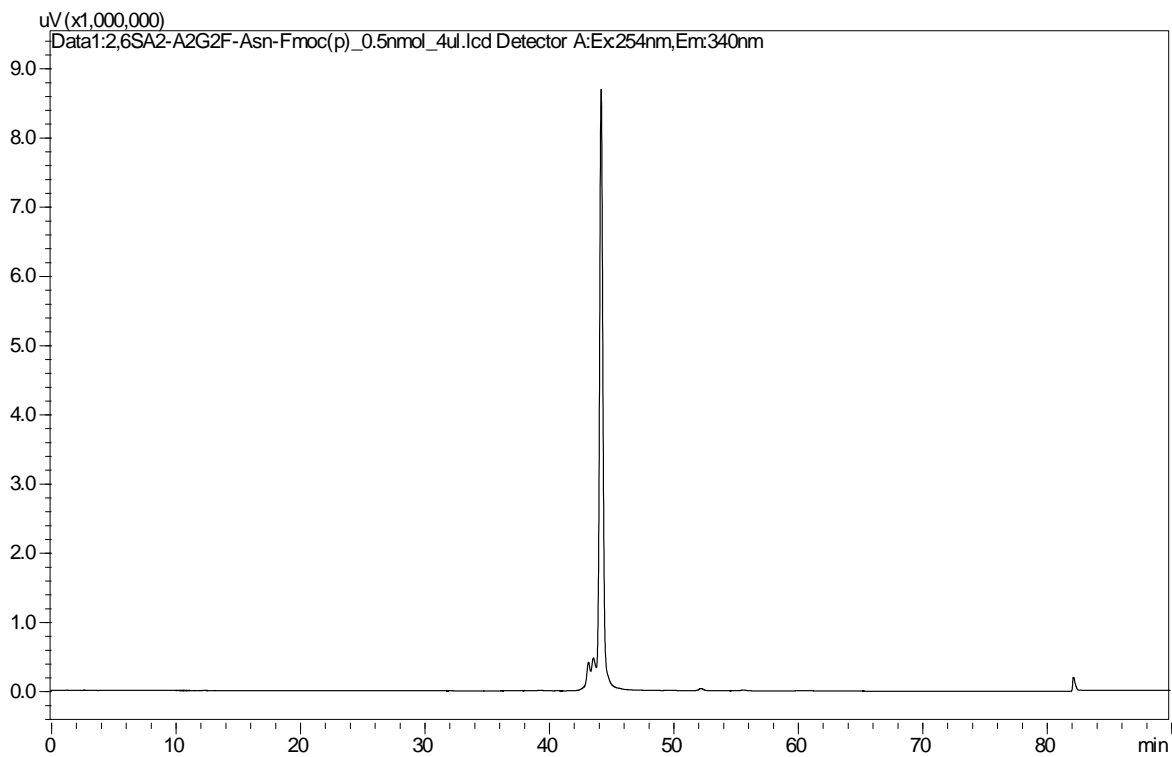

### 30a. 2,6SA3-224A3G3F-Asn-Fmoc

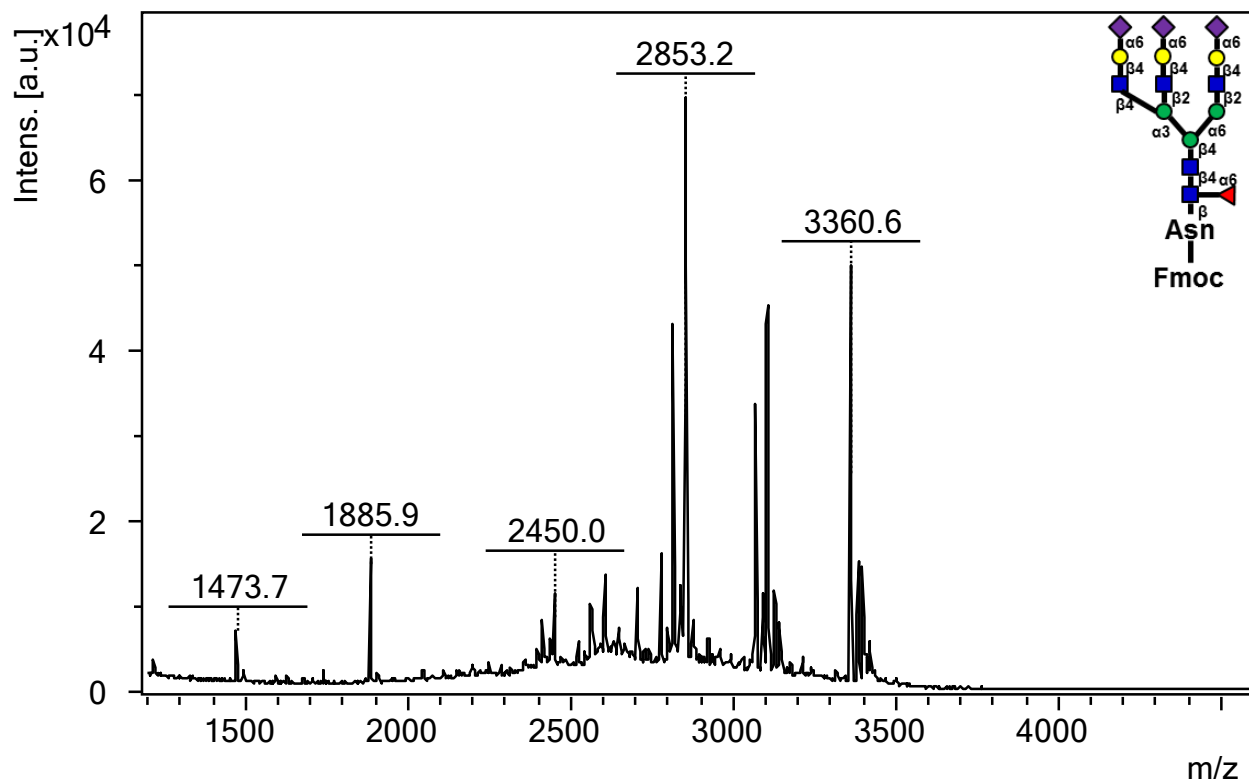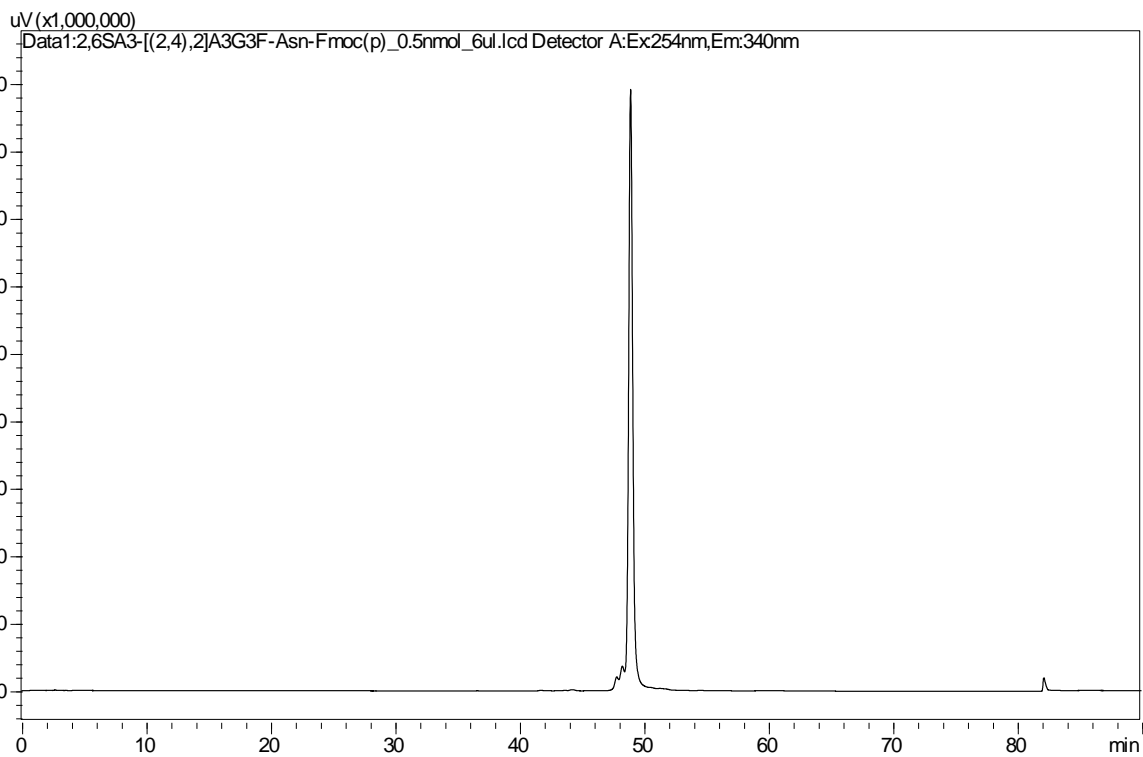

### 31a. 2,6SA3-226A3G3F-Asn-Fmoc

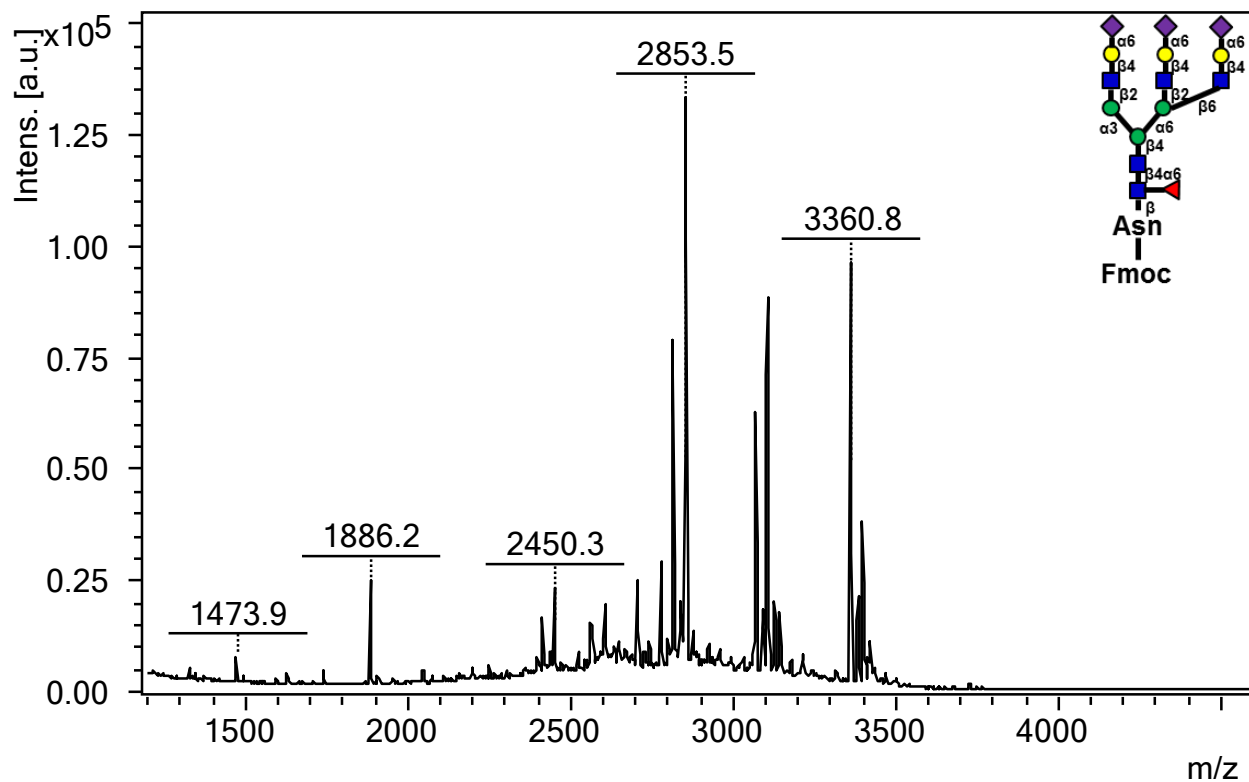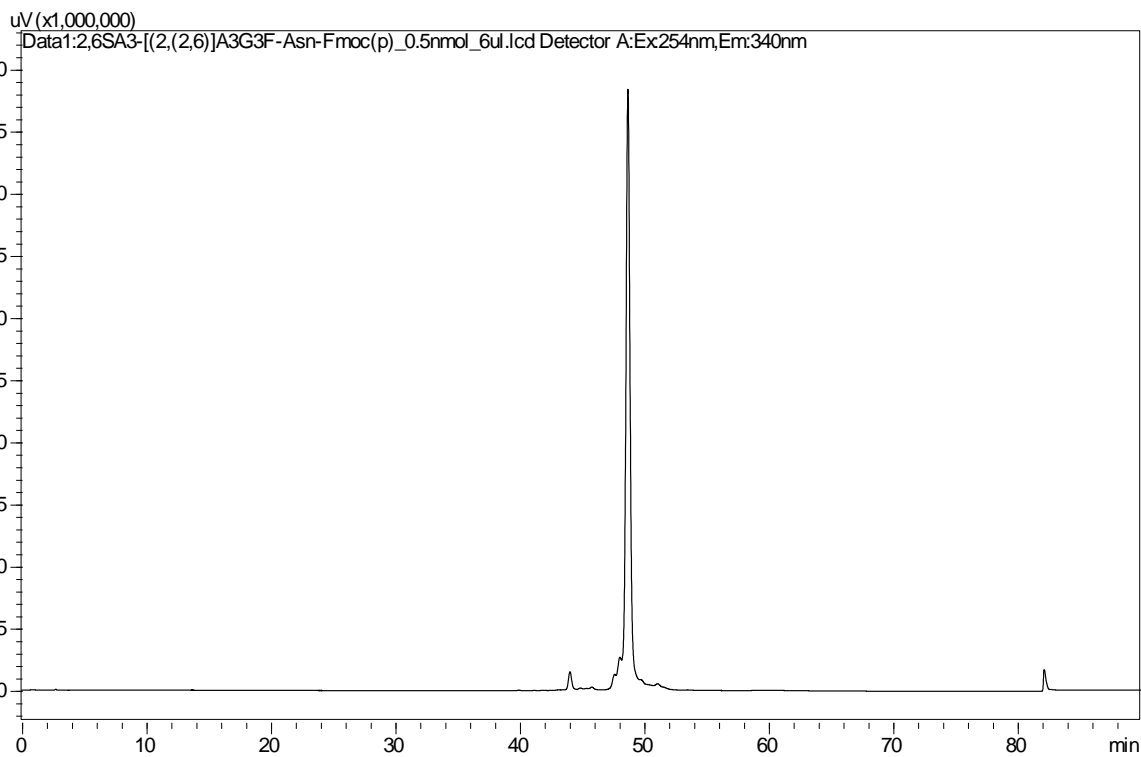

### 32a. 2,6SA4-A4G4F-Asn-Fmoc

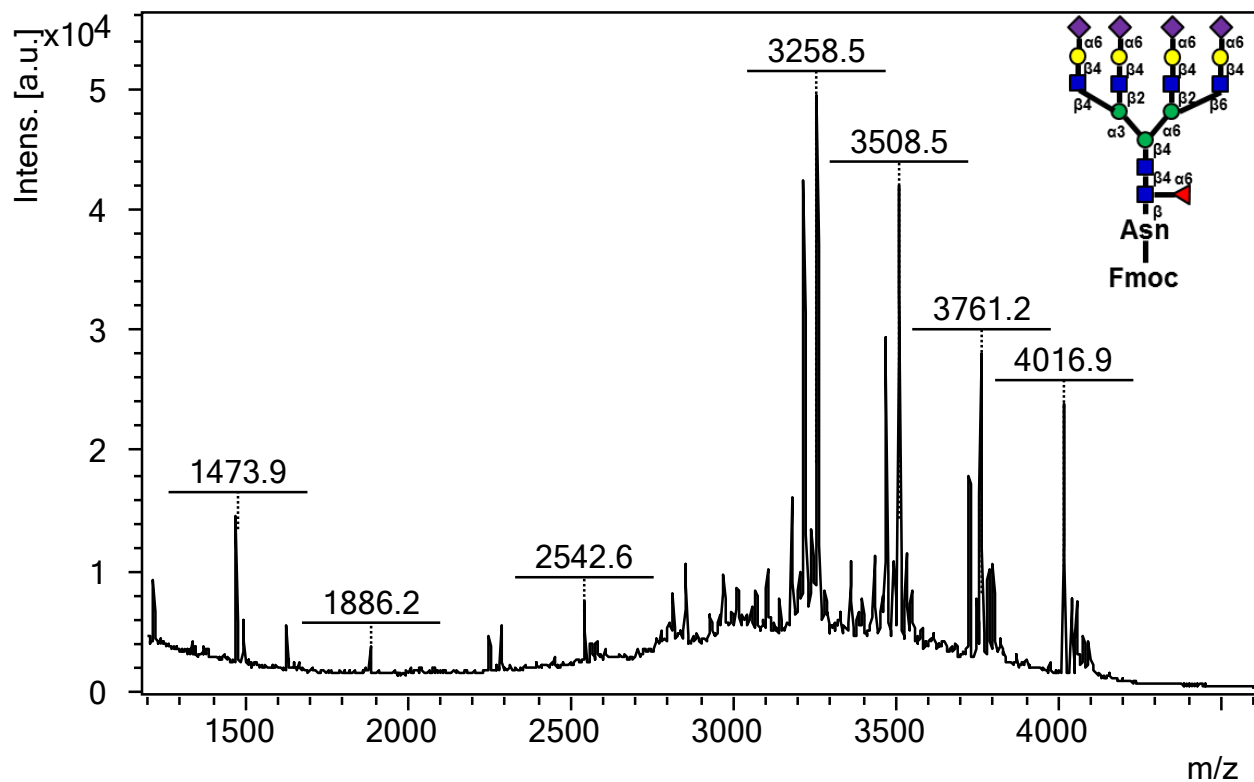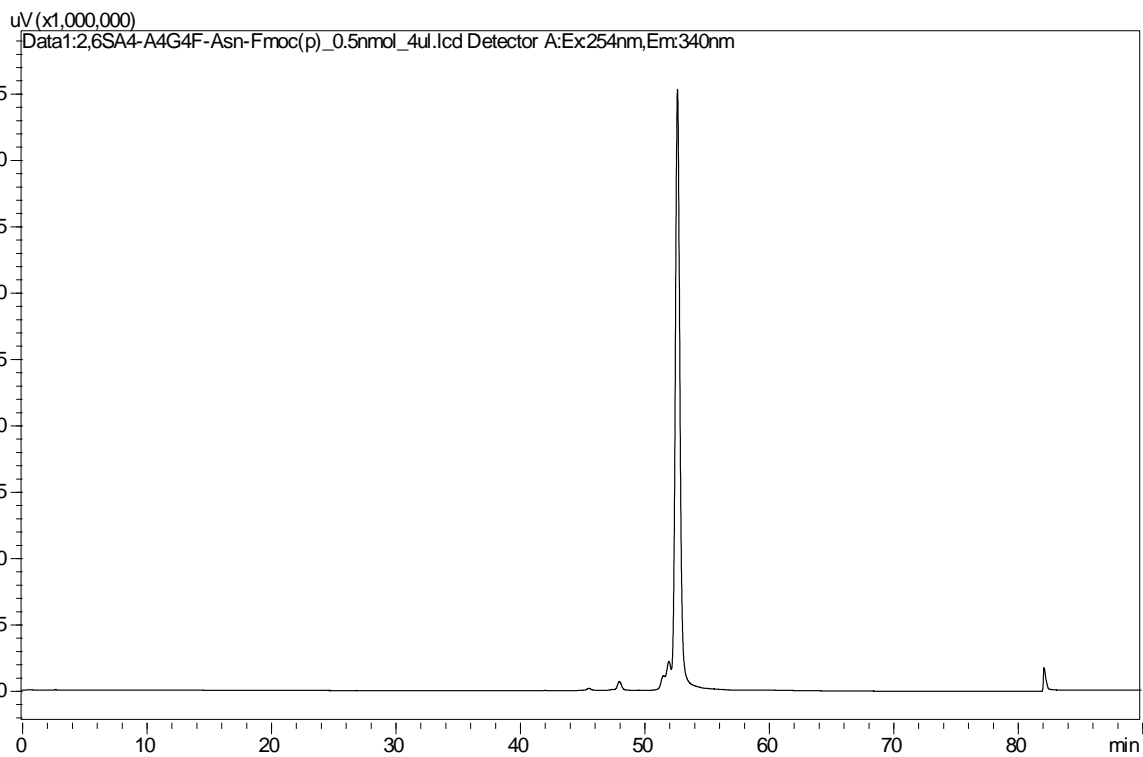



### 33a. Man3-Asn-Fmoc

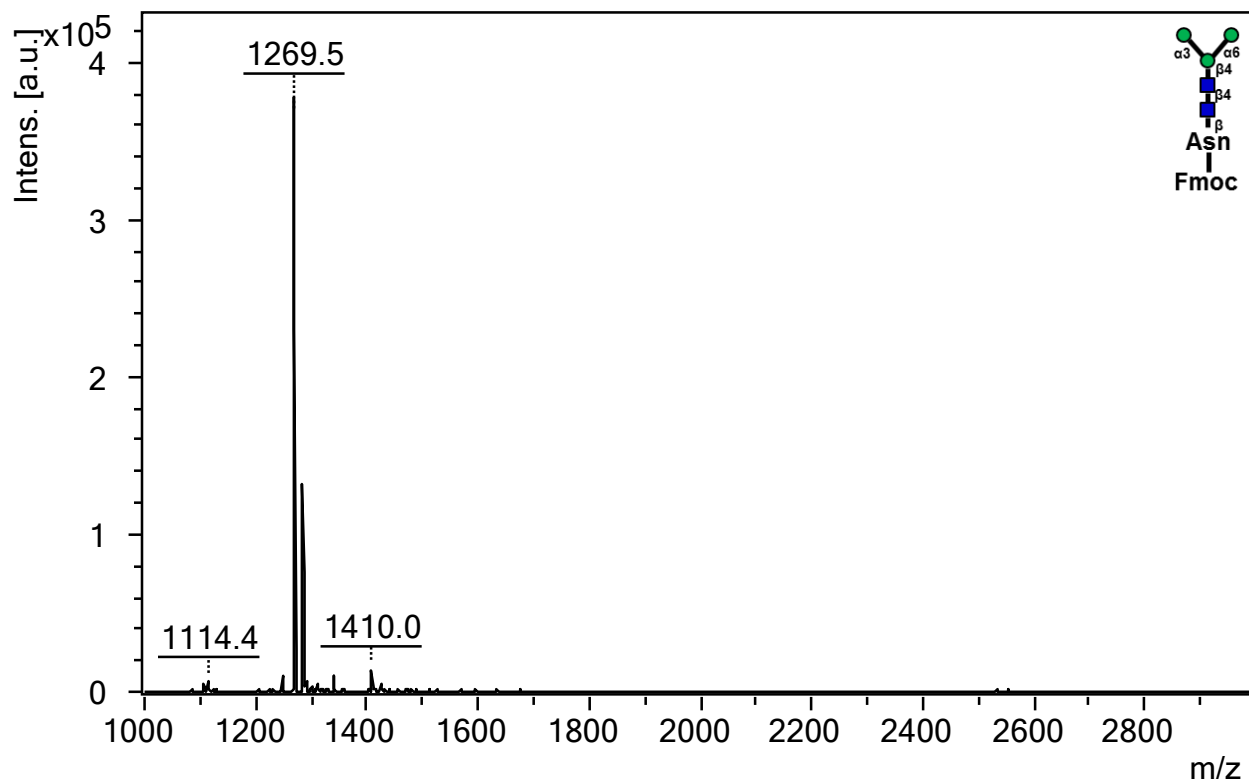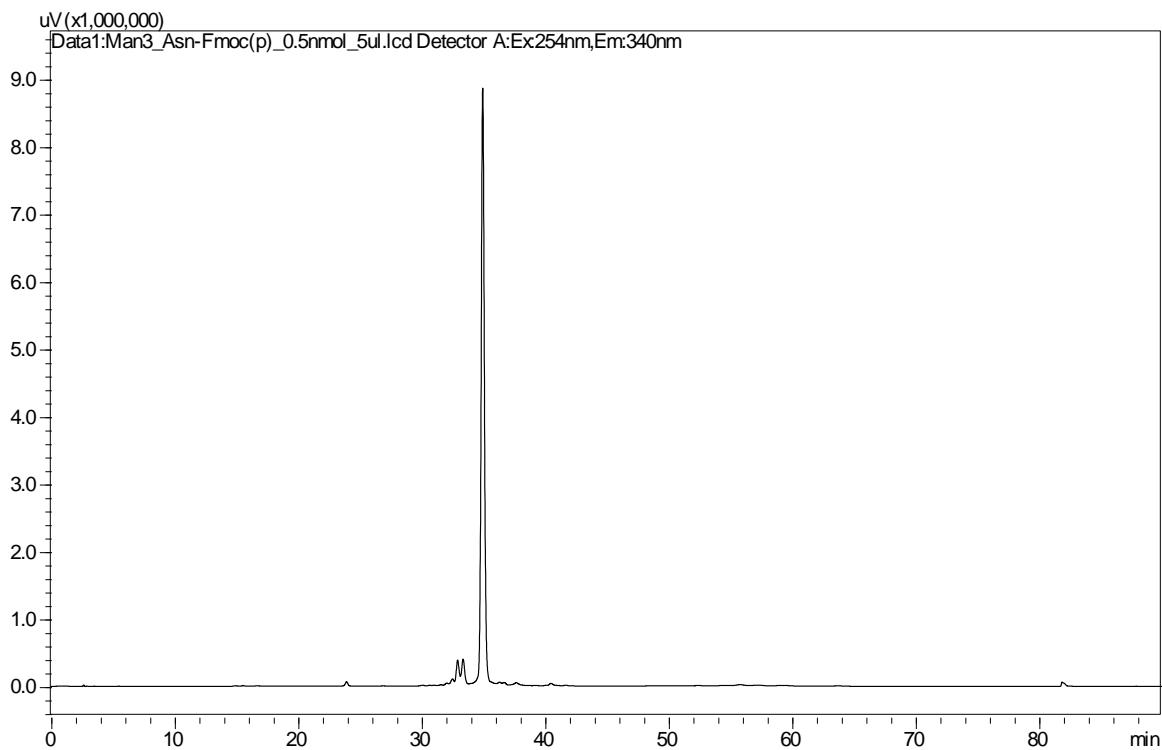

Supplement: NIHMS1638514-supplement-Gao_supplementary_materials-_HPLC.pdf [file NIHMS1638514-supplement-Gao_supplementary_materials-_HPLC.pdf]
