# Supplementary material
Source: PubMed Central journal article supplement (PMC7597375)

$^1\text{H}$  NMR ( $\text{D}_2\text{O}$ , 600M Hz)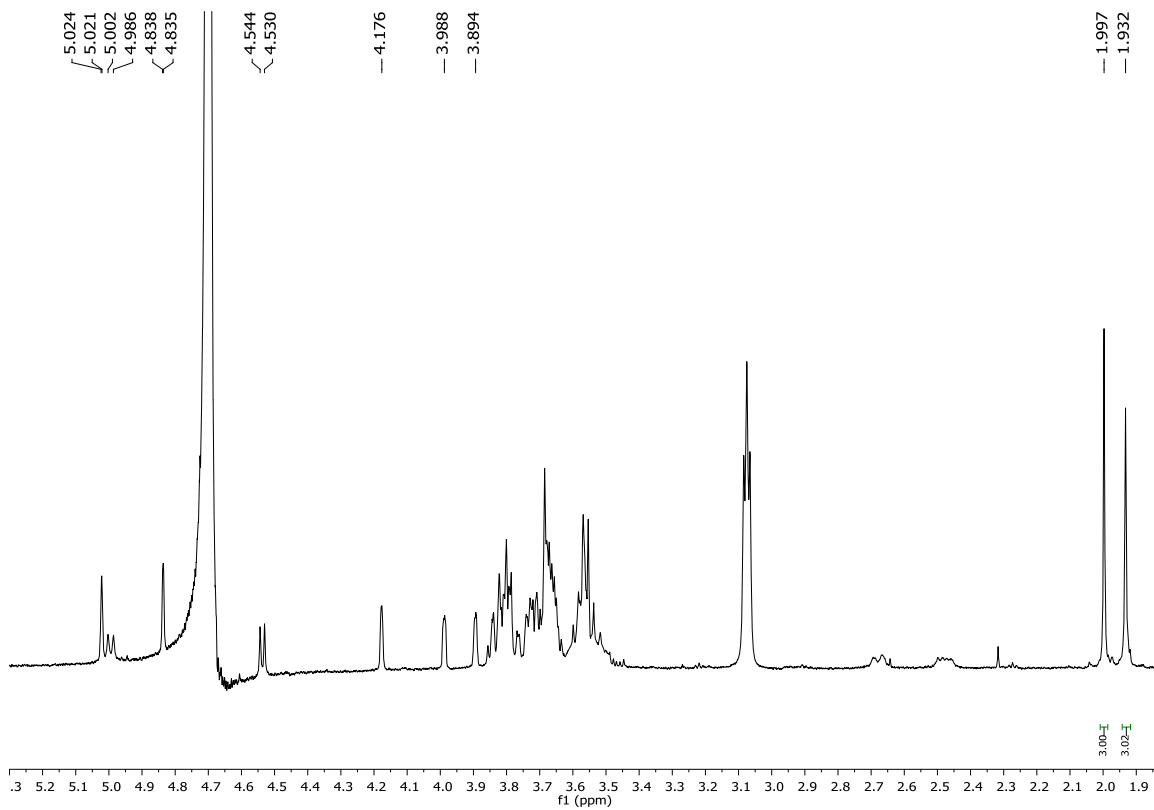 $^1\text{H}$ - $^1\text{H}$  COSY ( $\text{D}_2\text{O}$ , 600M Hz)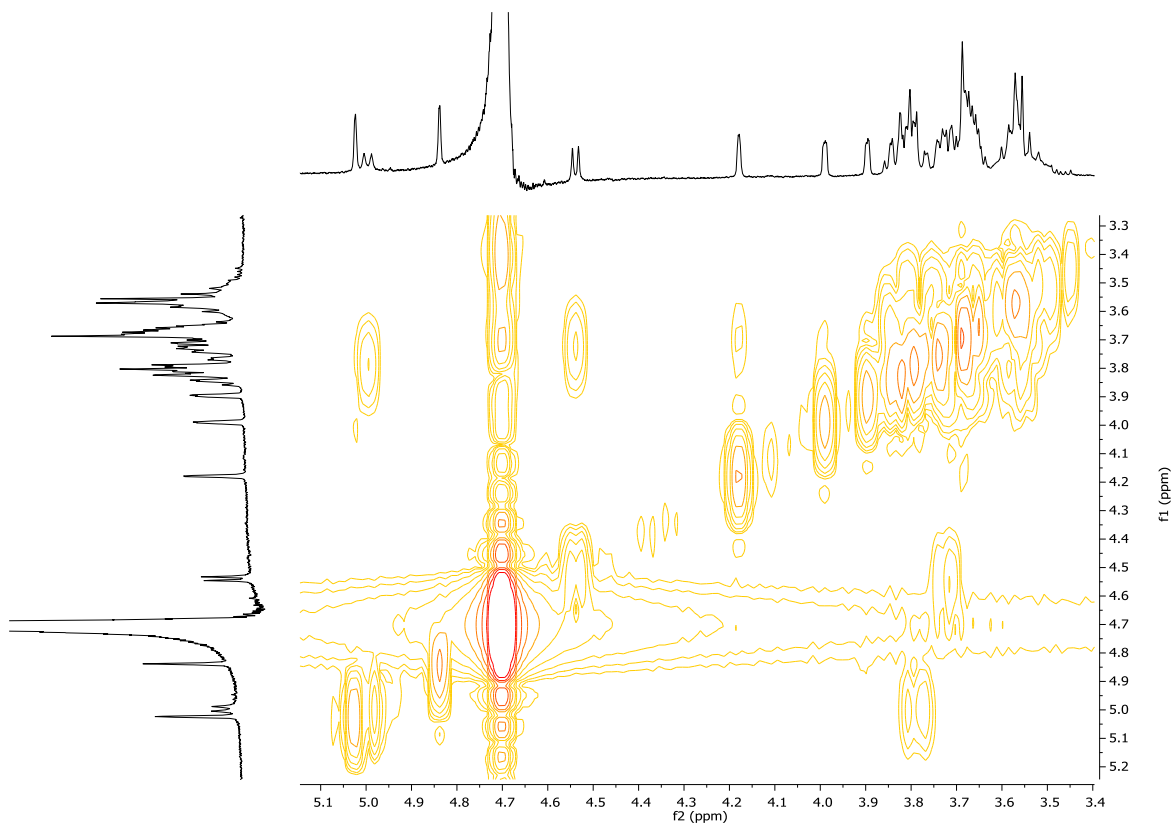

$^1\text{H}$ - $^1\text{H}$  TOSY ( $\text{D}_2\text{O}$ , 600M Hz)

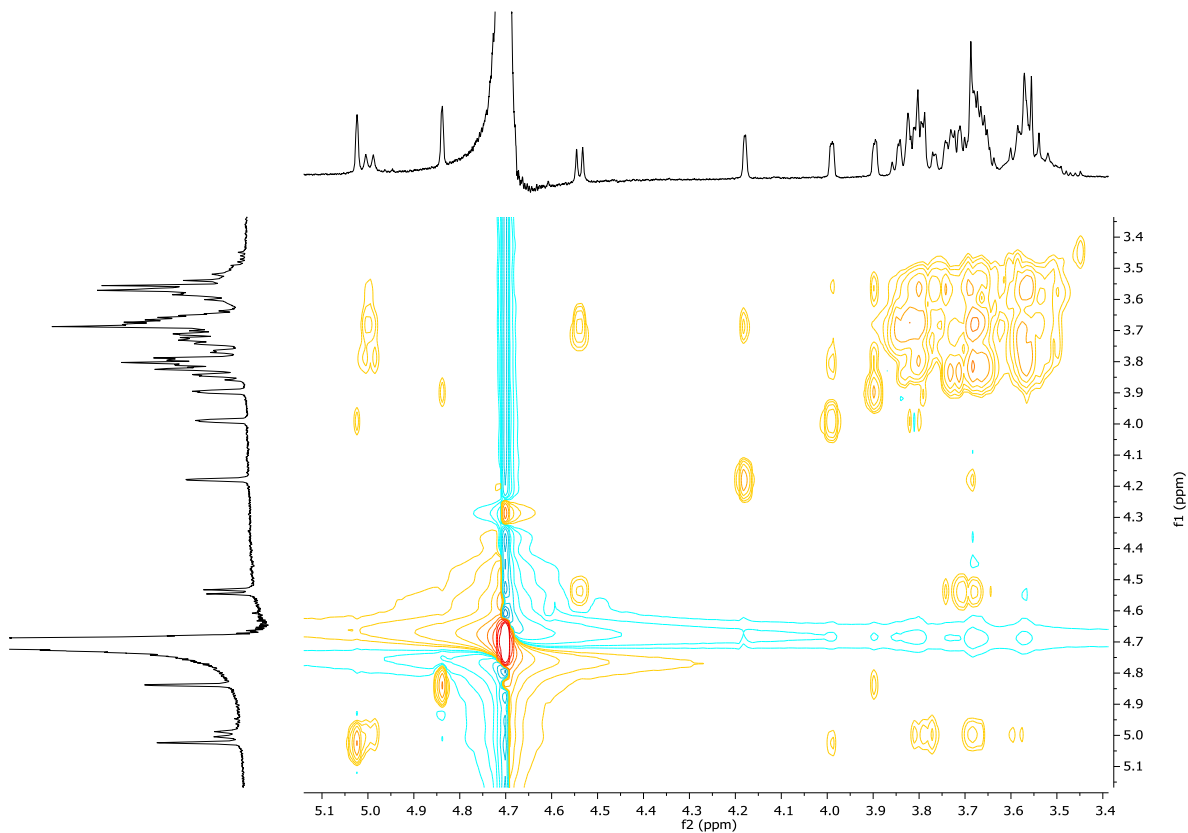

$^1\text{H}$ - $^{13}\text{C}$  HSQC ( $\text{D}_2\text{O}$ , 600M Hz)

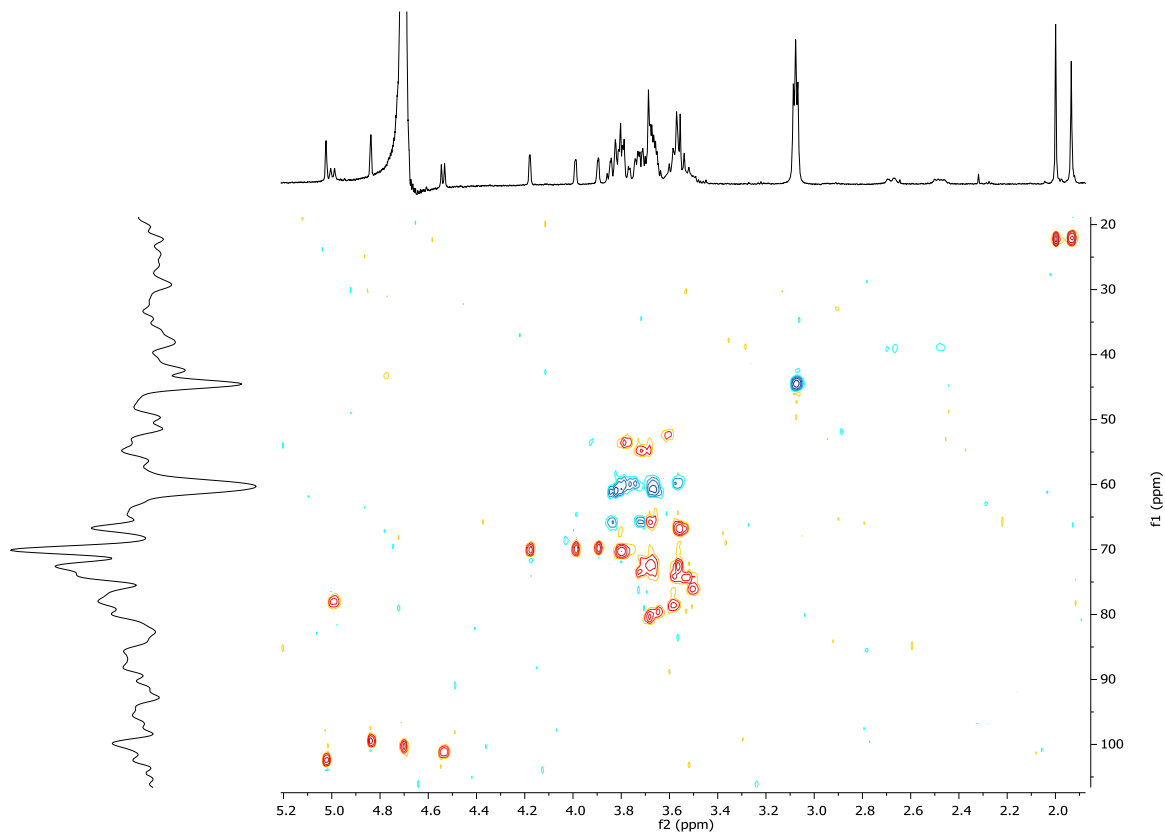

$^1\text{H}$  NMR ( $\text{D}_2\text{O}$ , 600M Hz)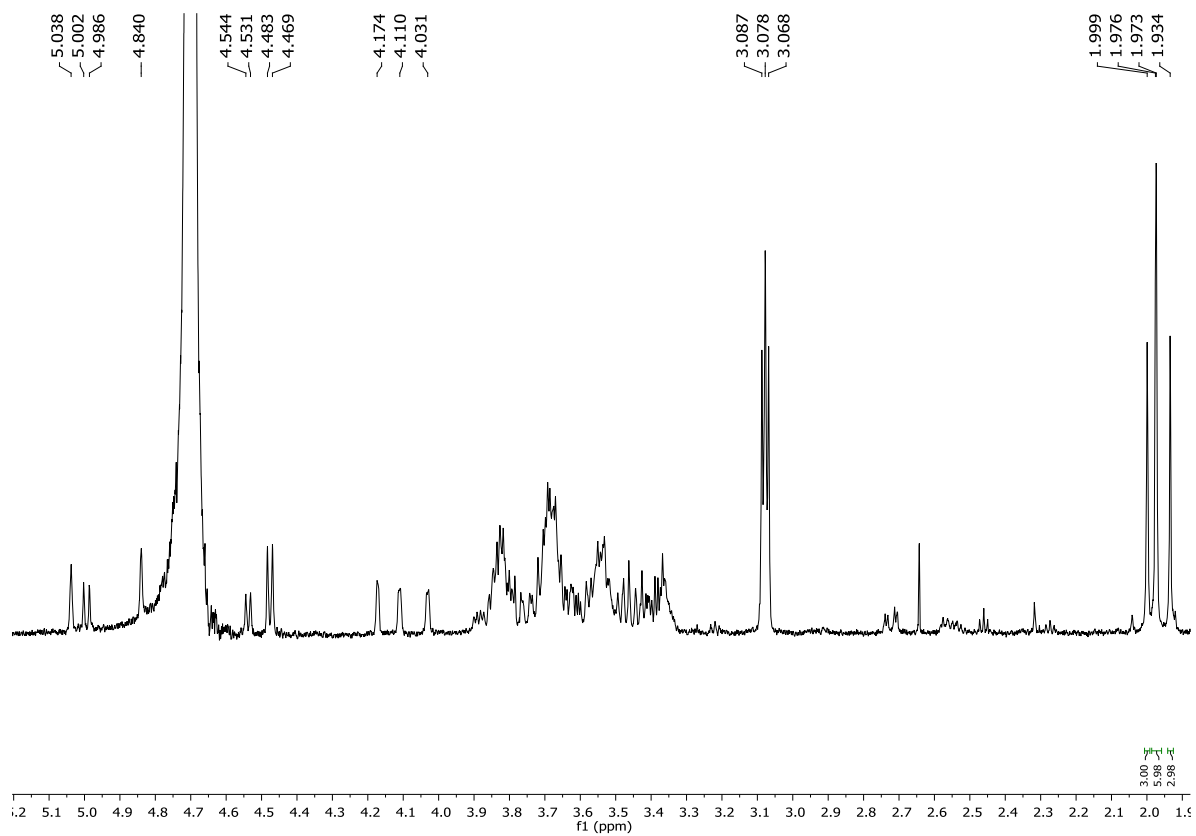 $^1\text{H}$ - $^1\text{H}$  COSY ( $\text{D}_2\text{O}$ , 600M Hz)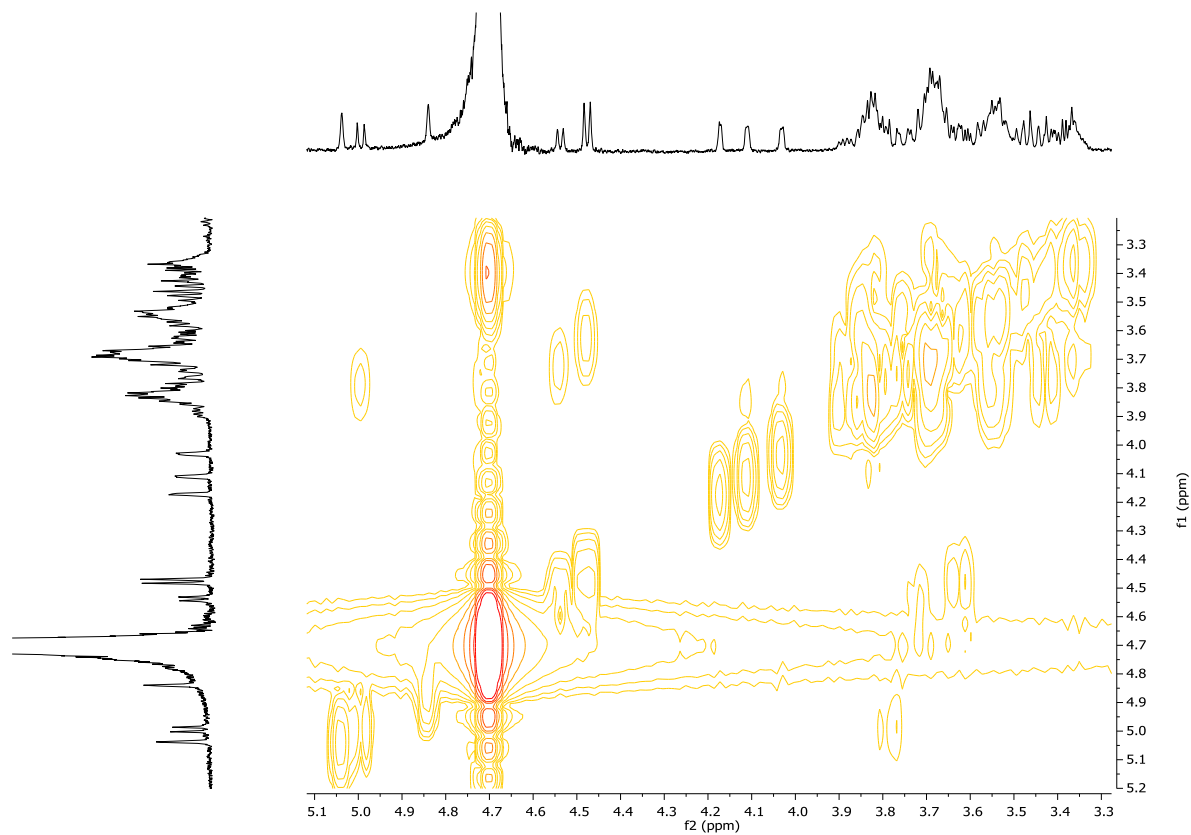

$^1\text{H}$ - $^1\text{H}$  TCOZY ( $\text{D}_2\text{O}$ , 600M Hz)

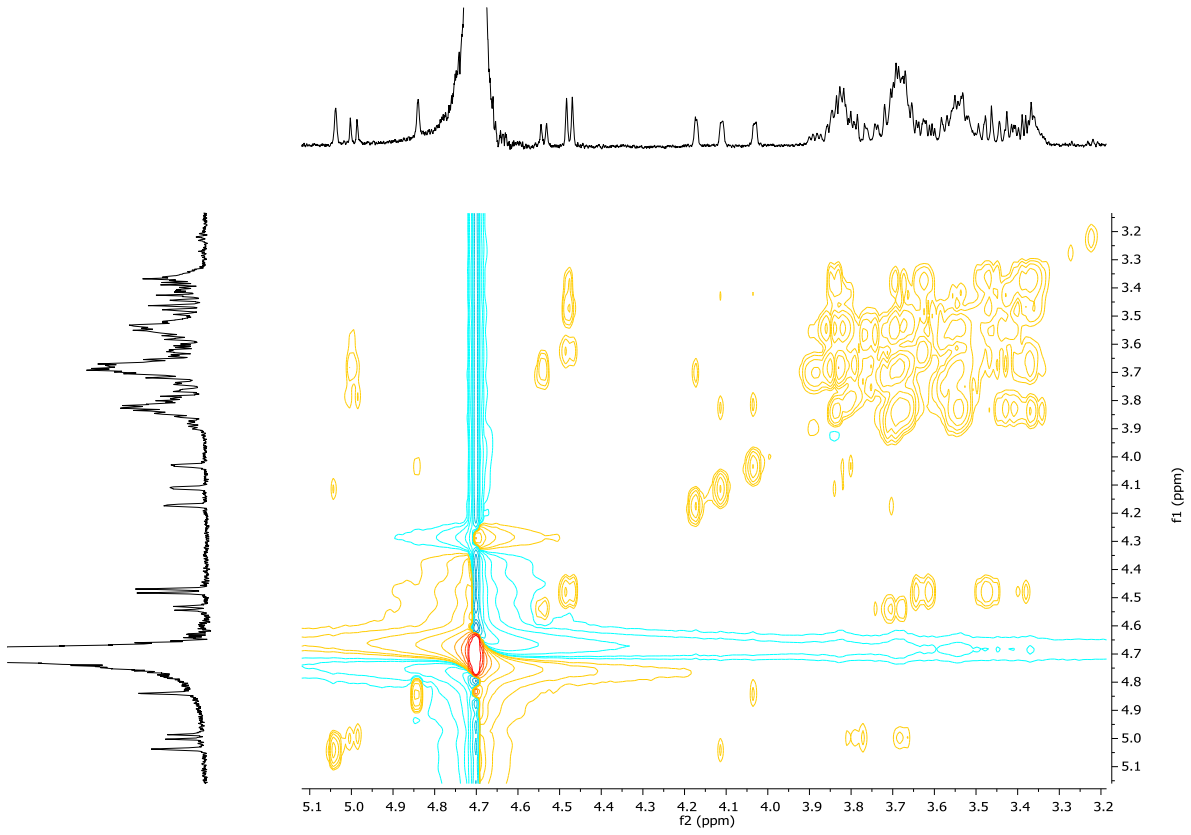

$^1\text{H}$ - $^{13}\text{C}$  HSQC ( $\text{D}_2\text{O}$ , 600M Hz)

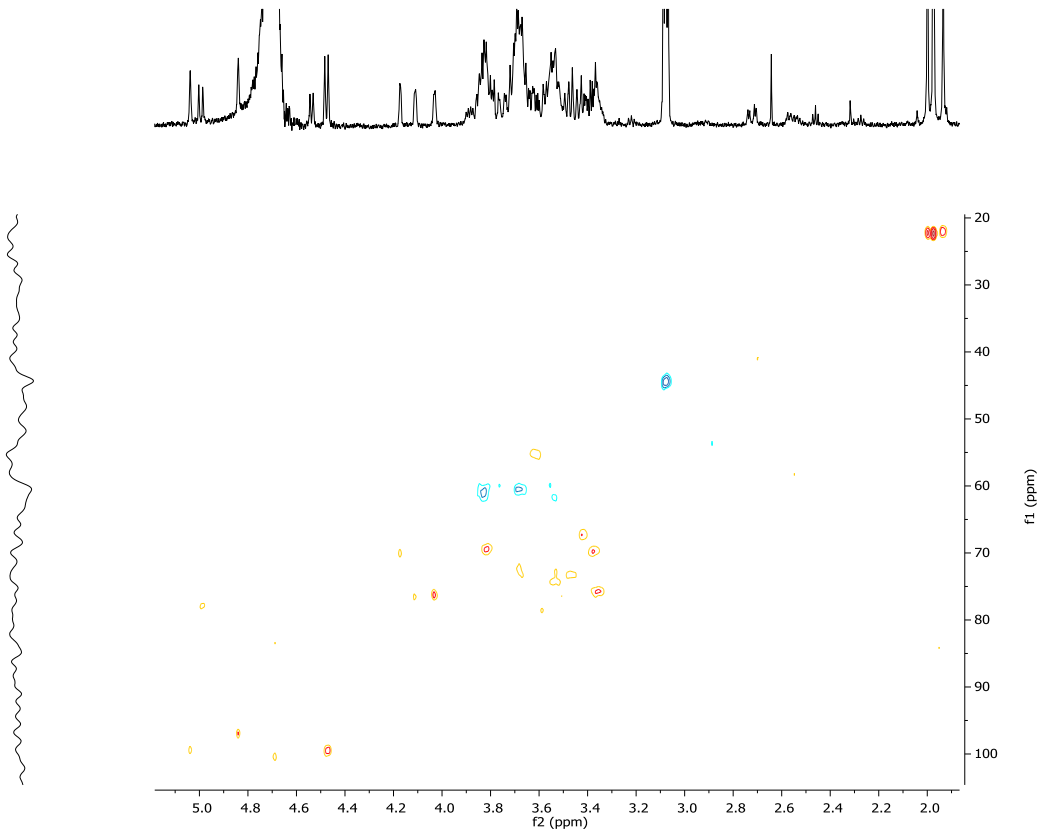

$^1\text{H}$  NMR ( $\text{D}_2\text{O}$ , 600M Hz)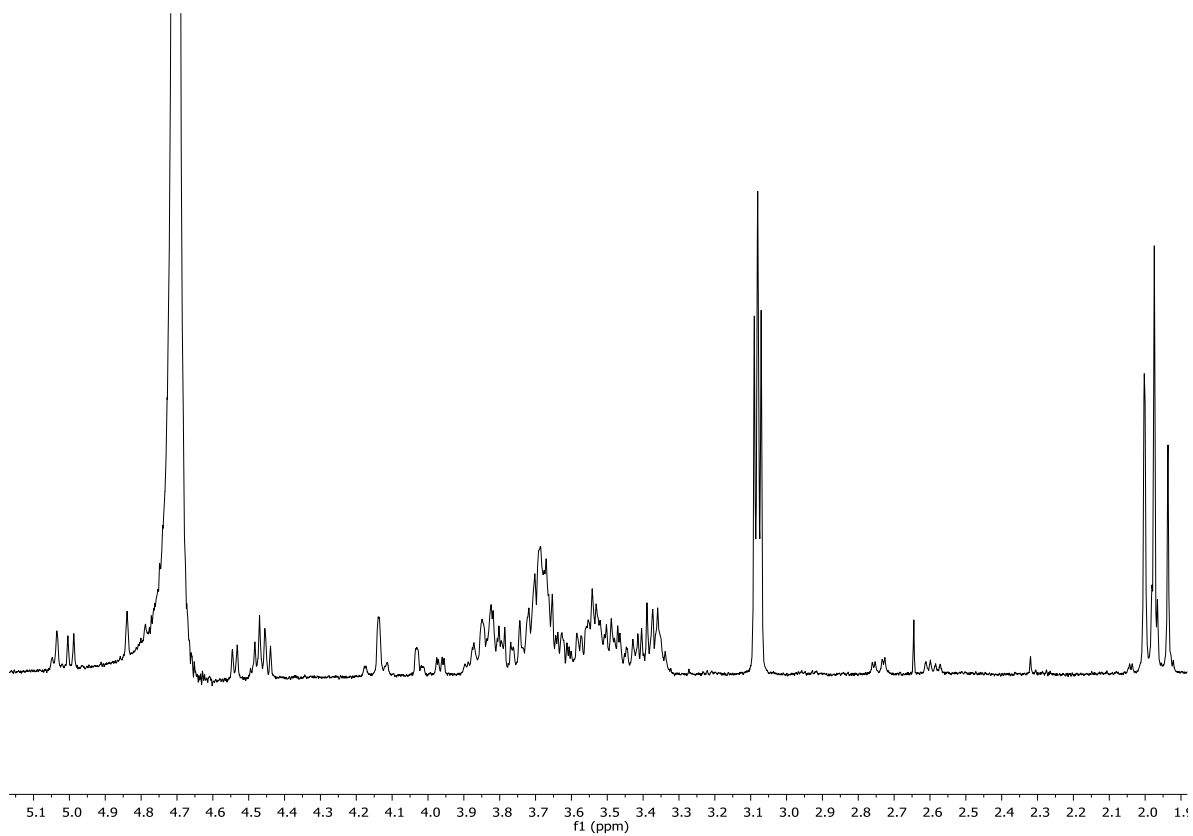 $^1\text{H}$ - $^1\text{H}$  COSY ( $\text{D}_2\text{O}$ , 600M Hz)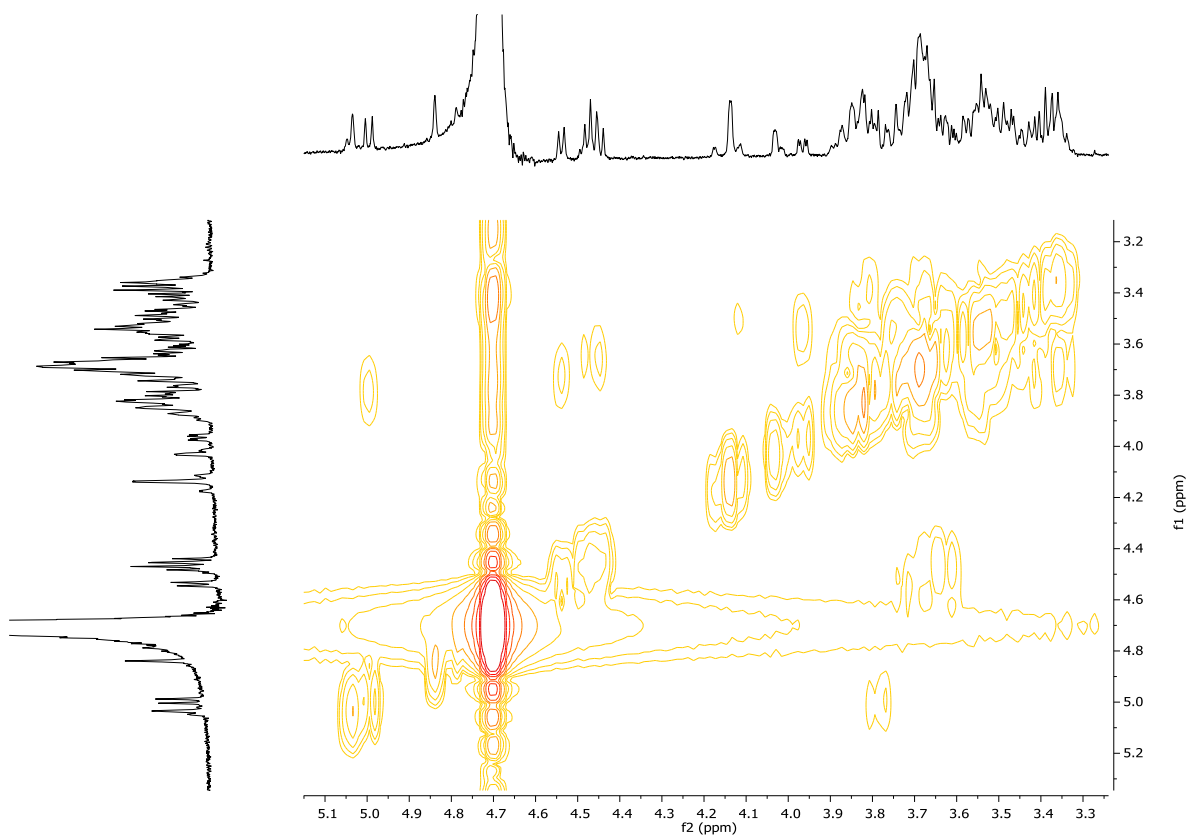

$^1\text{H}$ - $^1\text{H}$  TCOZY ( $\text{D}_2\text{O}$ , 600M Hz)

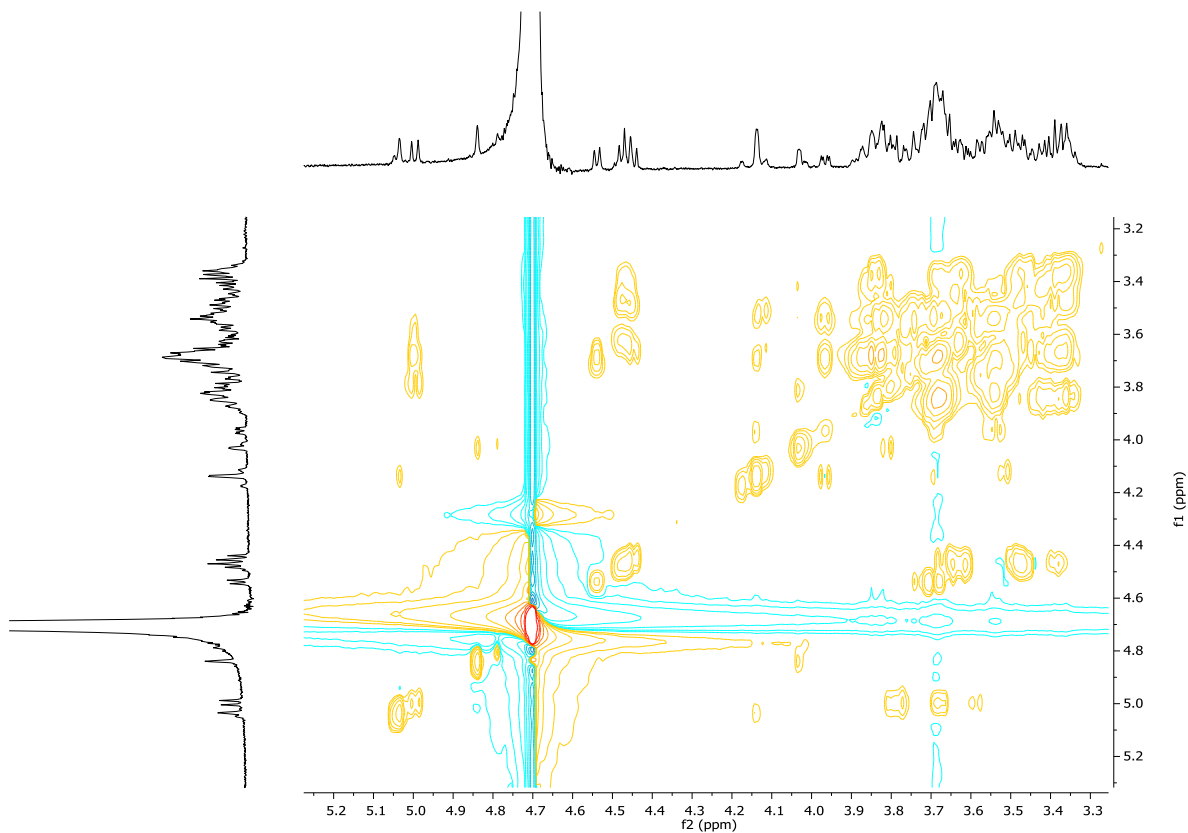

$^1\text{H}$ - $^{13}\text{C}$  HSQC ( $\text{D}_2\text{O}$ , 600M Hz)

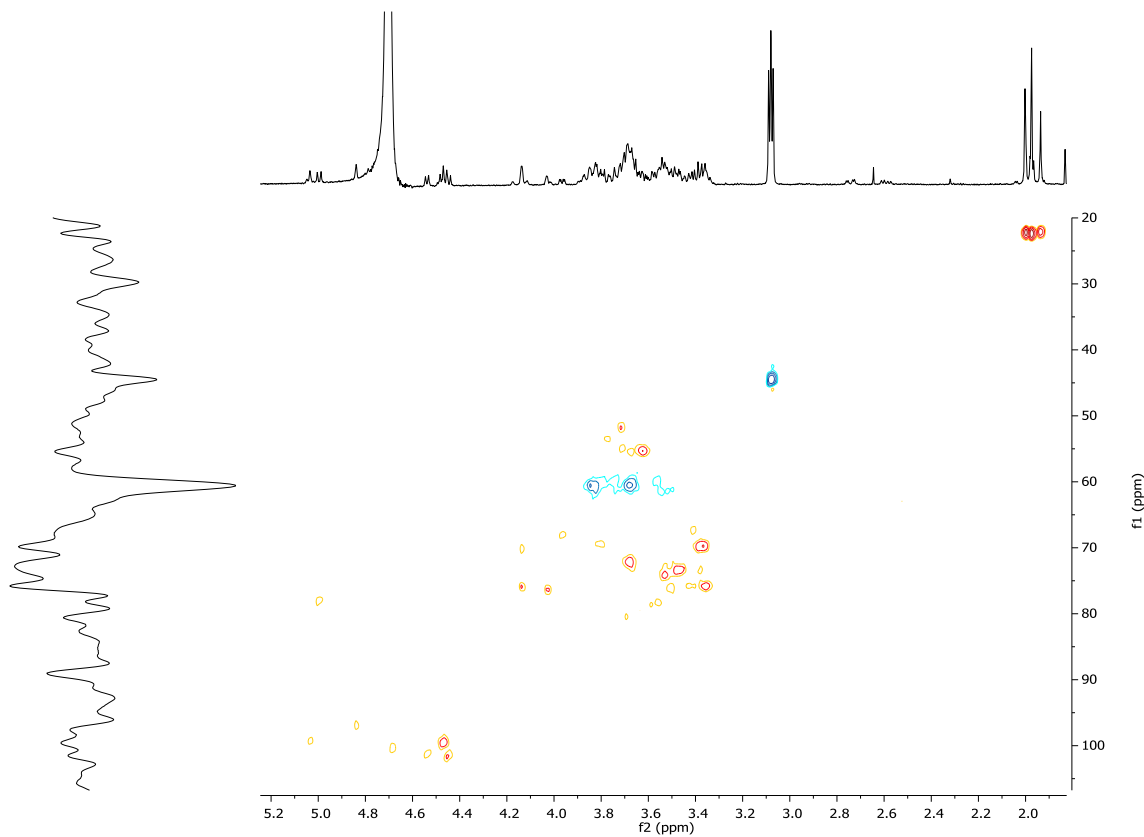

$^1\text{H}$  NMR ( $\text{D}_2\text{O}$ , 600M Hz)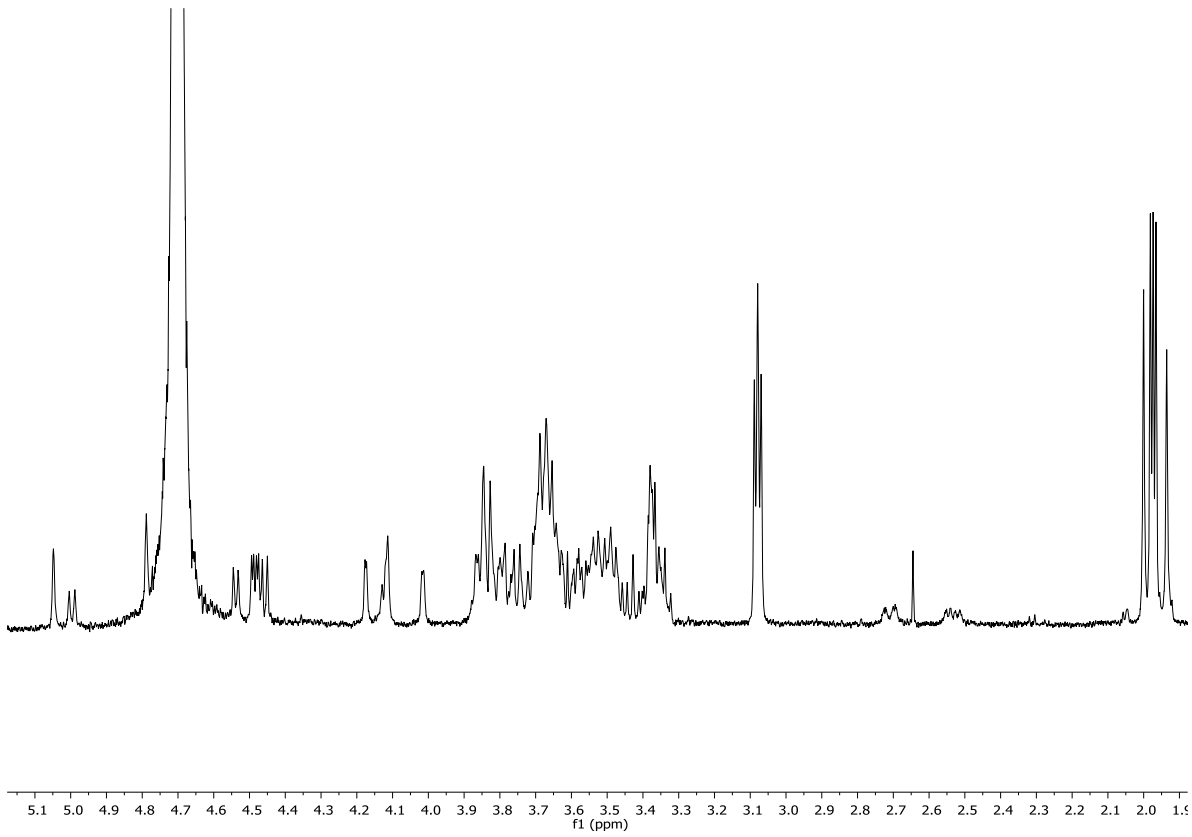 $^1\text{H}$ - $^1\text{H}$  COSY ( $\text{D}_2\text{O}$ , 600M Hz)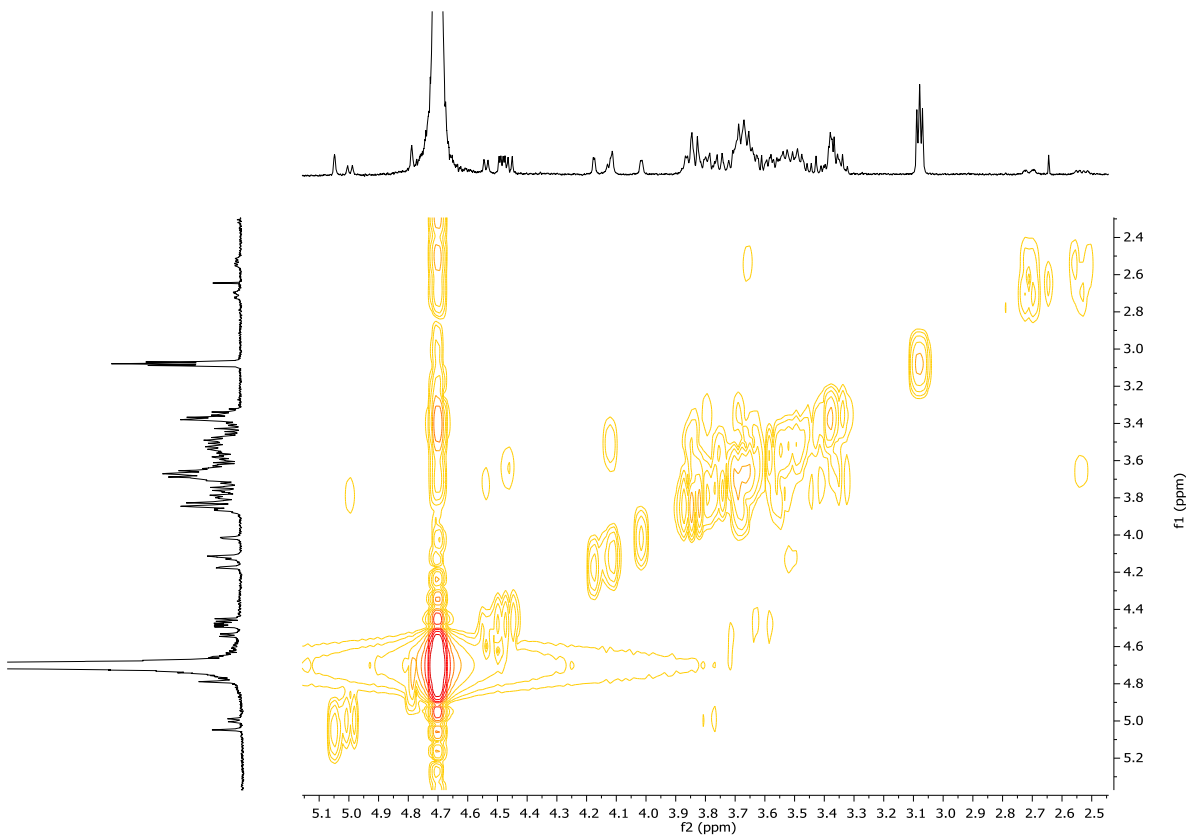

$^1\text{H}$ - $^1\text{H}$  TOSY ( $\text{D}_2\text{O}$ , 600M Hz)

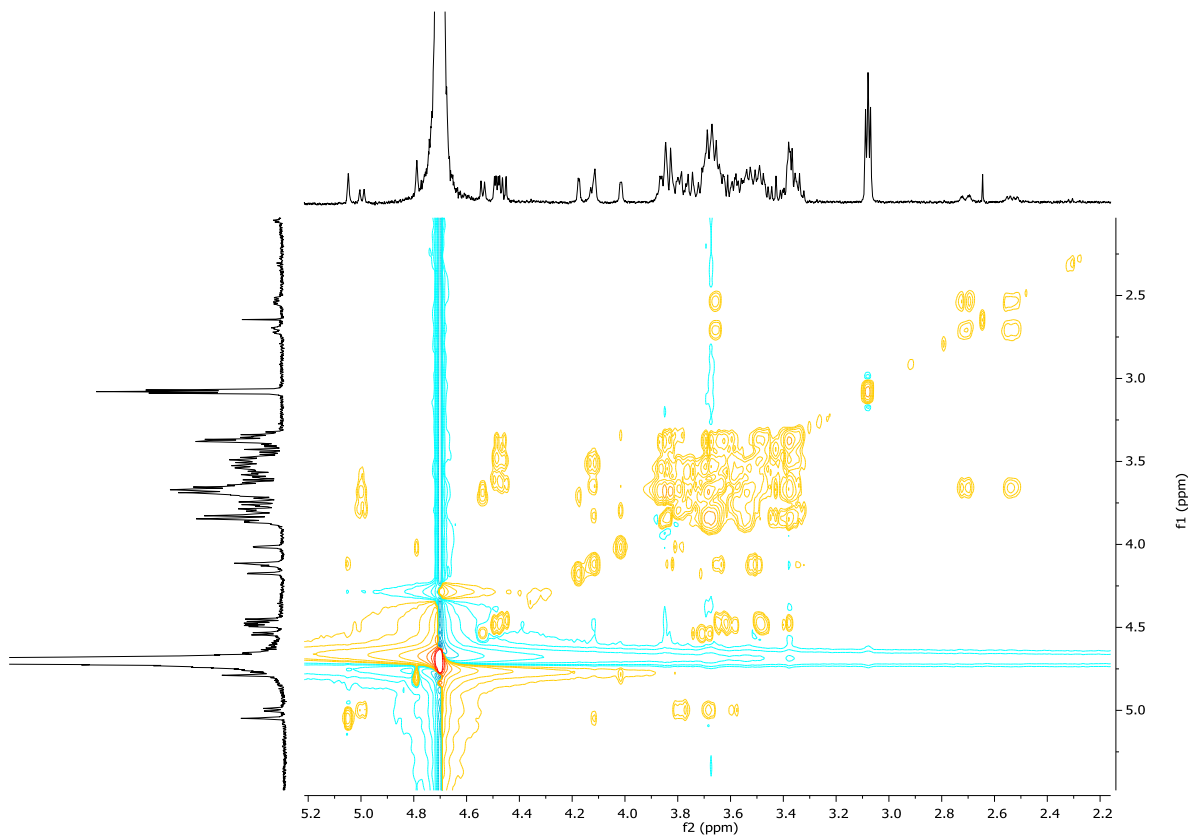

$^1\text{H}$ - $^{13}\text{C}$  HSQC ( $\text{D}_2\text{O}$ , 600M Hz)

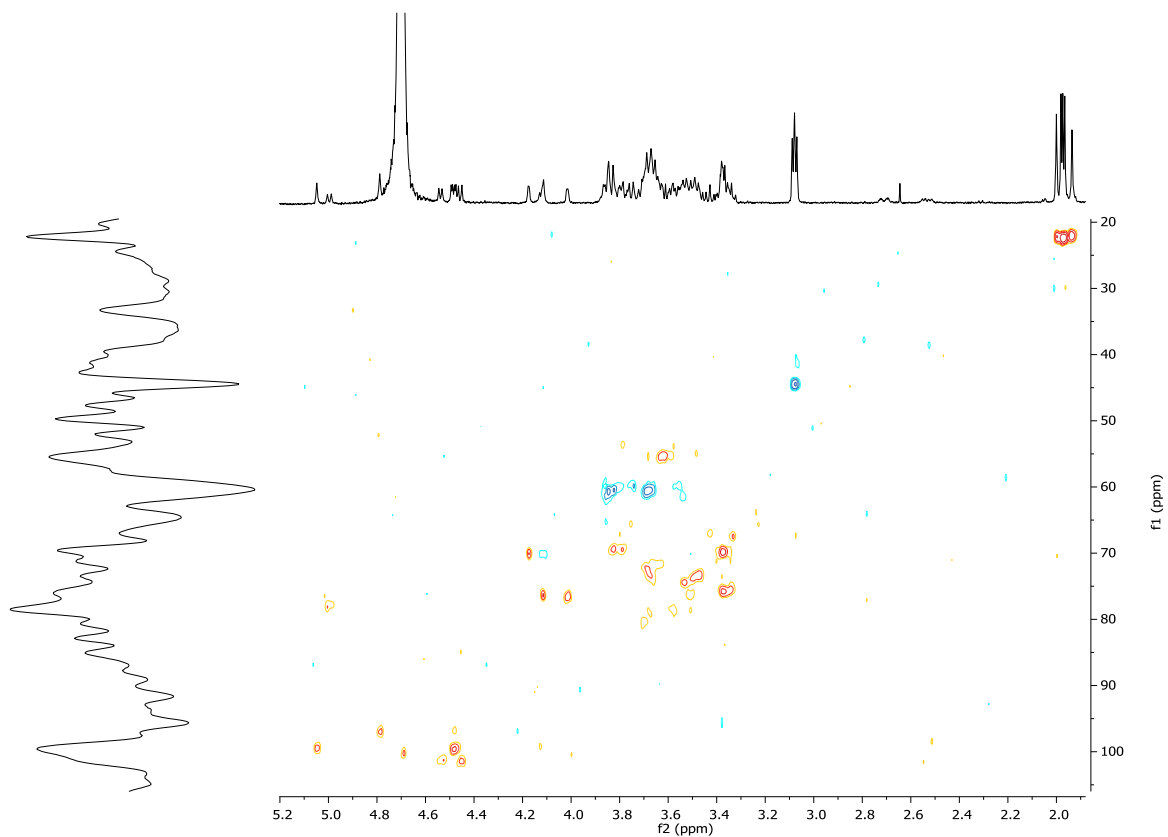



4

$^1\text{H}$  NMR ( $\text{D}_2\text{O}$ , 600M Hz)

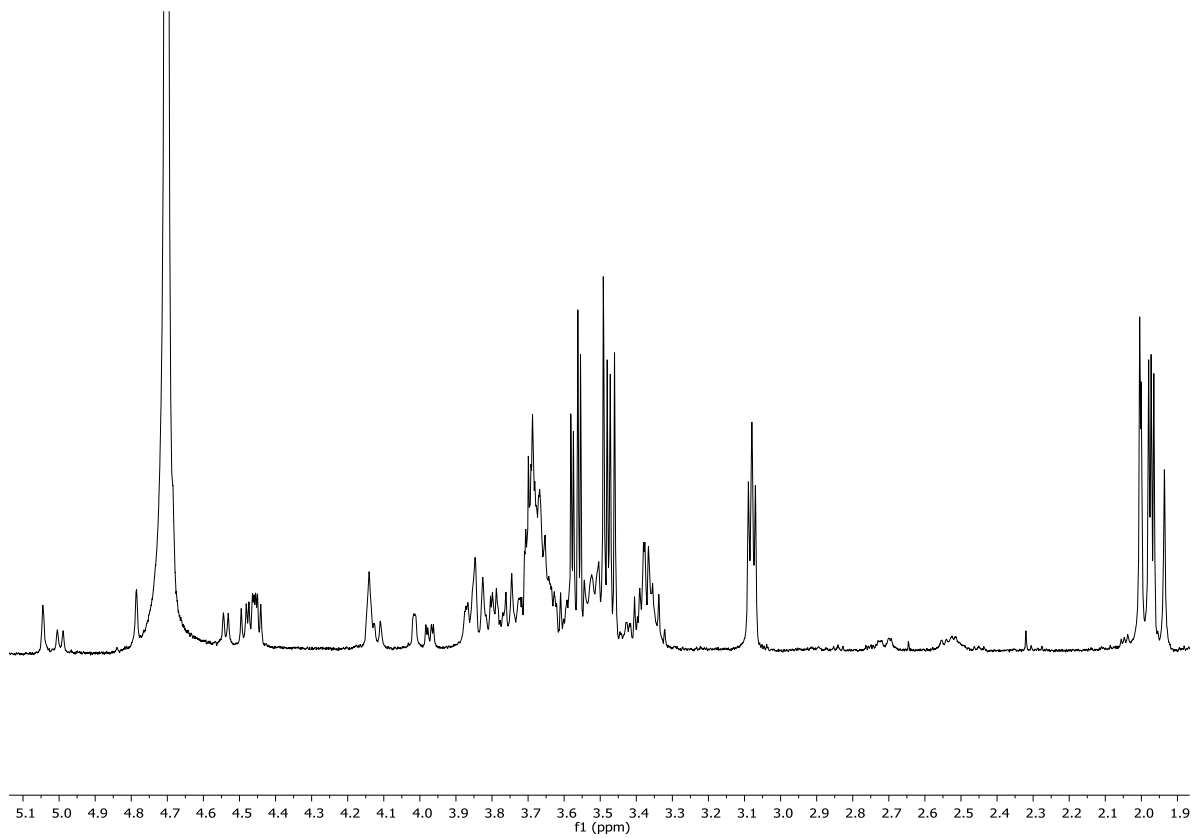

5

$^1\text{H}$  NMR ( $\text{D}_2\text{O}$ , 600M Hz)

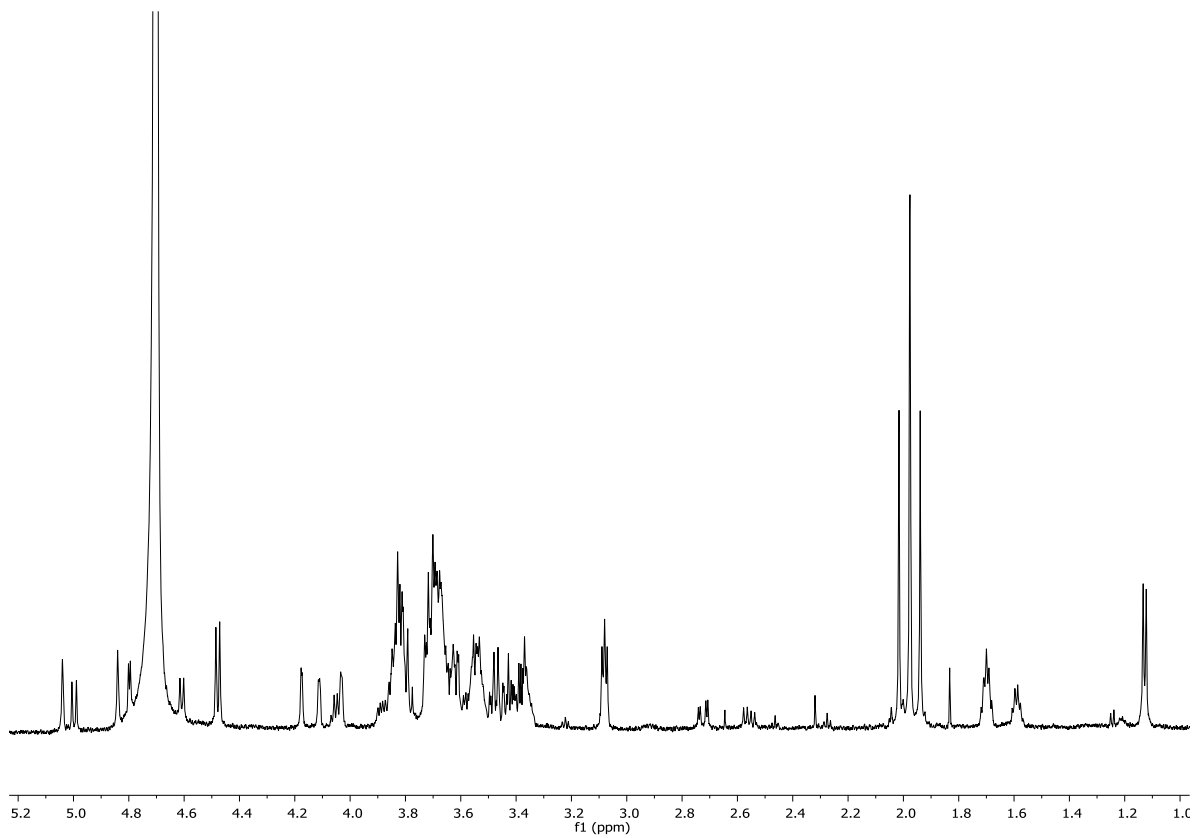

6

$^1\text{H}$  NMR ( $\text{D}_2\text{O}$ , 600M Hz)

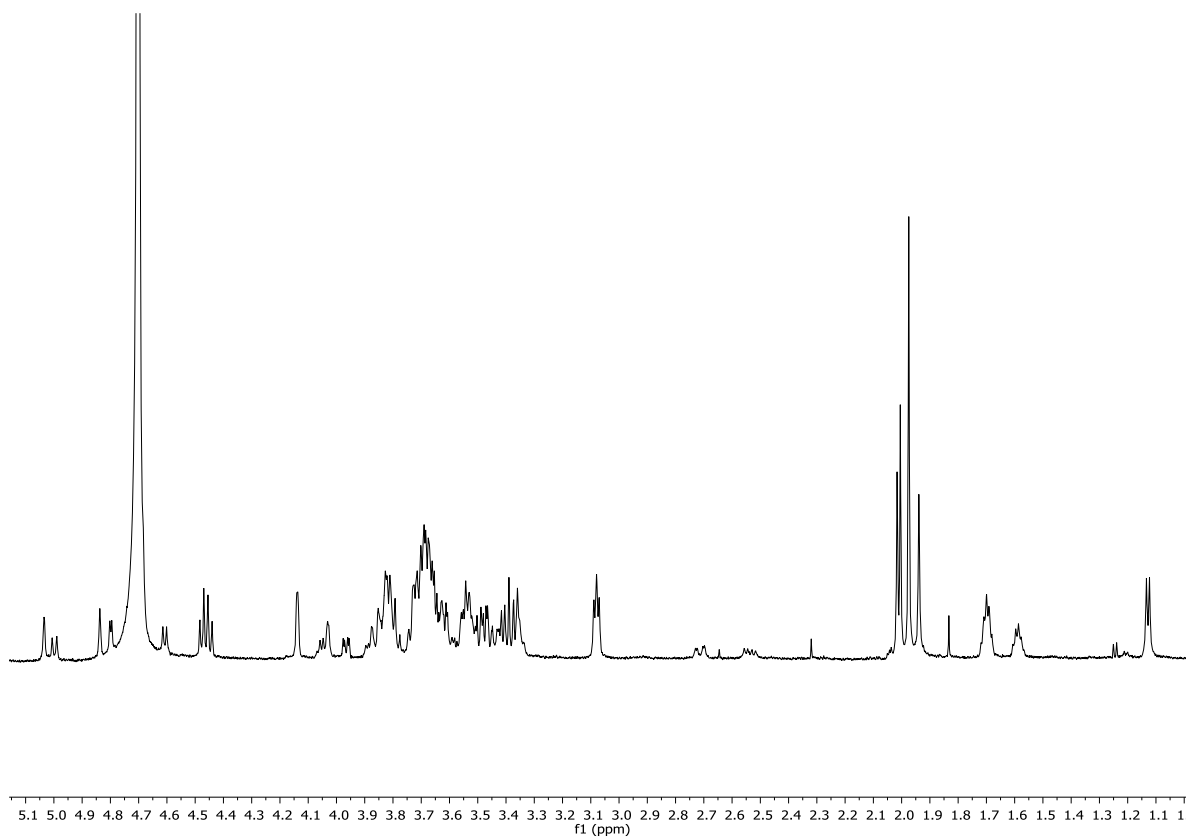

7

$^1\text{H}$  NMR ( $\text{D}_2\text{O}$ , 600M Hz)

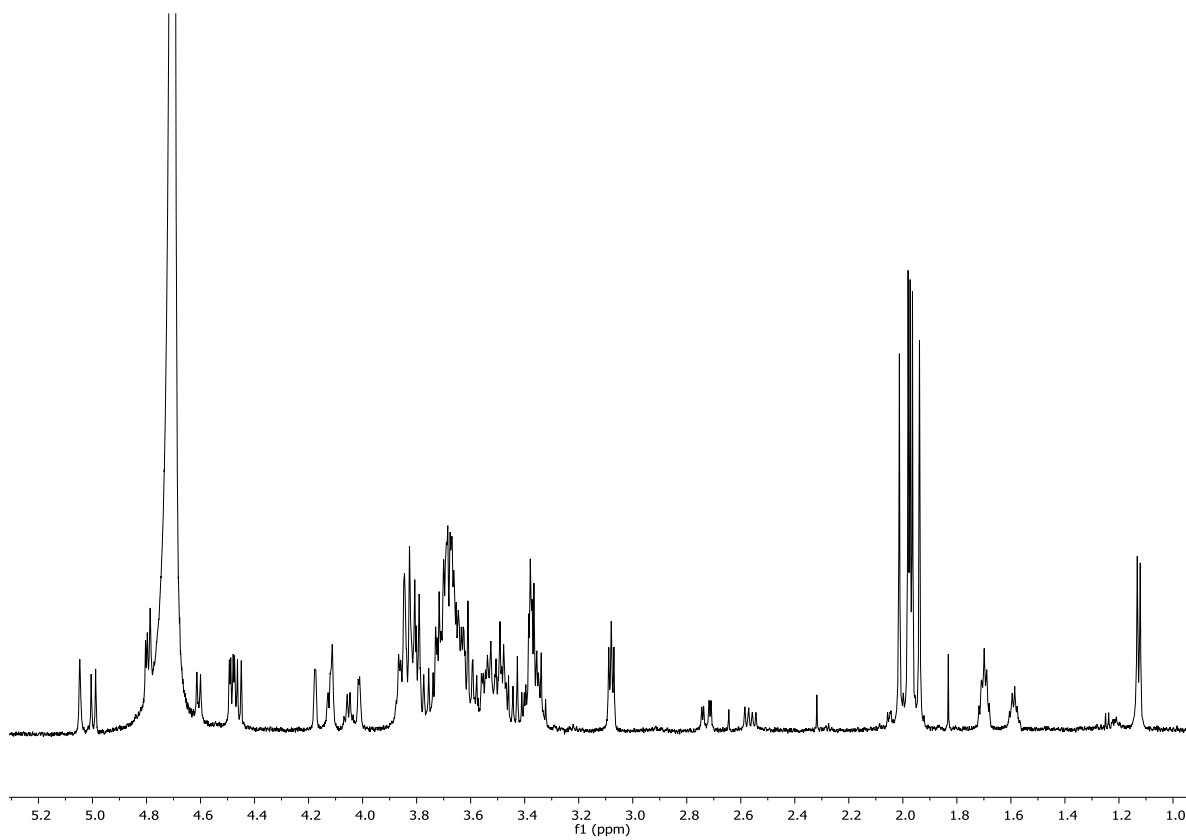

8

$^1\text{H}$  NMR ( $\text{D}_2\text{O}$ , 600M Hz)

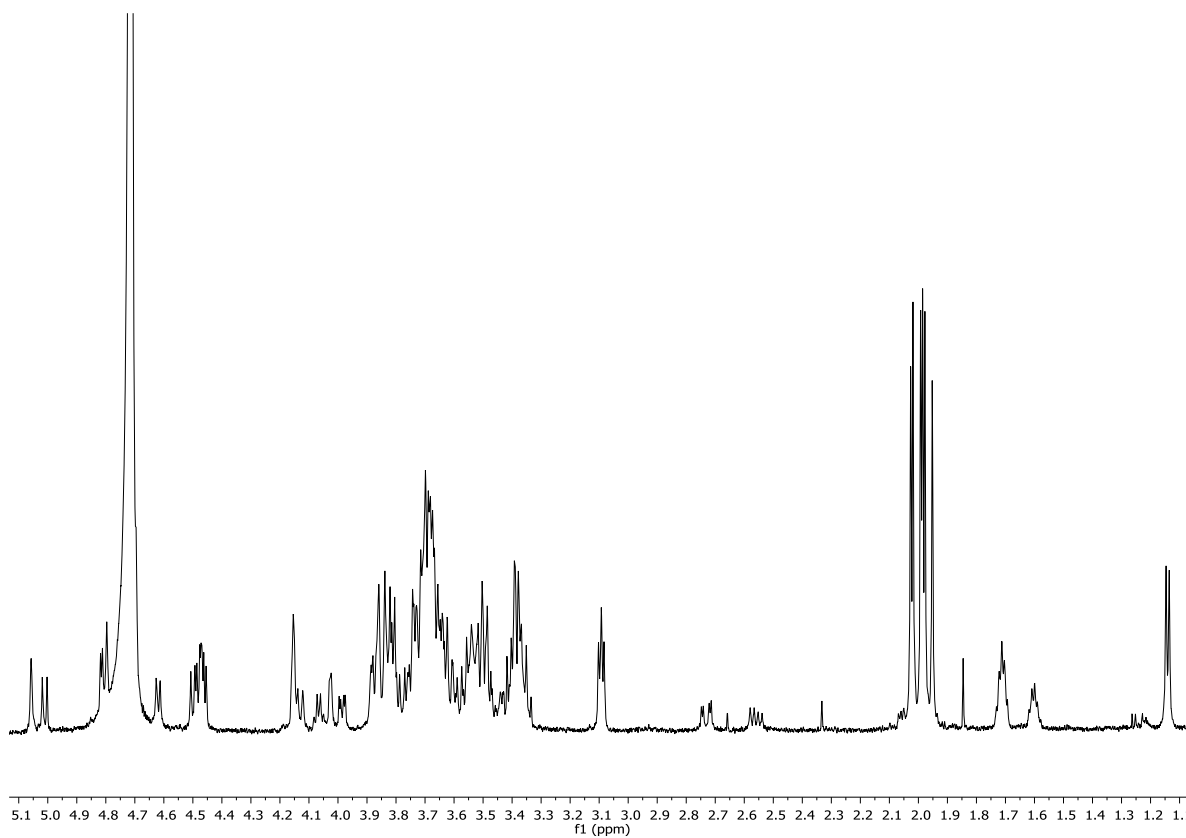

9

$^1\text{H}$  NMR ( $\text{D}_2\text{O}$ , 600M Hz)

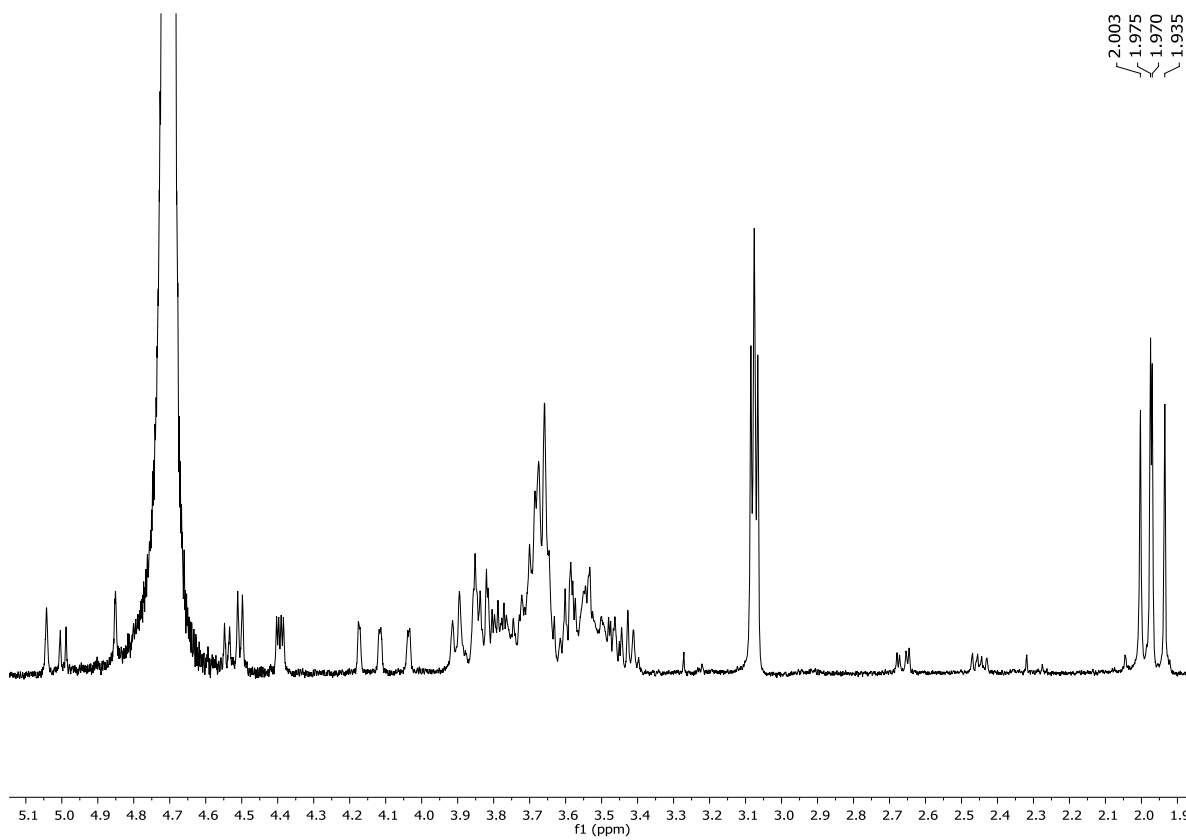

$^1\text{H}$ - $^1\text{H}$  COSY ( $\text{D}_2\text{O}$ , 600M Hz)

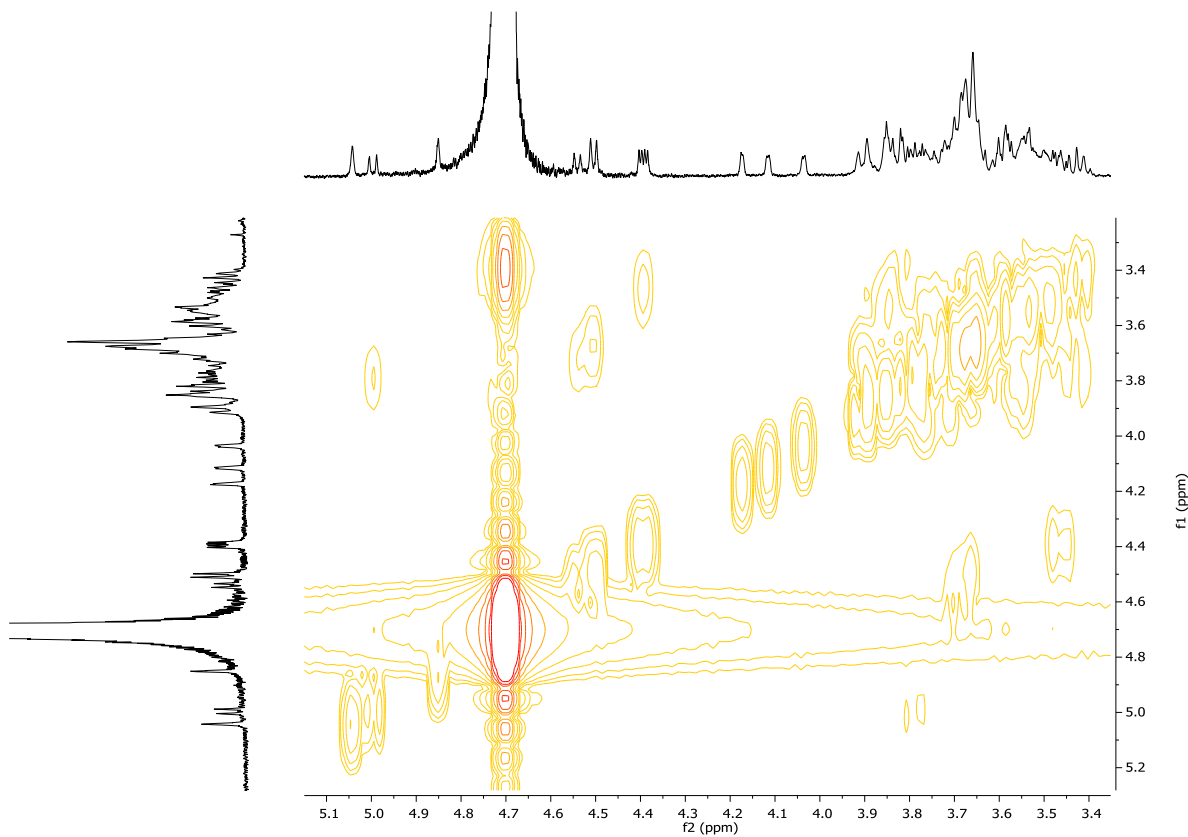

$^1\text{H}$ - $^1\text{H}$  TROSY ( $\text{D}_2\text{O}$ , 600M Hz)

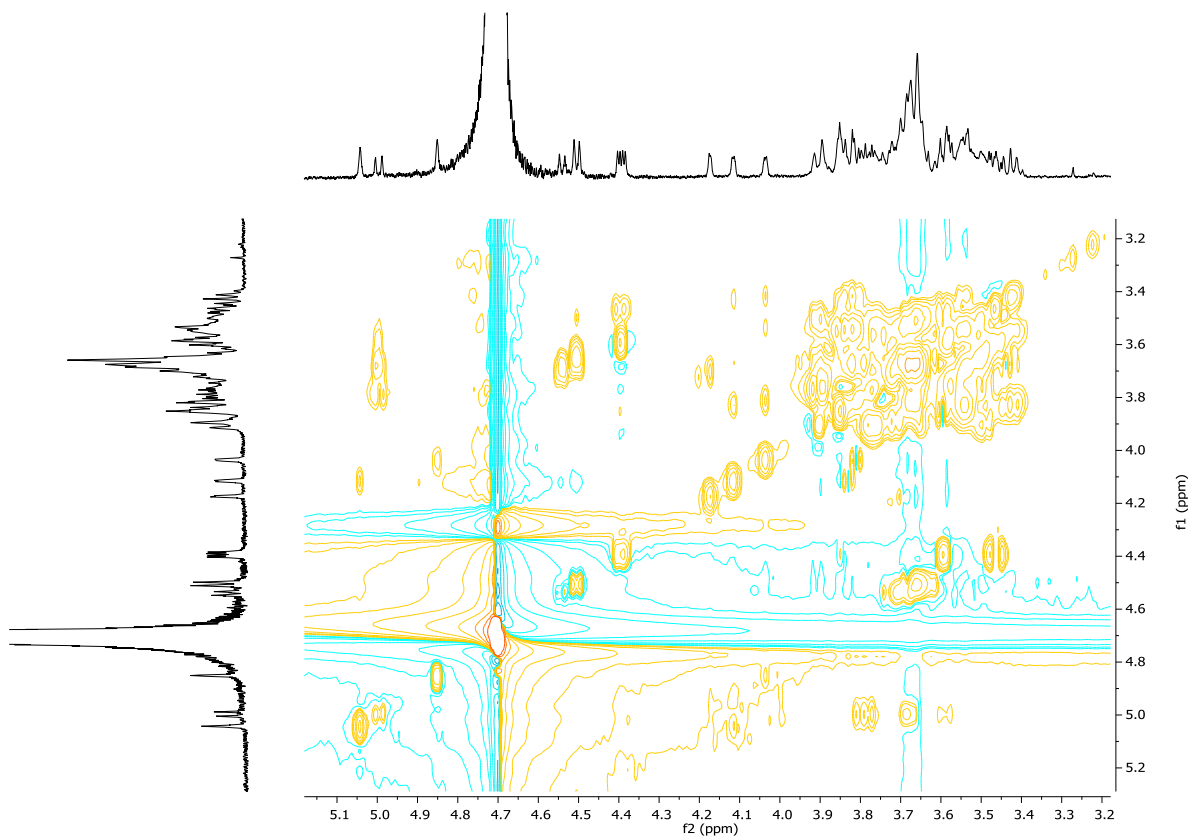

$^1\text{H}$ - $^{13}\text{C}$  HSQC ( $\text{D}_2\text{O}$ , 600M Hz)

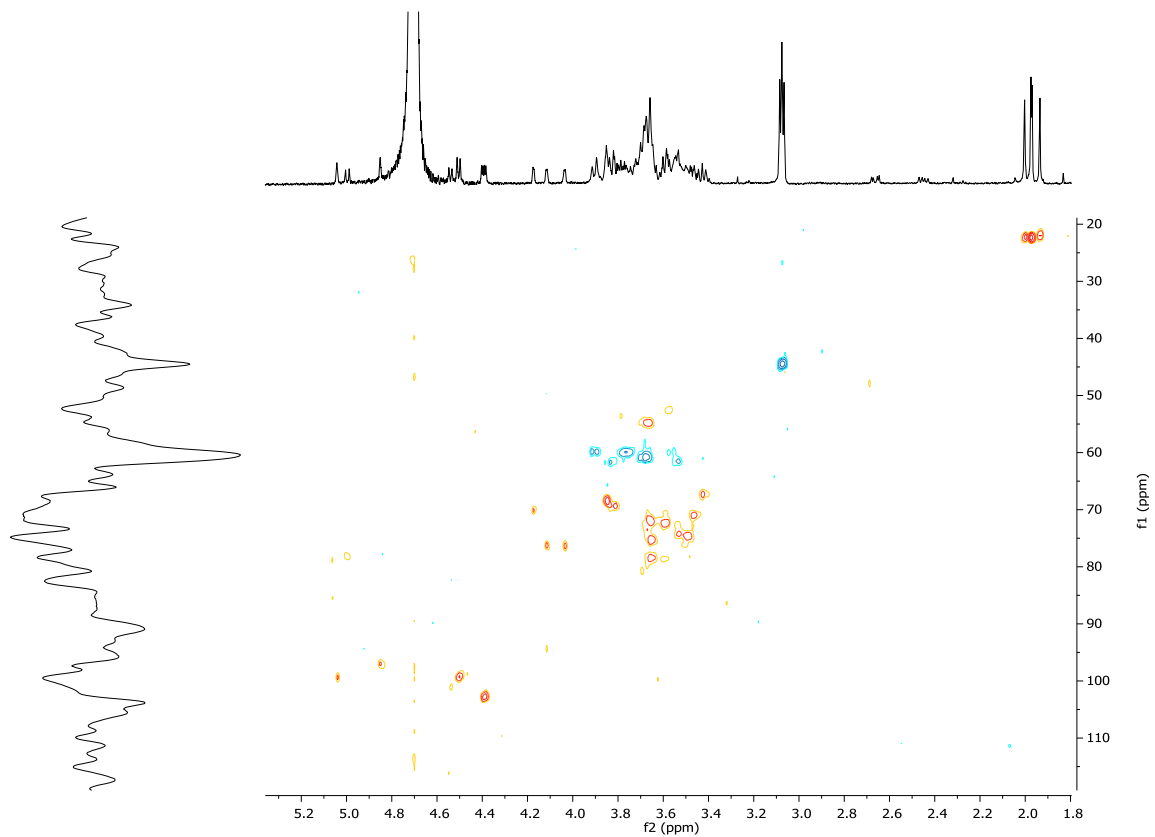

10

$^1\text{H}$  NMR ( $\text{D}_2\text{O}$ , 600M Hz)

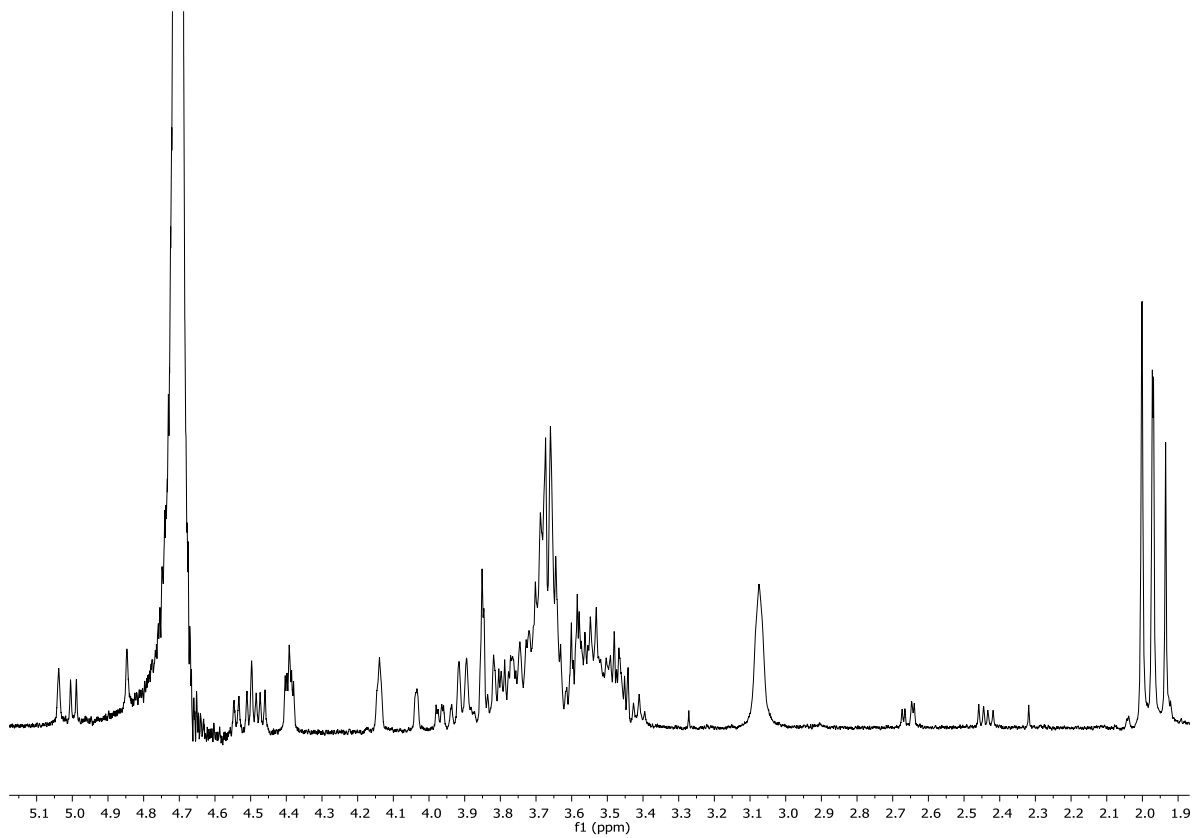

$^1\text{H}$ - $^1\text{H}$  COSY ( $\text{D}_2\text{O}$ , 600M Hz)

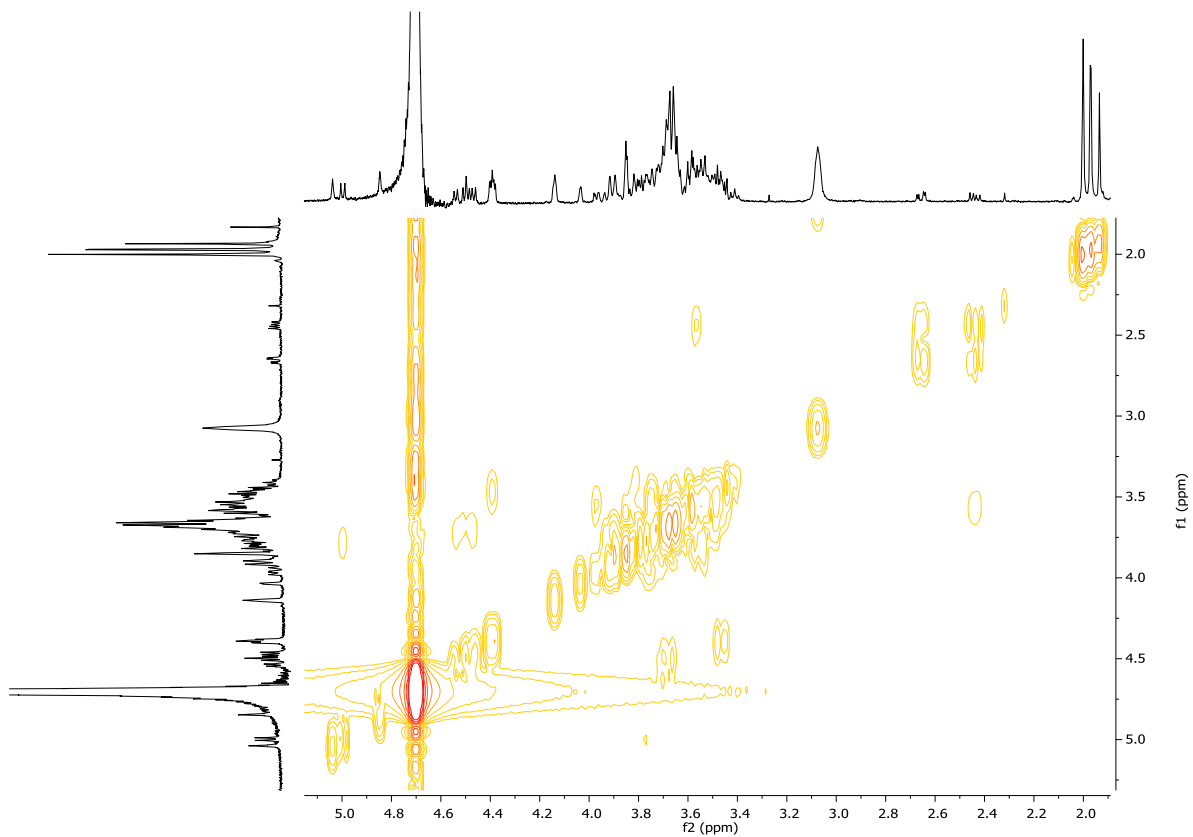

$^1\text{H}$ - $^1\text{H}$  TROSY ( $\text{D}_2\text{O}$ , 600M Hz)

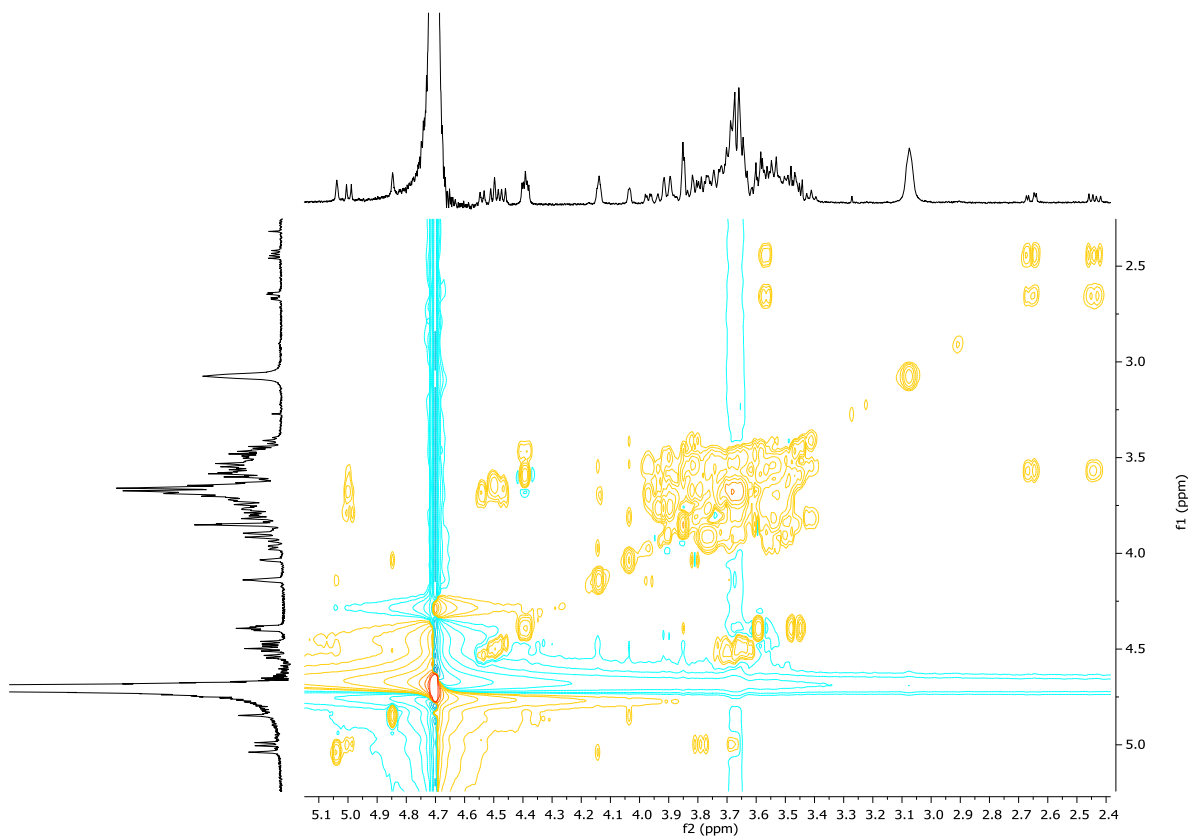

$^1\text{H}$ - $^{13}\text{C}$  HSQC ( $\text{D}_2\text{O}$ , 600M Hz)

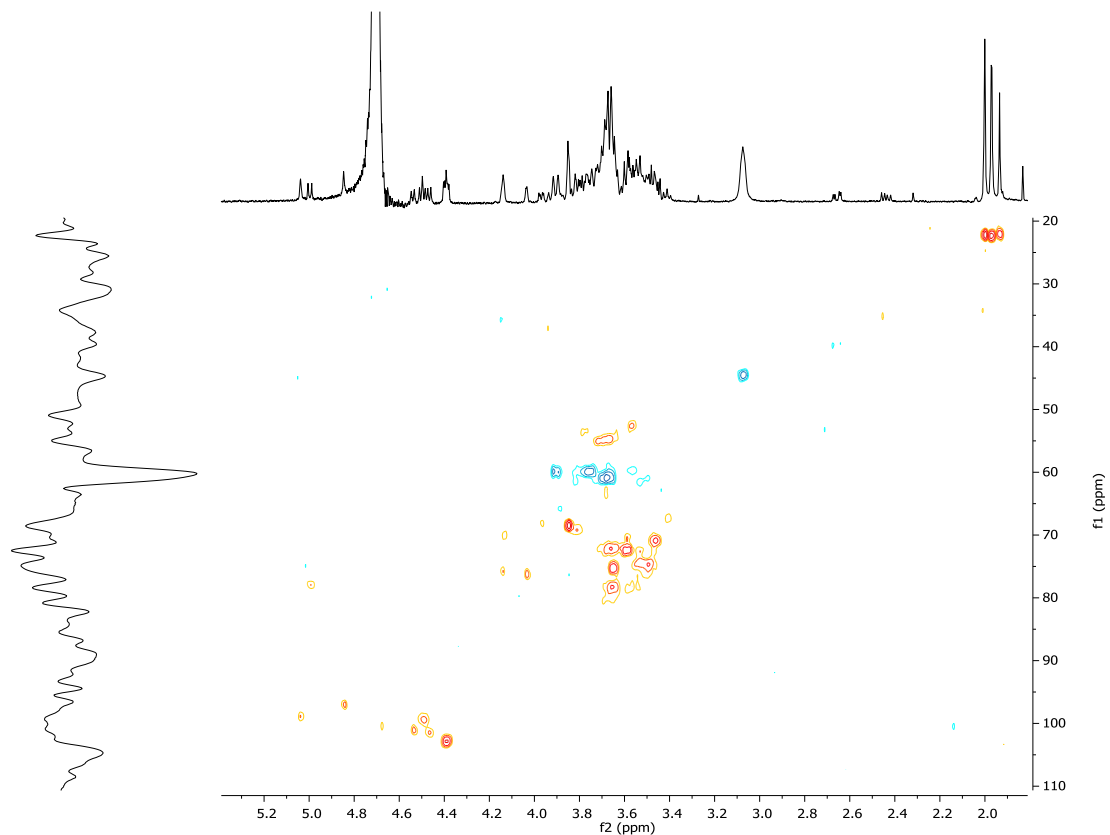

11

$^1\text{H}$  NMR ( $\text{D}_2\text{O}$ , 600M Hz)

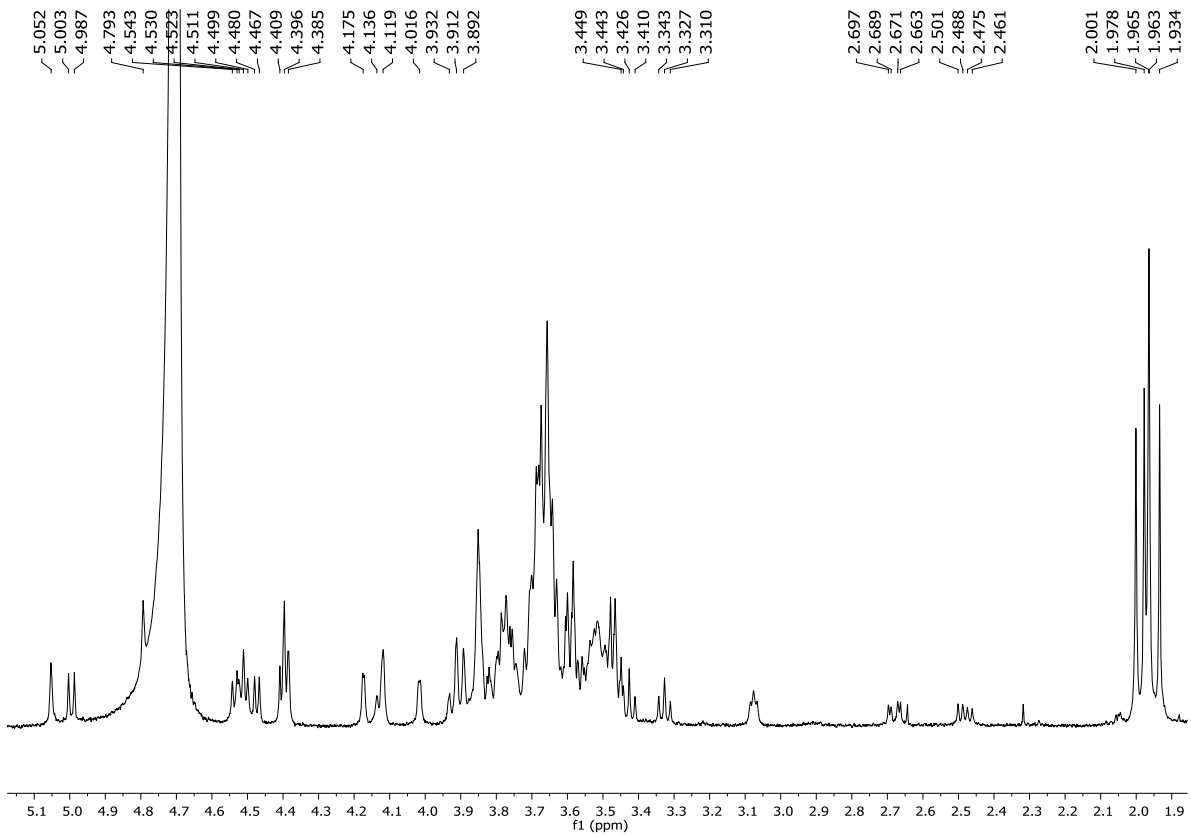

12

$^1\text{H}$  NMR ( $\text{D}_2\text{O}$ , 600M Hz)

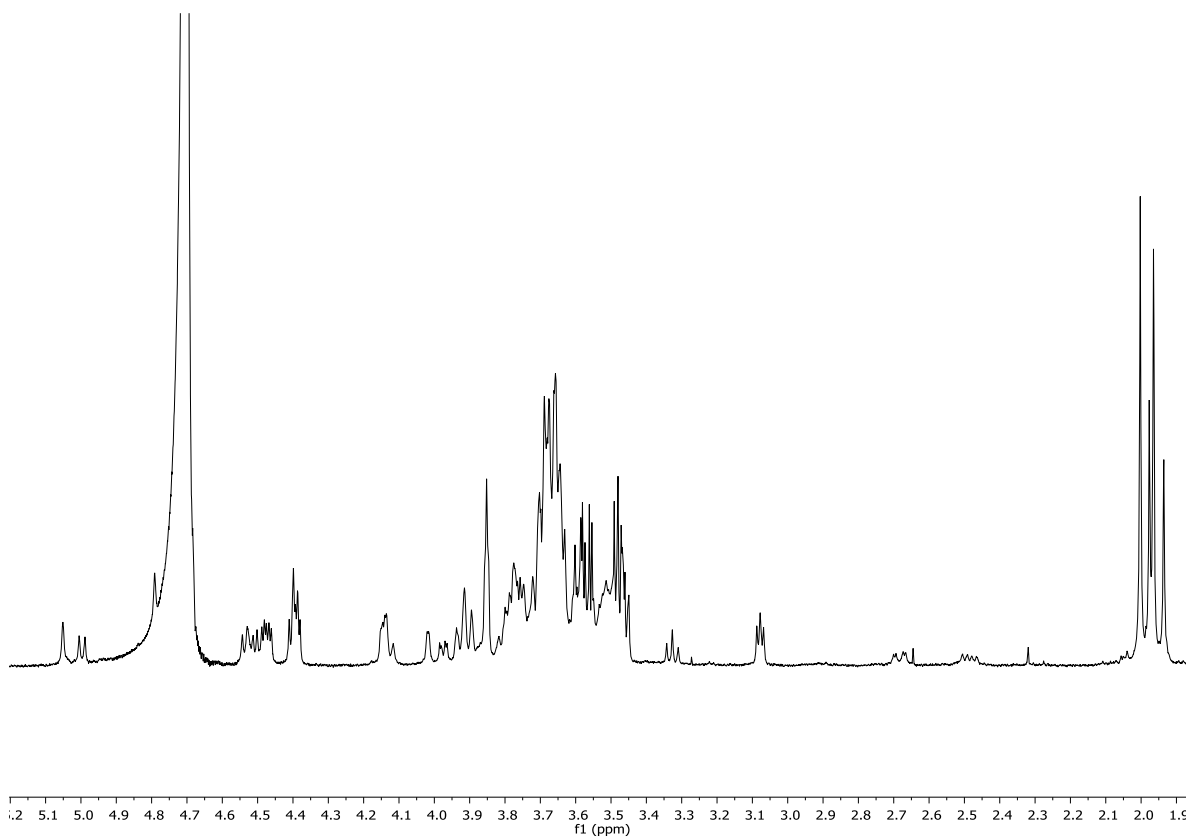

13

$^1\text{H}$  NMR ( $\text{D}_2\text{O}$ , 600M Hz)

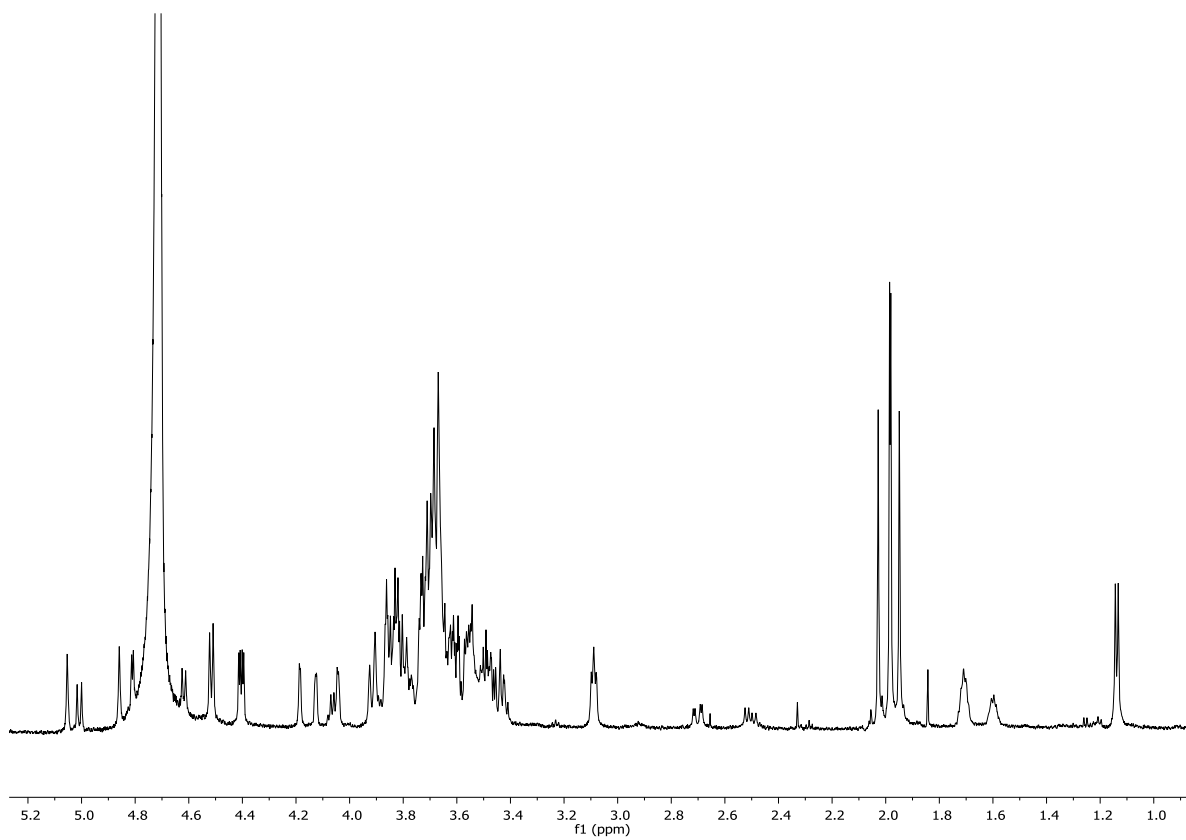



14

$^1\text{H}$  NMR ( $\text{D}_2\text{O}$ , 600M Hz)

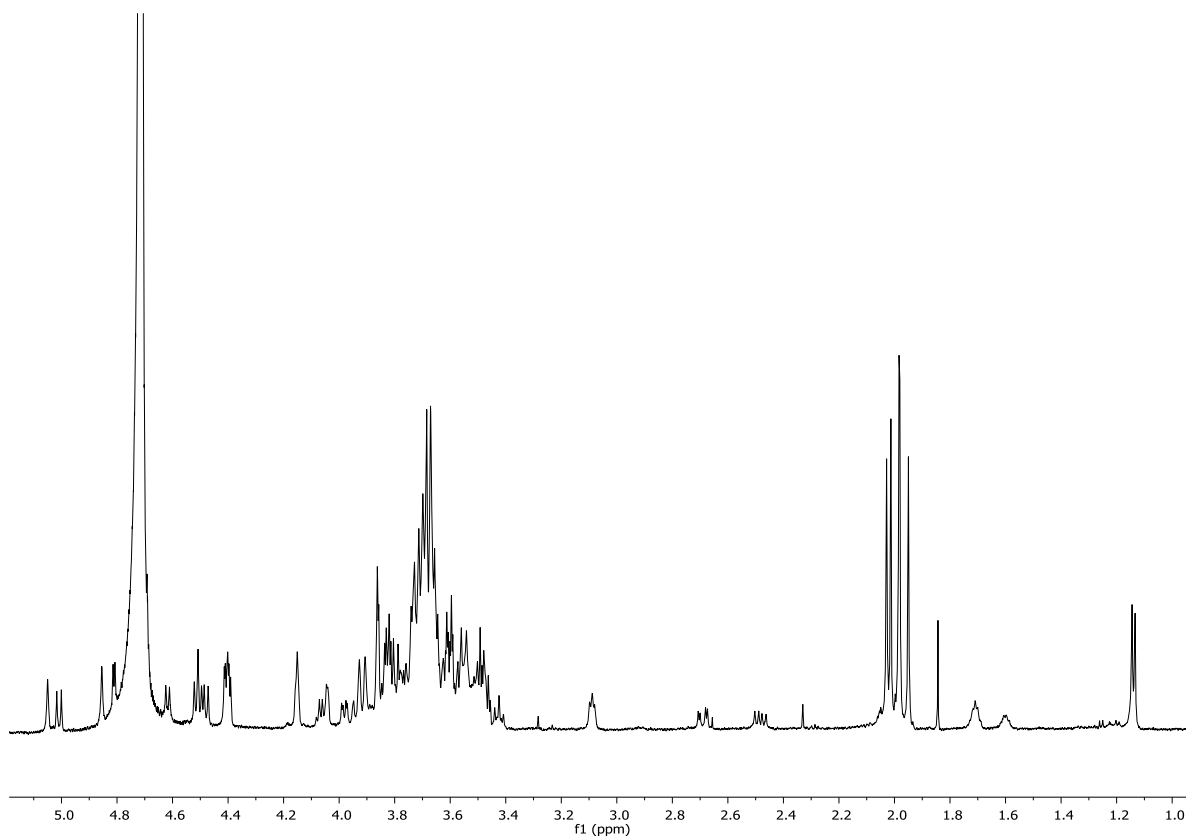

15

$^1\text{H}$  NMR ( $\text{D}_2\text{O}$ , 600M Hz)

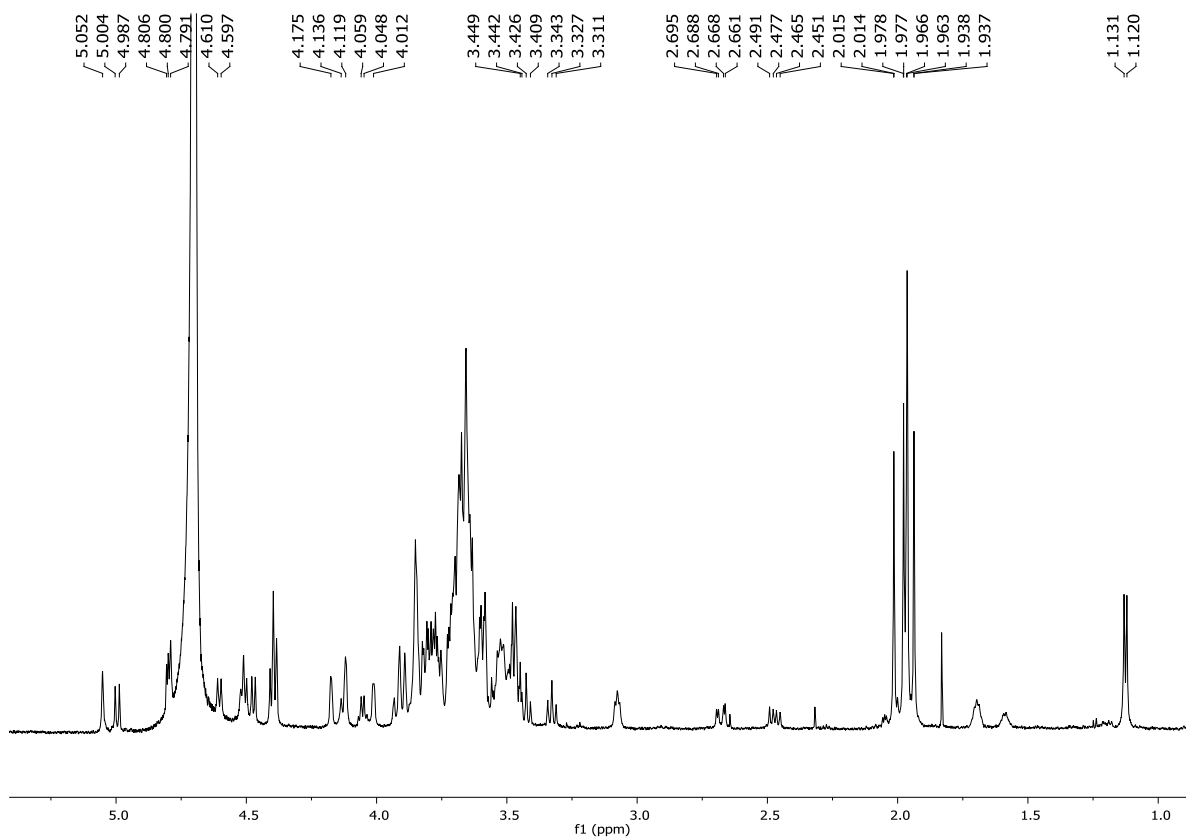

16

$^1\text{H}$  NMR ( $\text{D}_2\text{O}$ , 600M Hz)

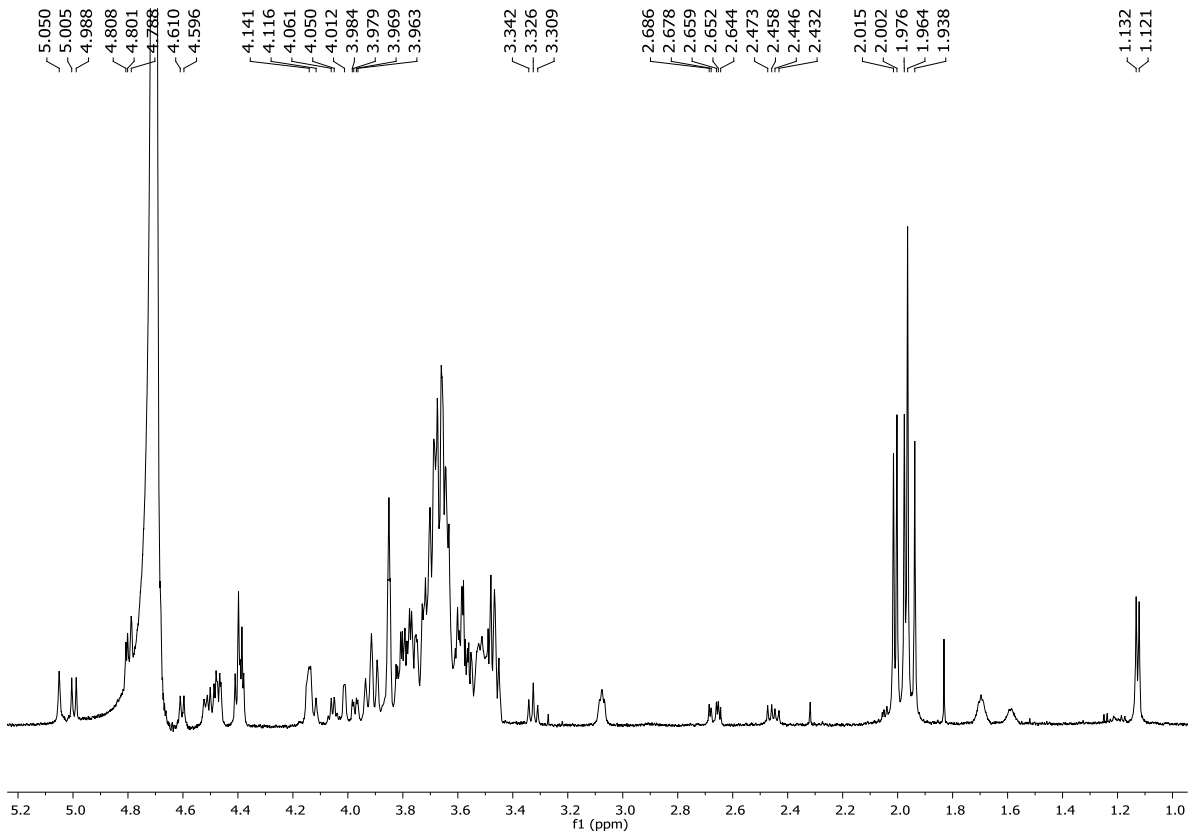

17

$^1\text{H}$  NMR ( $\text{D}_2\text{O}$ , 600M Hz)

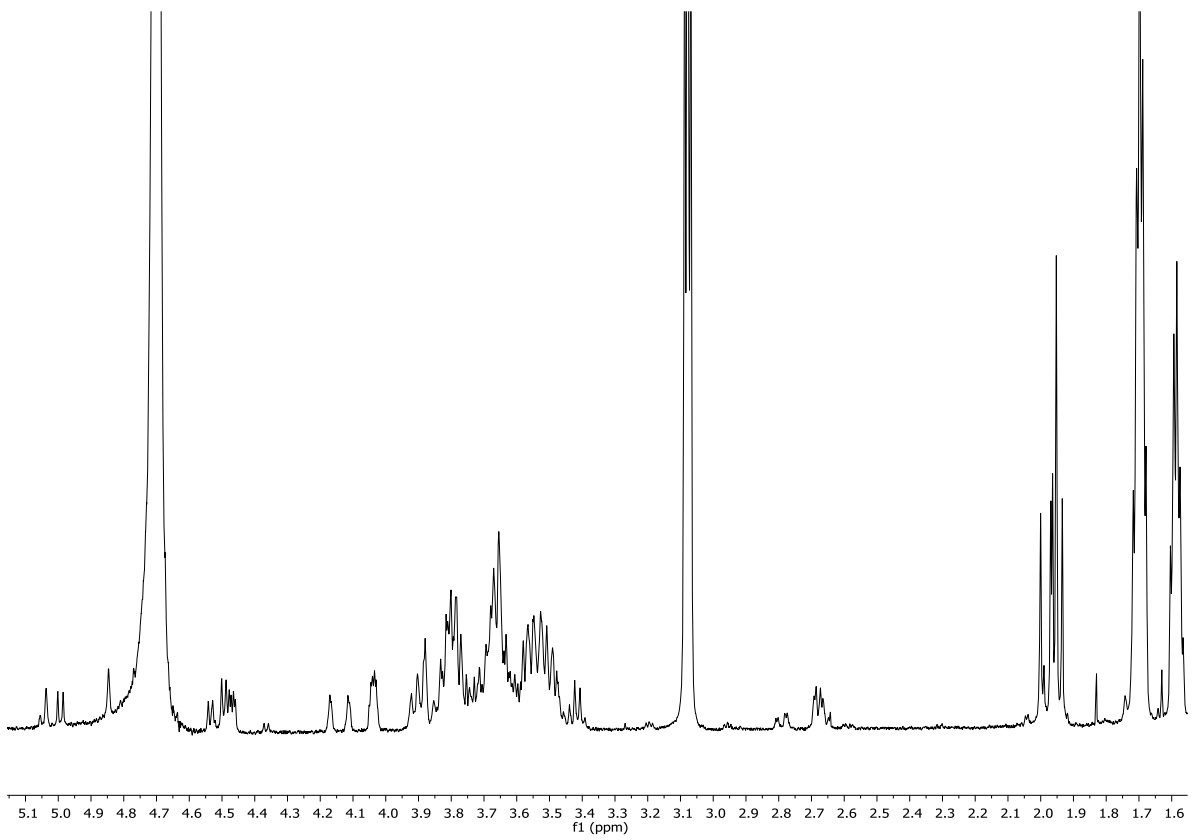

$^1\text{H}$ - $^1\text{H}$  COSY ( $\text{D}_2\text{O}$ , 600M Hz)

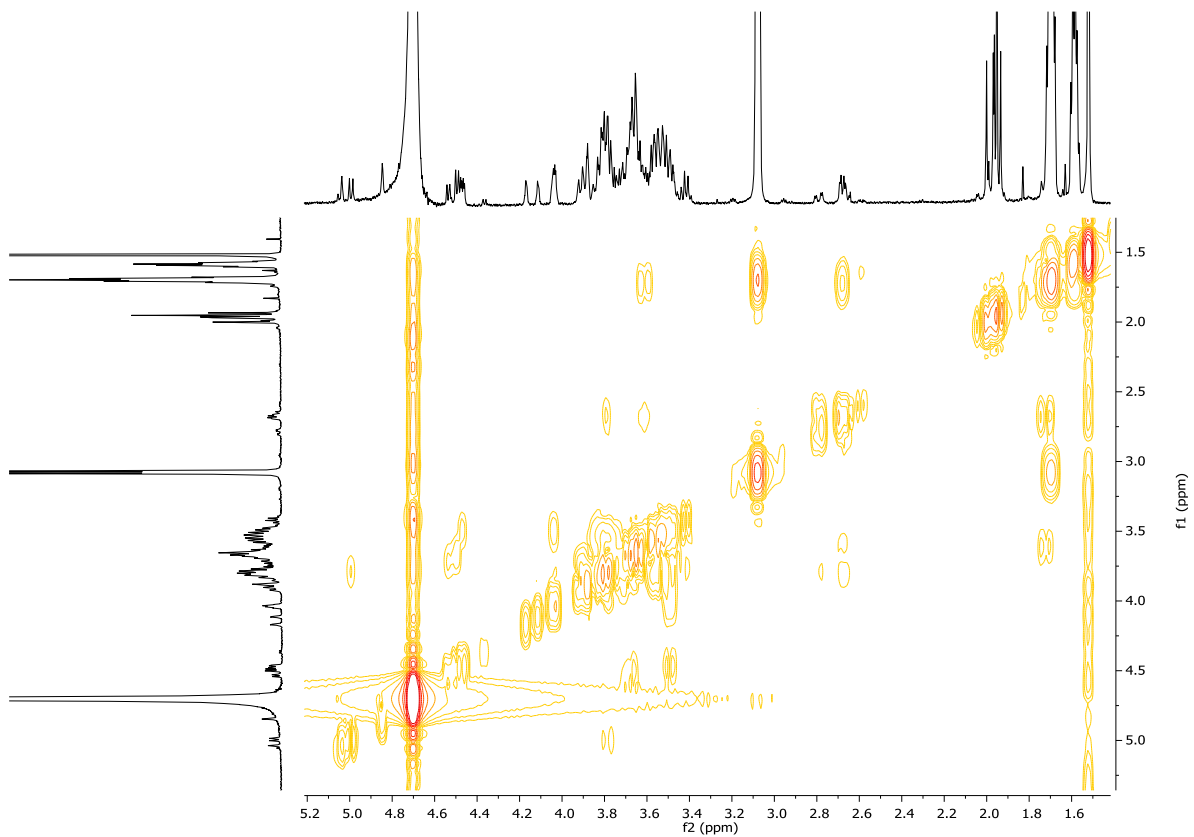

$^1\text{H}$ - $^1\text{H}$  TROSY ( $\text{D}_2\text{O}$ , 600M Hz)

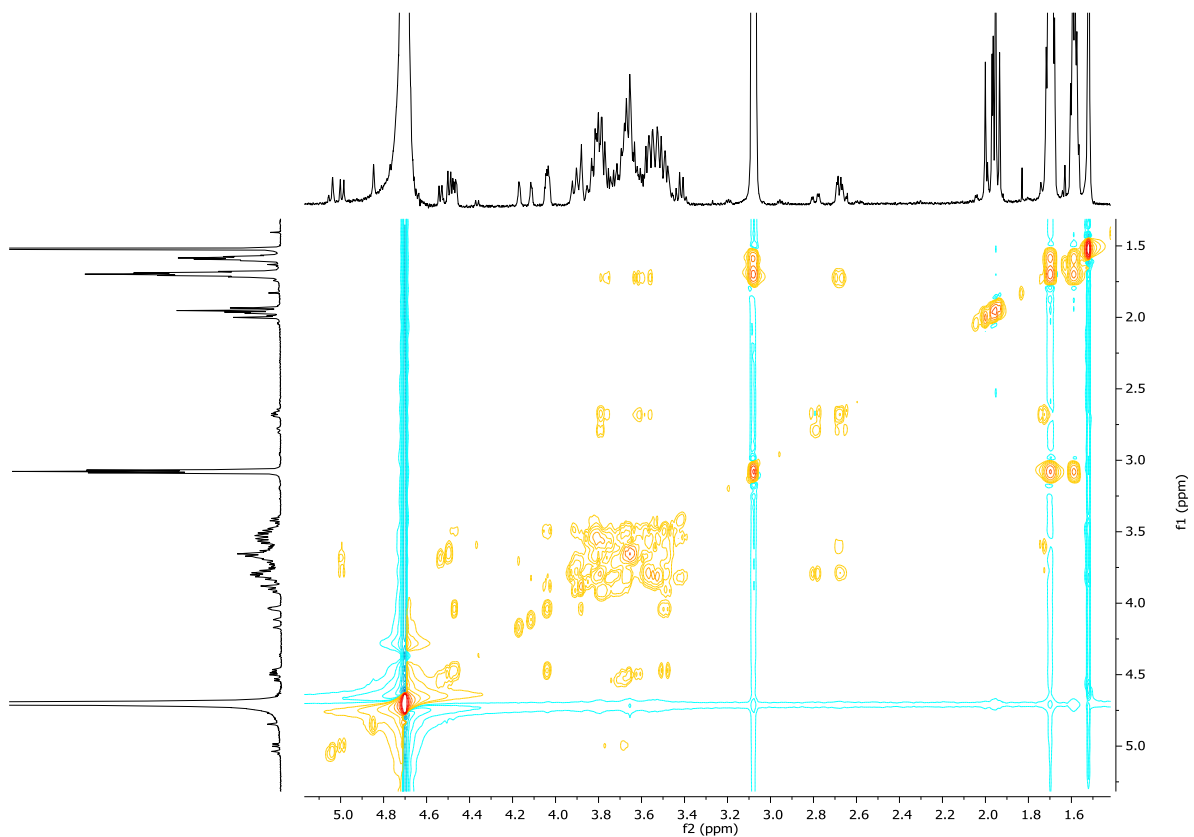

$^1\text{H}$ - $^{13}\text{C}$  HSQC ( $\text{D}_2\text{O}$ , 600M Hz)

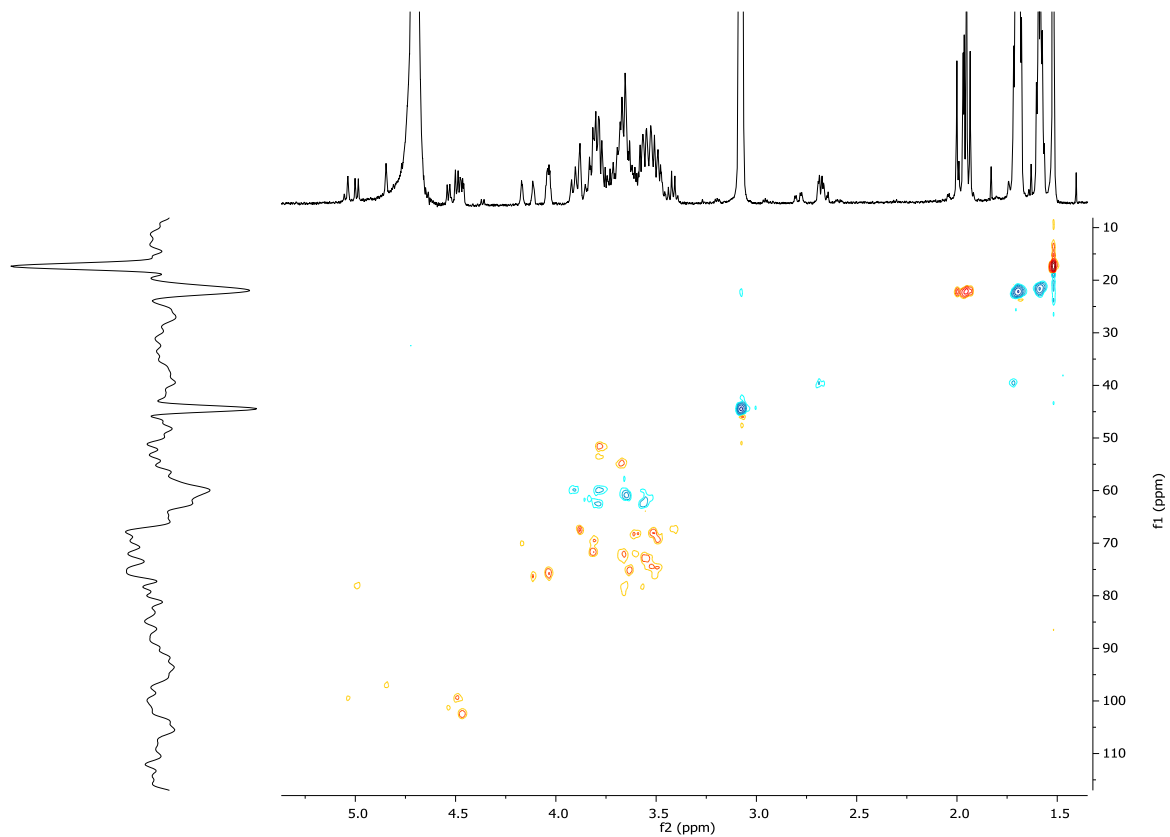

18

$^1\text{H}$  NMR ( $\text{D}_2\text{O}$ , 600M Hz)

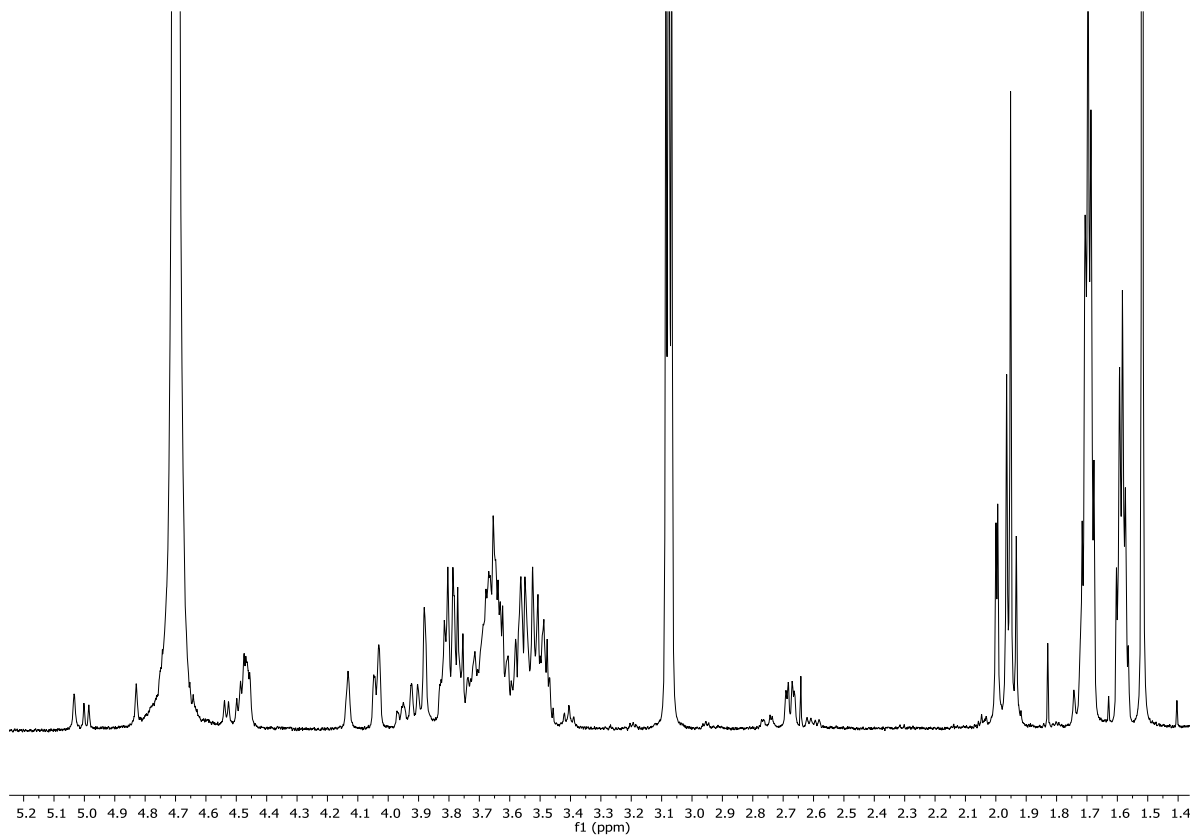

$^1\text{H}$ - $^1\text{H}$  COSY ( $\text{D}_2\text{O}$ , 600M Hz)

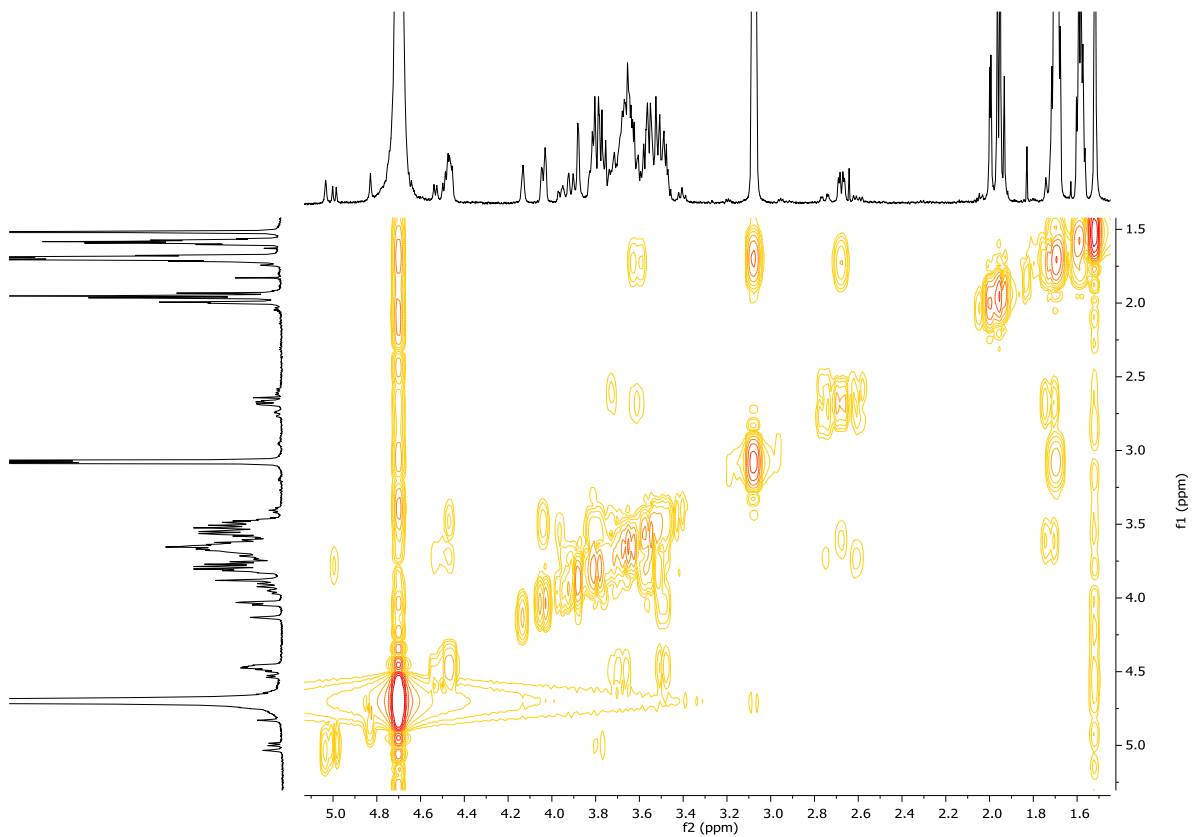

$^1\text{H}$ - $^1\text{H}$  TOSY ( $\text{D}_2\text{O}$ , 600M Hz)

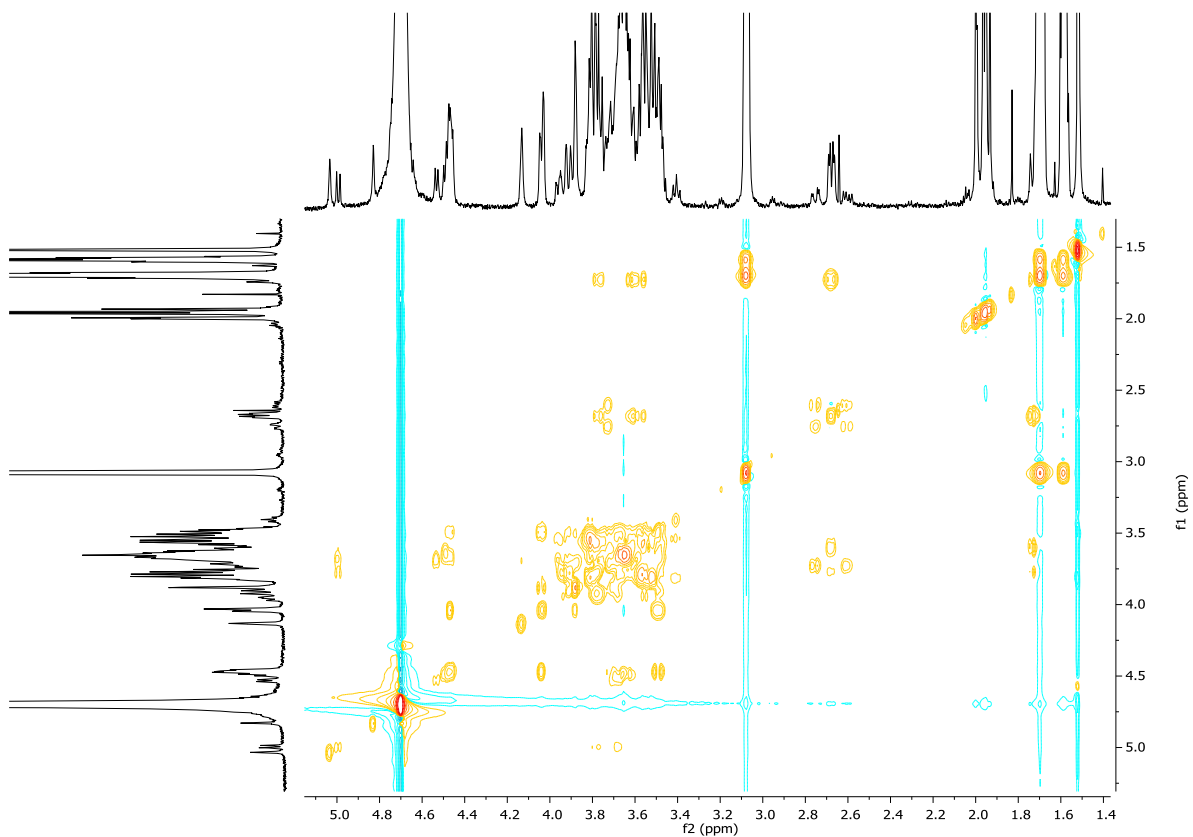

$^1\text{H}$ - $^{13}\text{C}$  HSQC ( $\text{D}_2\text{O}$ , 600M Hz)

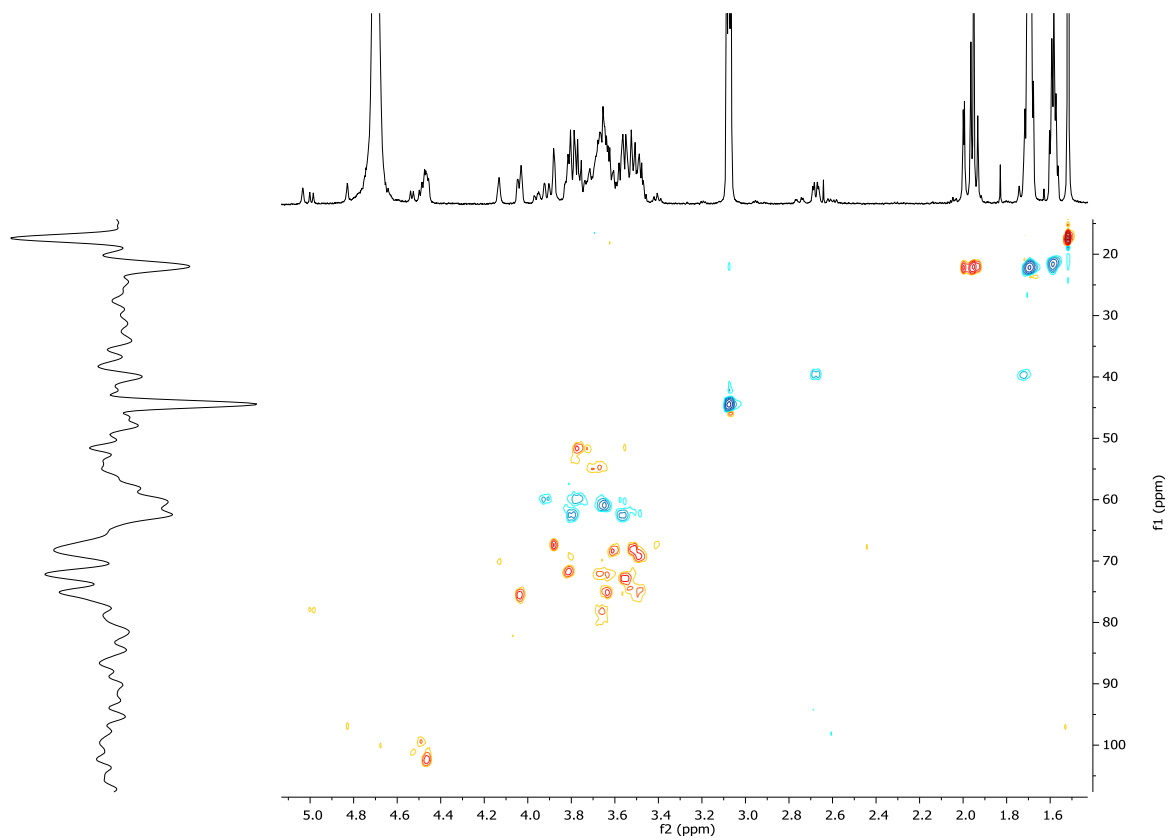

19

$^1\text{H}$  NMR ( $\text{D}_2\text{O}$ , 600M Hz)

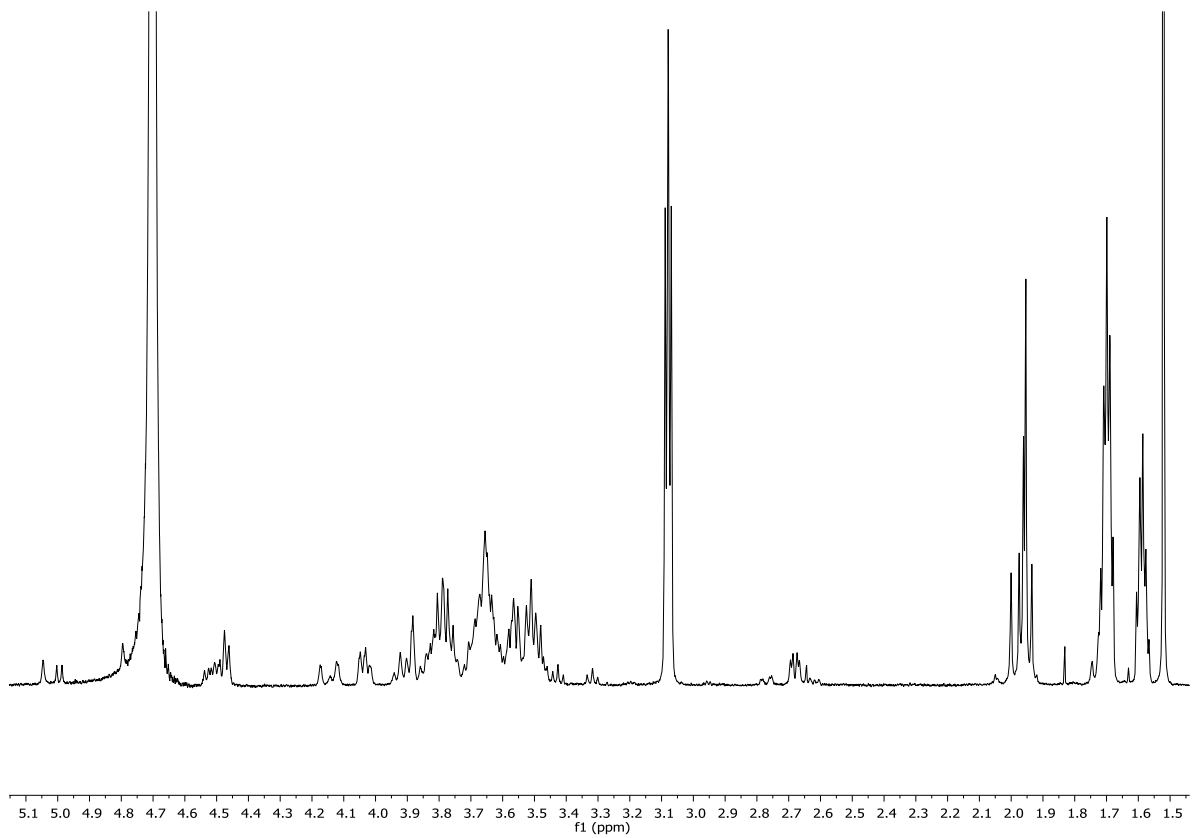

$^1\text{H}$ - $^1\text{H}$  COSY ( $\text{D}_2\text{O}$ , 600M Hz)

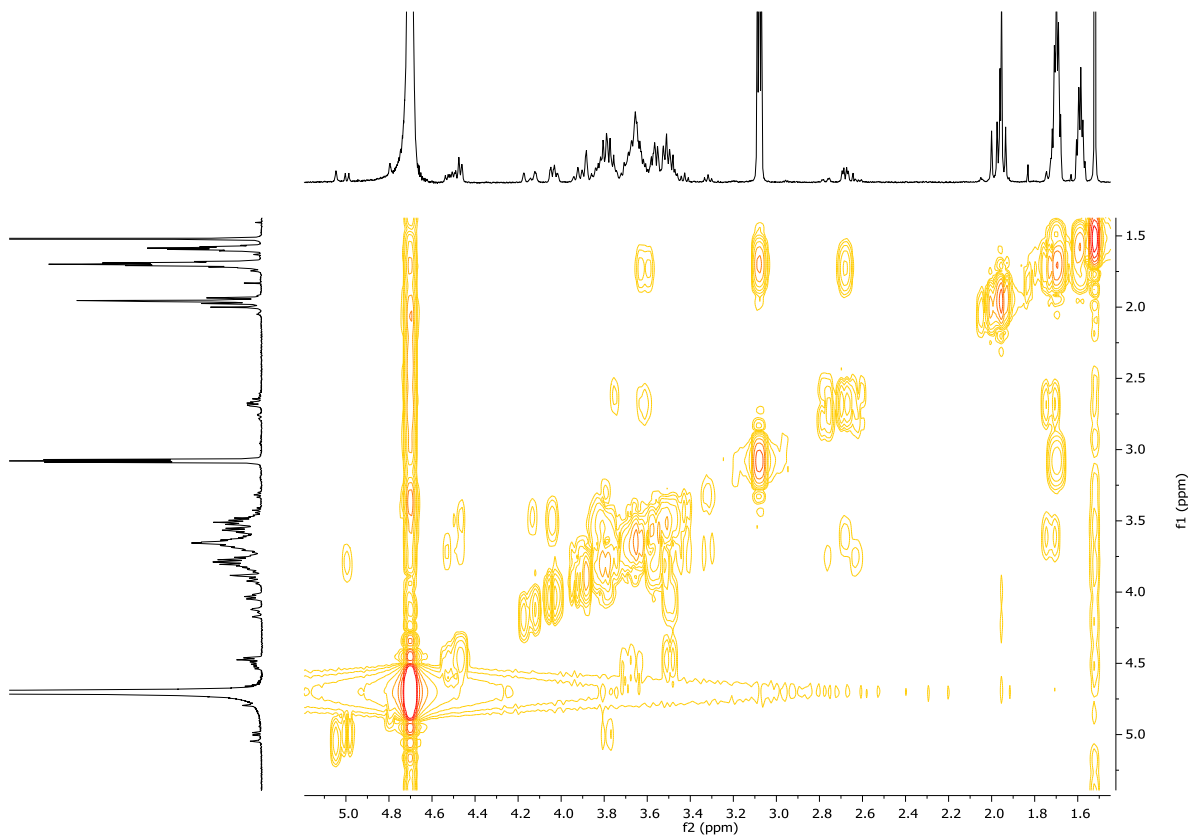

$^1\text{H}$ - $^1\text{H}$  TCOY ( $\text{D}_2\text{O}$ , 600M Hz)

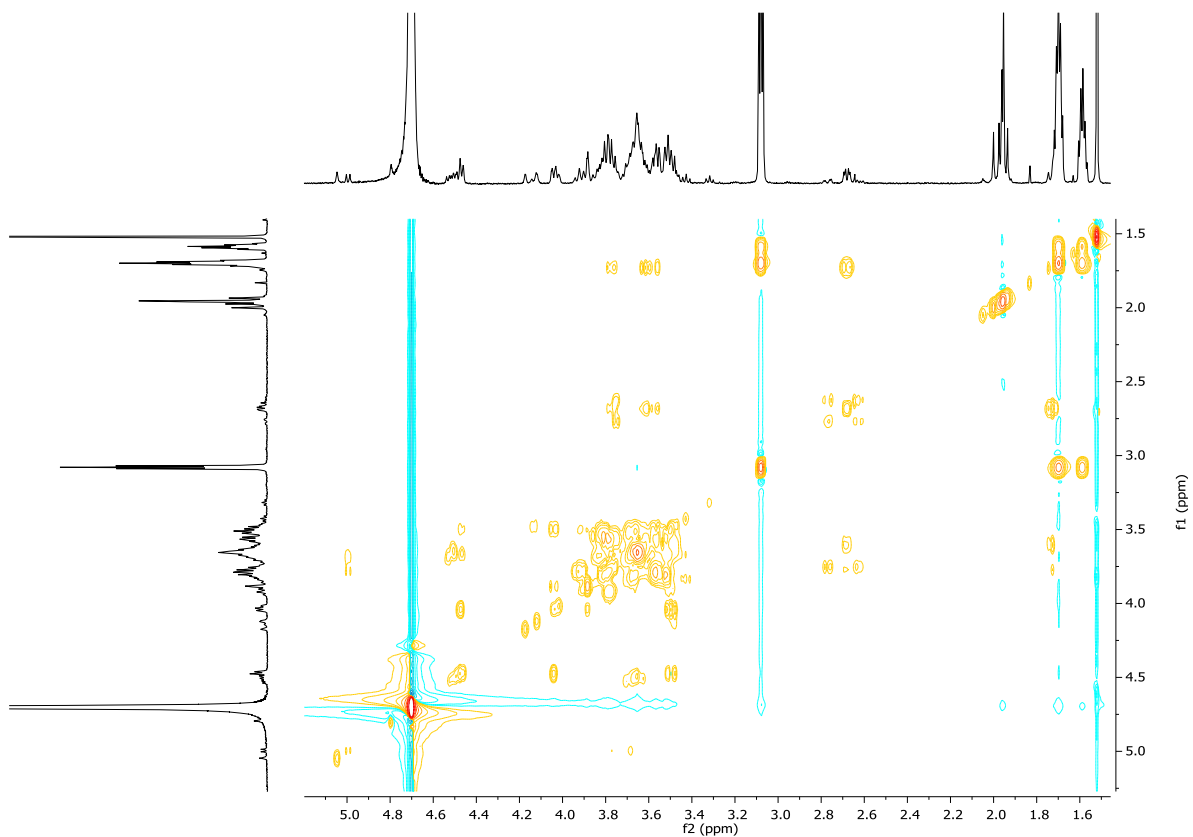

$^1\text{H}$ - $^{13}\text{C}$  HSQC ( $\text{D}_2\text{O}$ , 600M Hz)

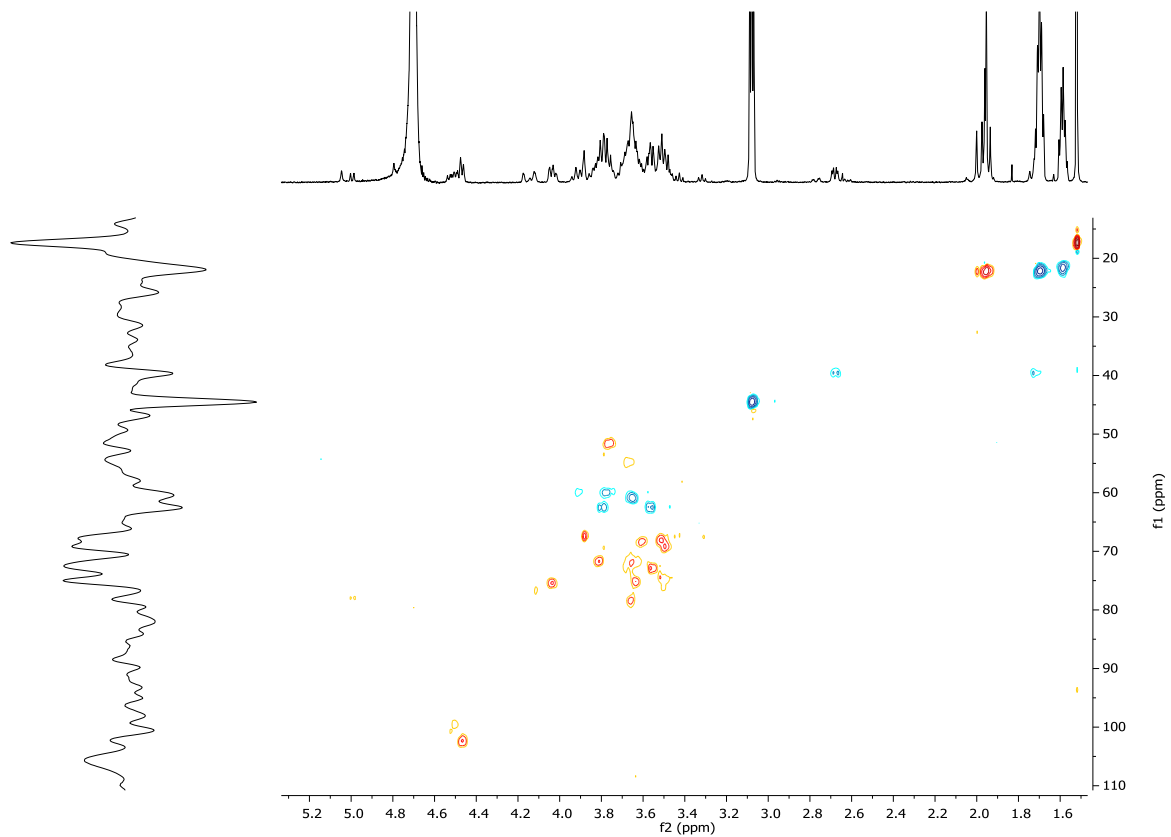

20

$^1\text{H}$  NMR ( $\text{D}_2\text{O}$ , 600M Hz)

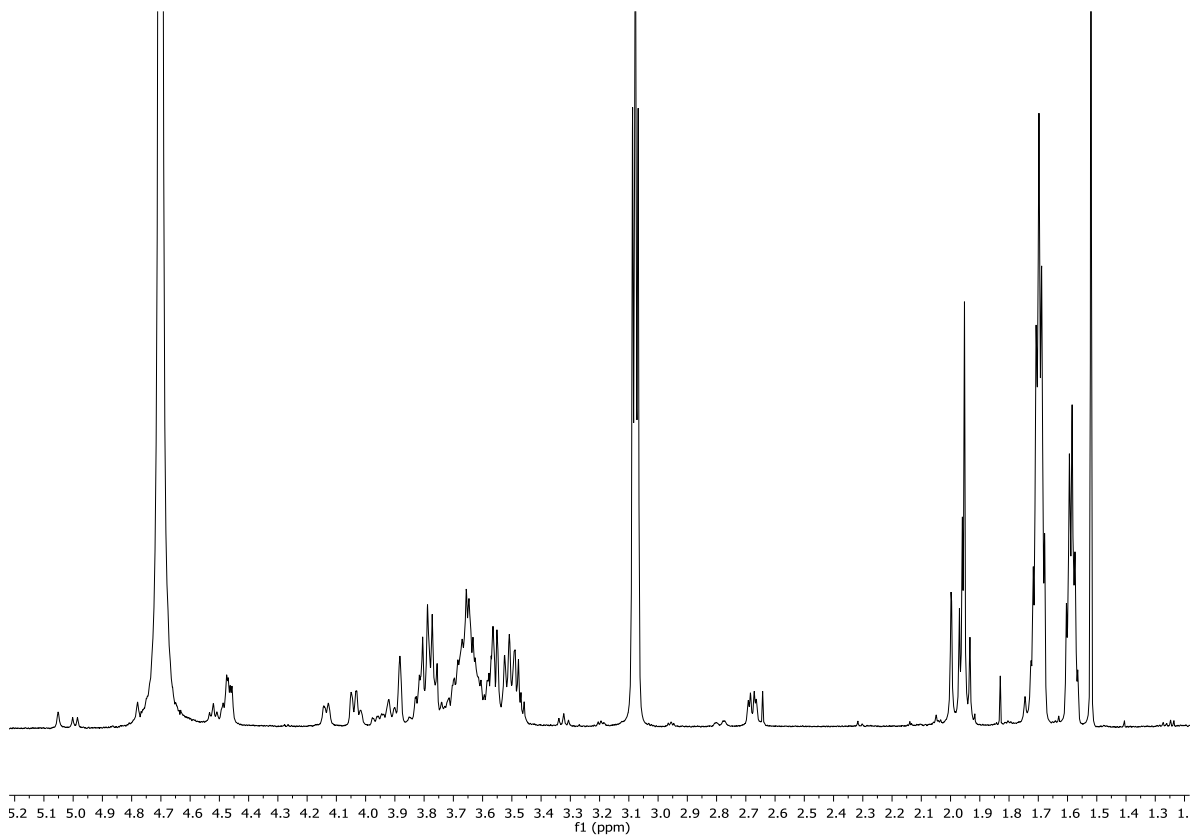



$^1\text{H}$ - $^1\text{H}$  COSY ( $\text{D}_2\text{O}$ , 600M Hz)

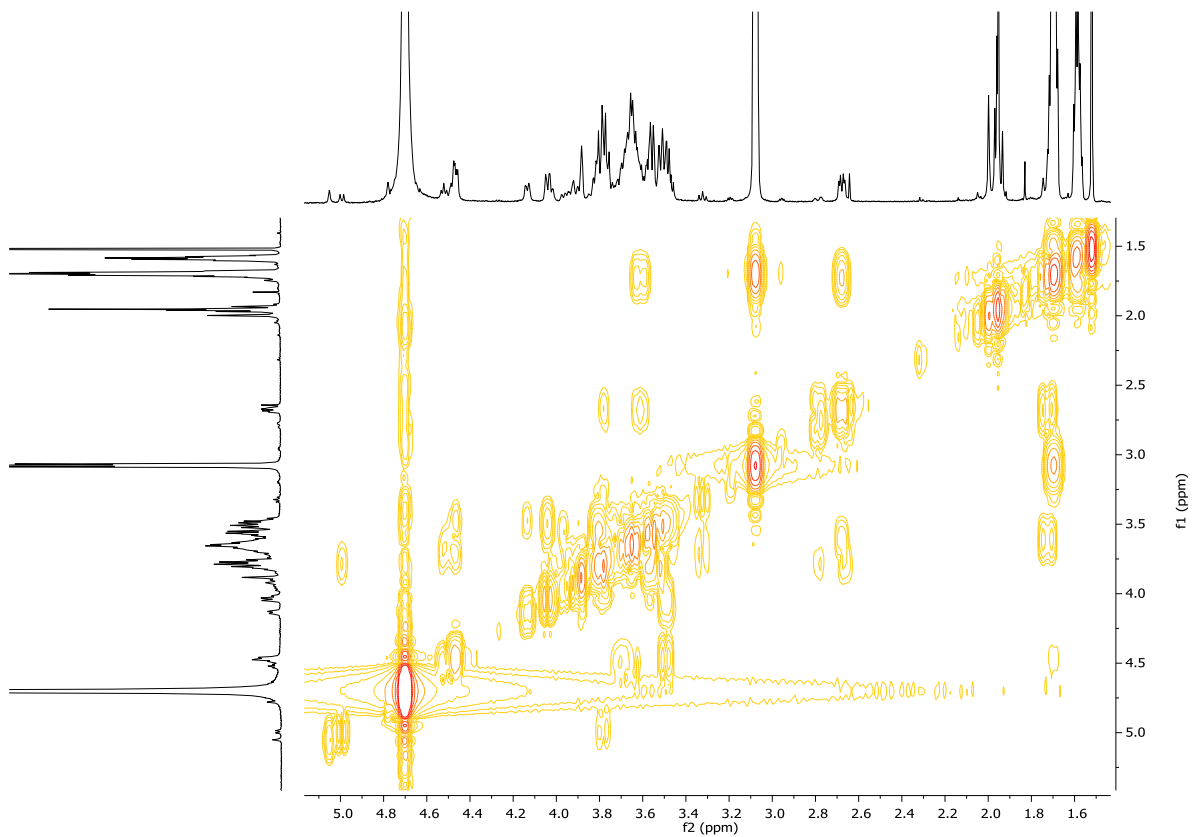

$^1\text{H}$ - $^1\text{H}$  TROSY ( $\text{D}_2\text{O}$ , 600M Hz)

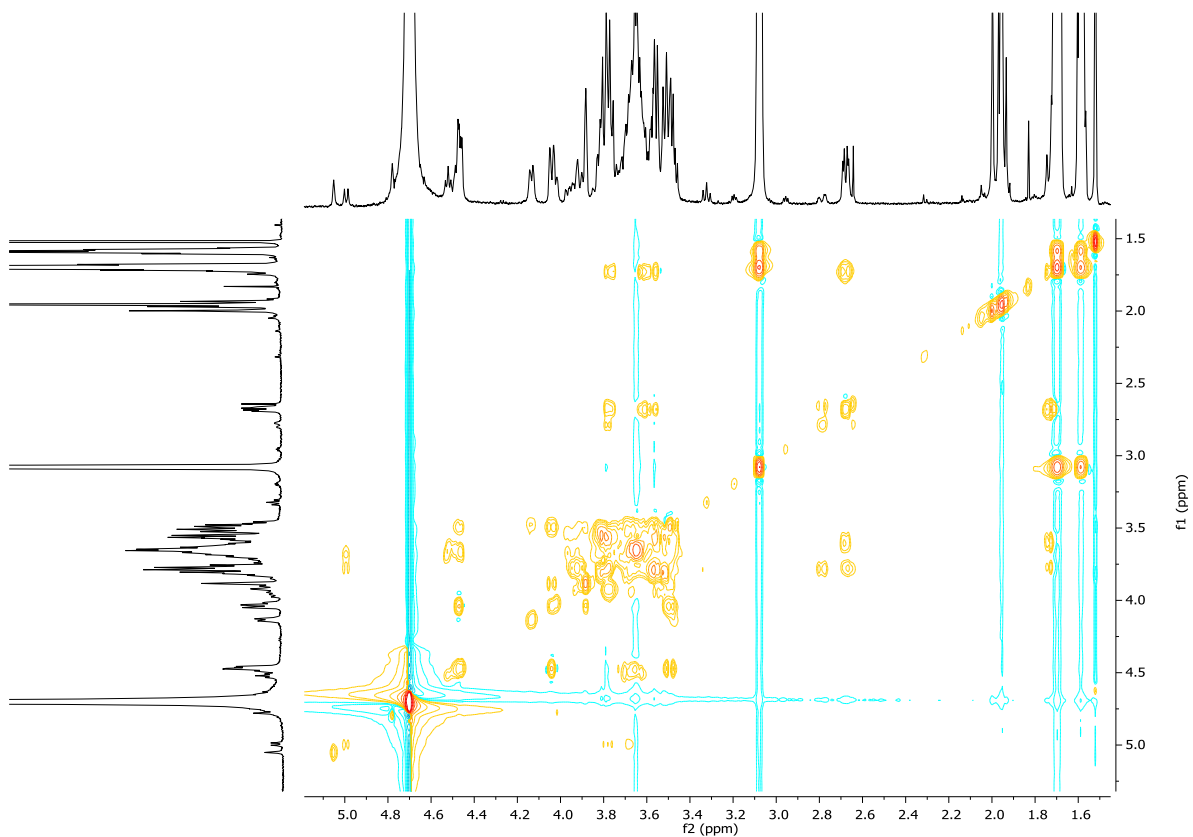

$^1\text{H}$ - $^{13}\text{C}$  HSQC ( $\text{D}_2\text{O}$ , 600M Hz)

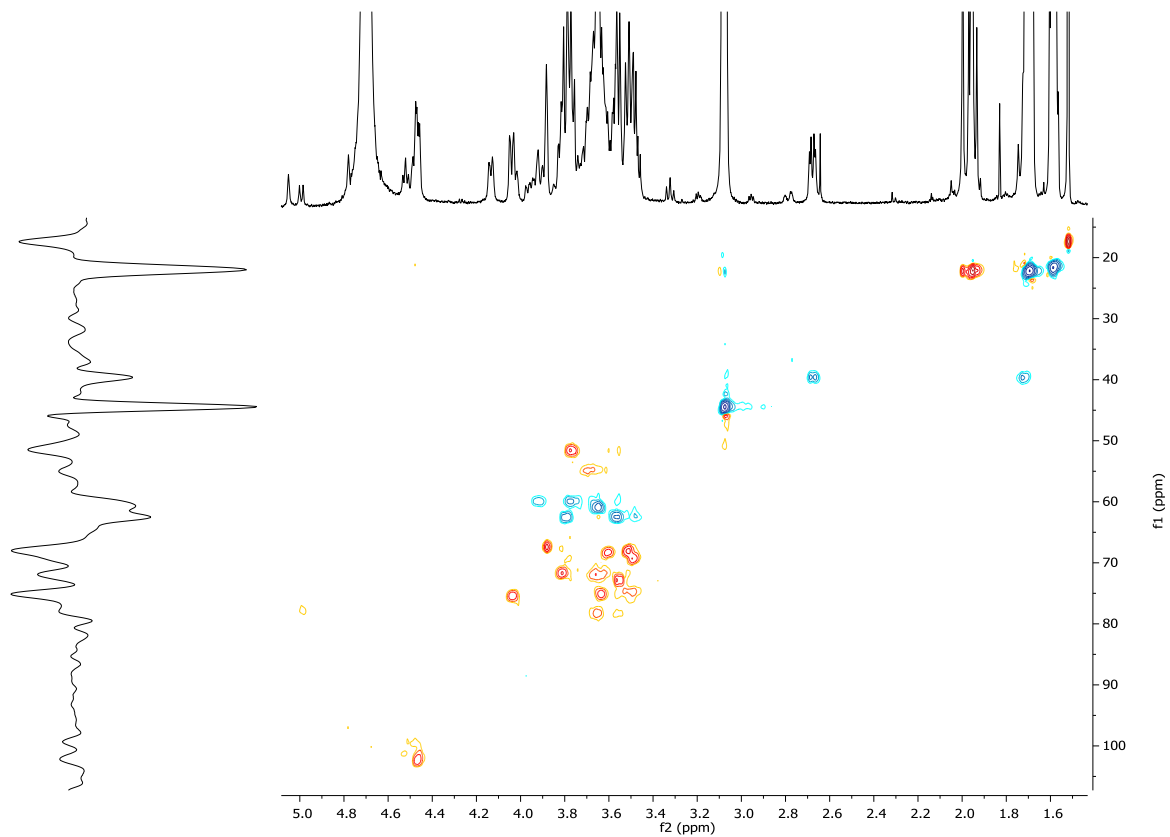

21

$^1\text{H}$  NMR ( $\text{D}_2\text{O}$ , 600M Hz)

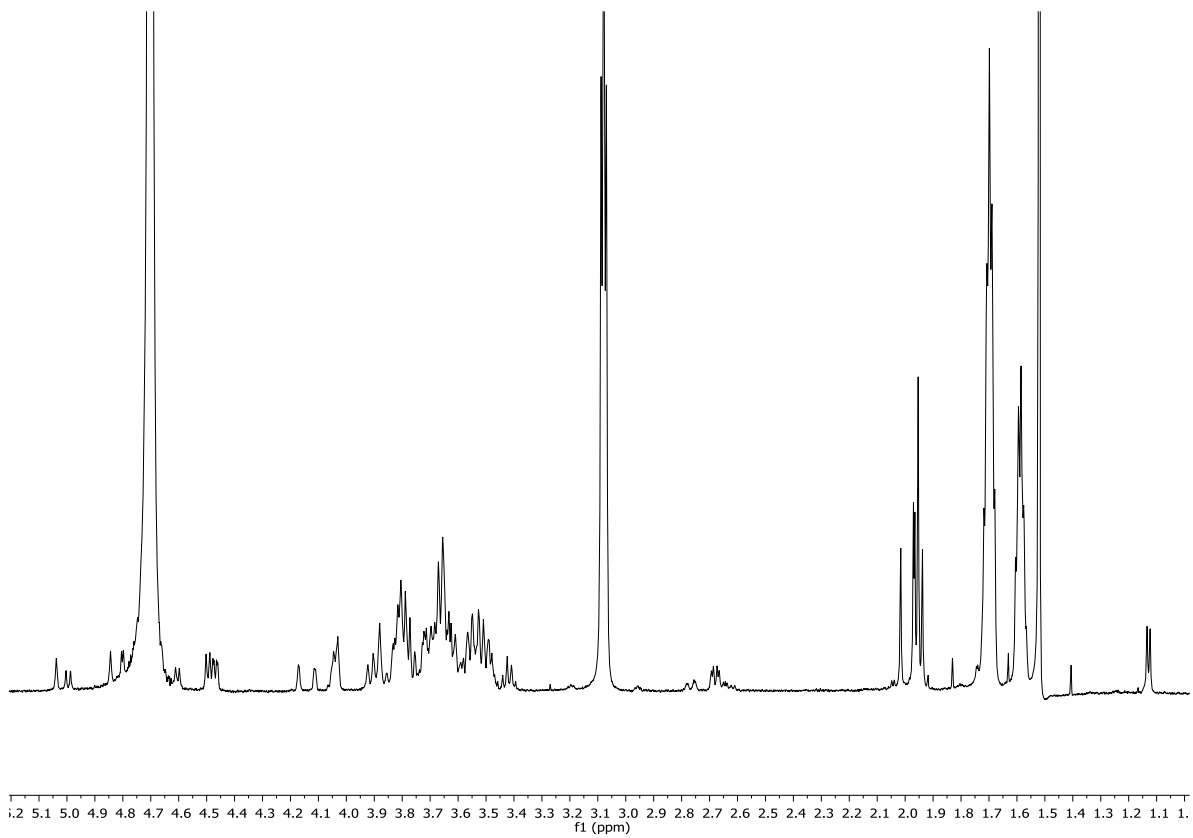

$^1\text{H}$ - $^1\text{H}$  COSY ( $\text{D}_2\text{O}$ , 600M Hz)

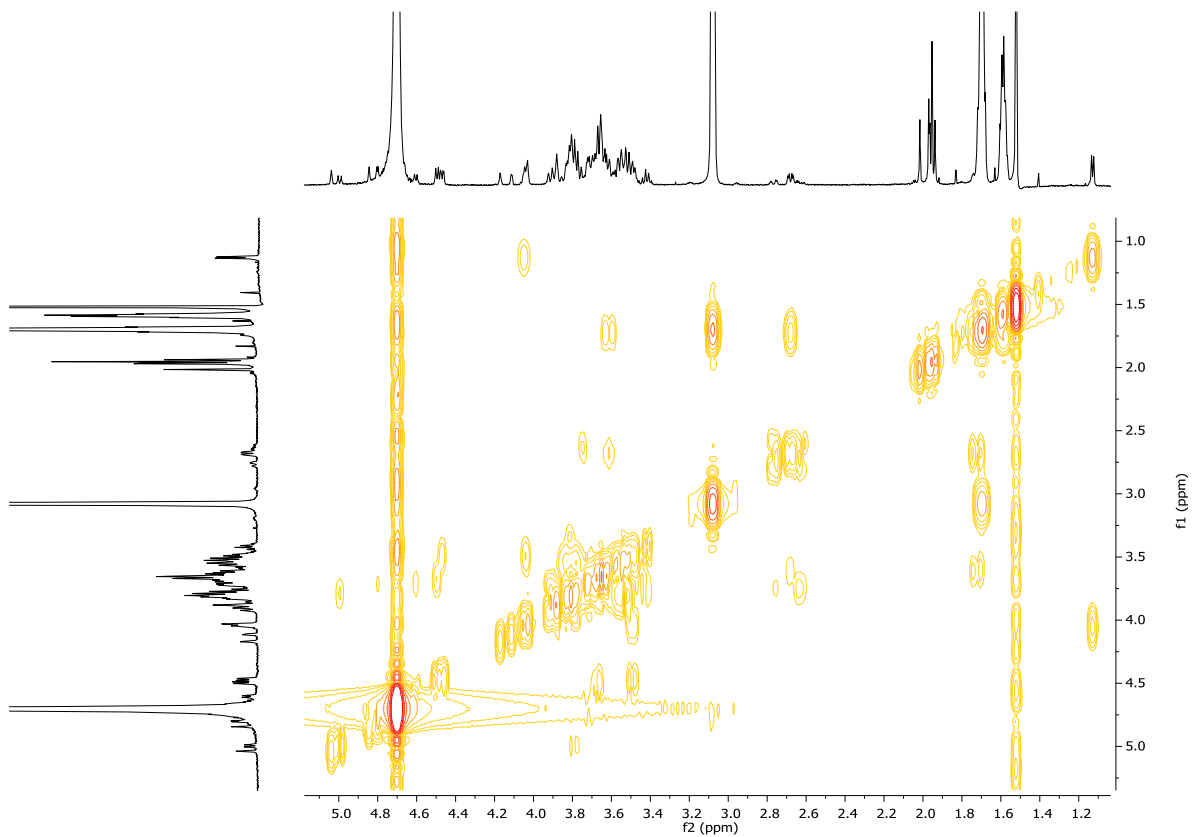

$^1\text{H}$ - $^1\text{H}$  TCOSY ( $\text{D}_2\text{O}$ , 600M Hz)

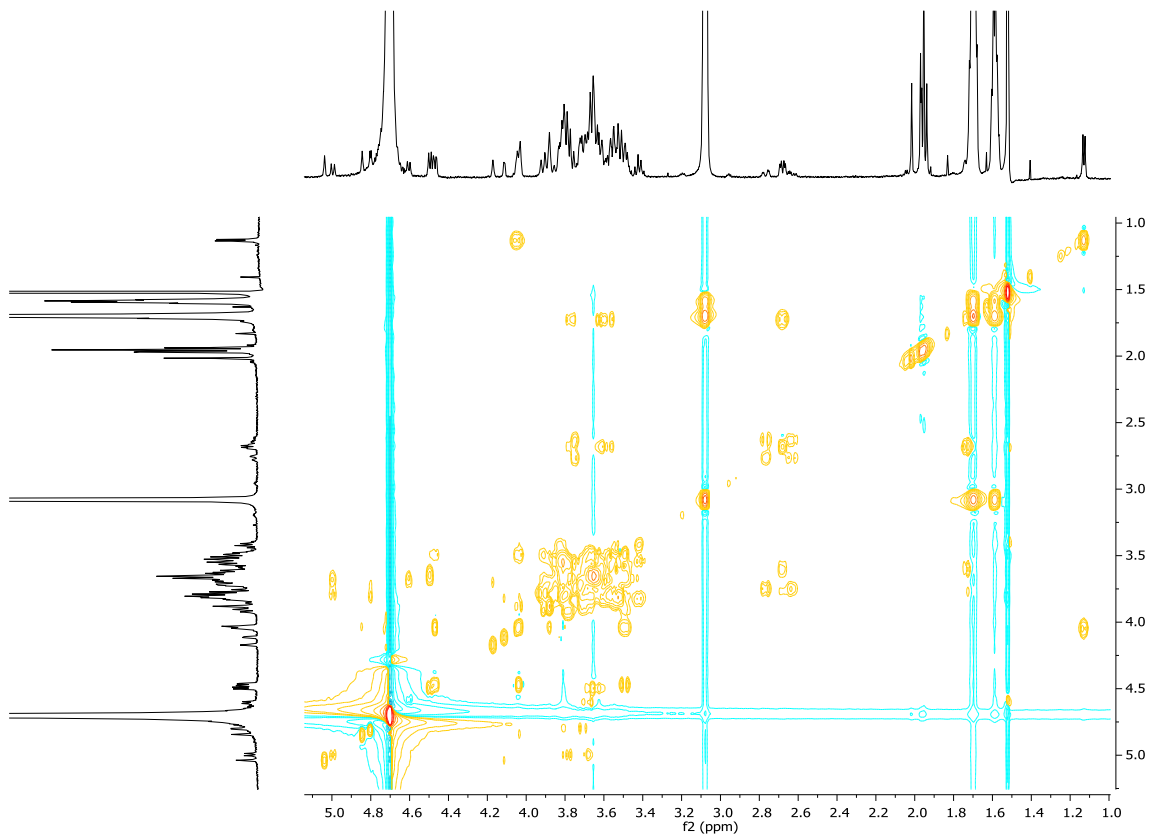

$^1\text{H}$ - $^{13}\text{C}$  HSQC ( $\text{D}_2\text{O}$ , 600M Hz)

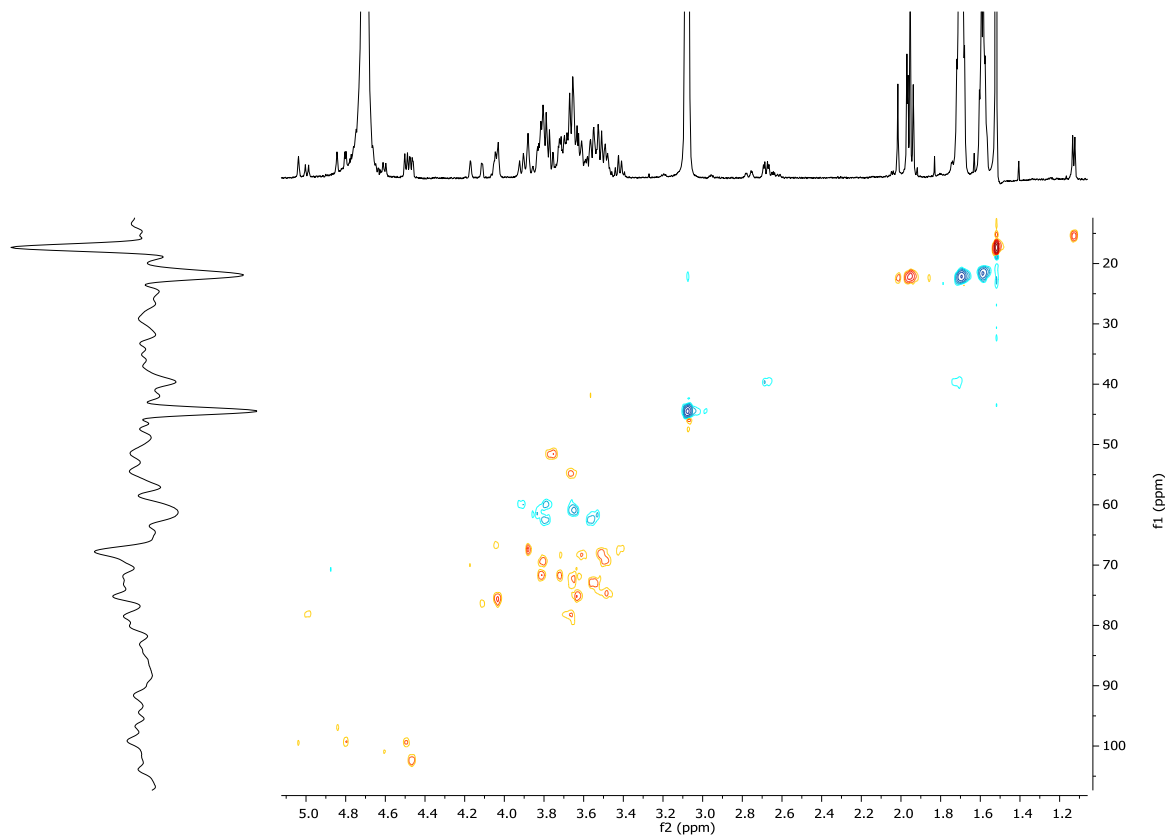

22

$^1\text{H}$  NMR ( $\text{D}_2\text{O}$ , 600M Hz)

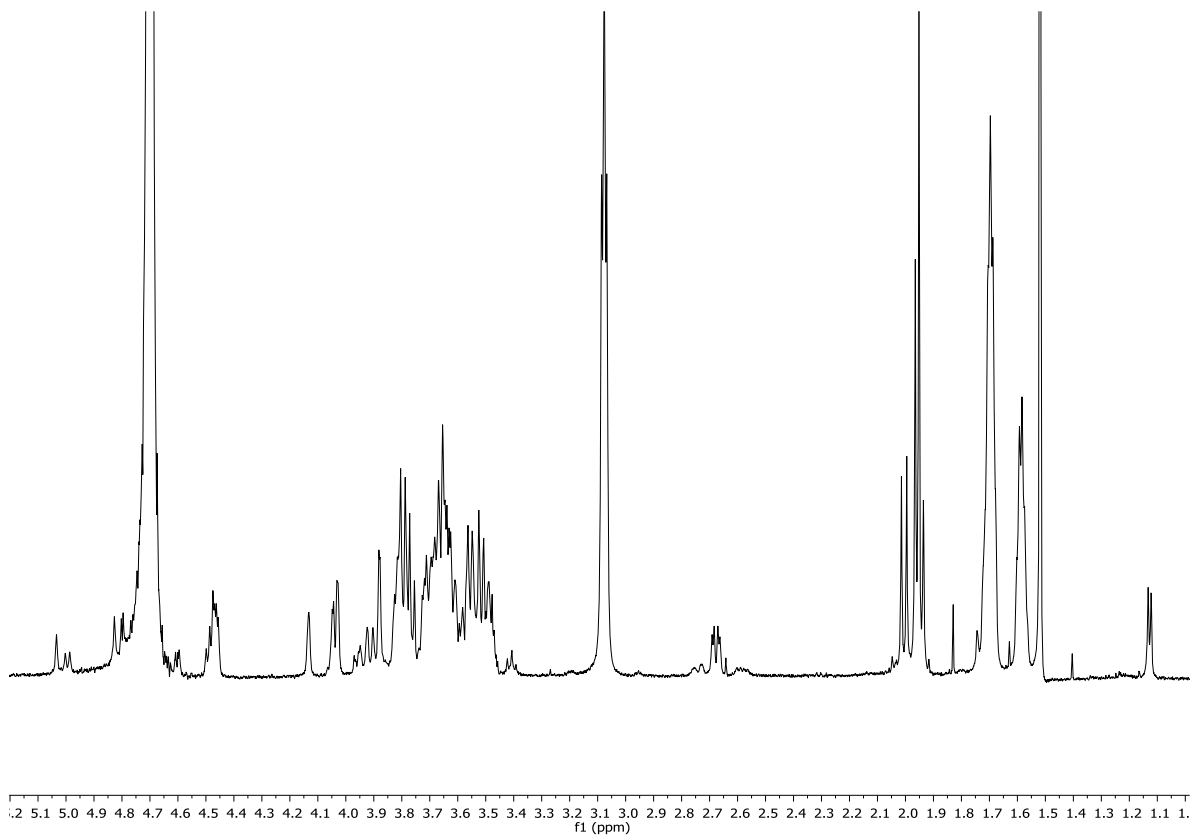

$^1\text{H}$ - $^1\text{H}$  COSY ( $\text{D}_2\text{O}$ , 600M Hz)

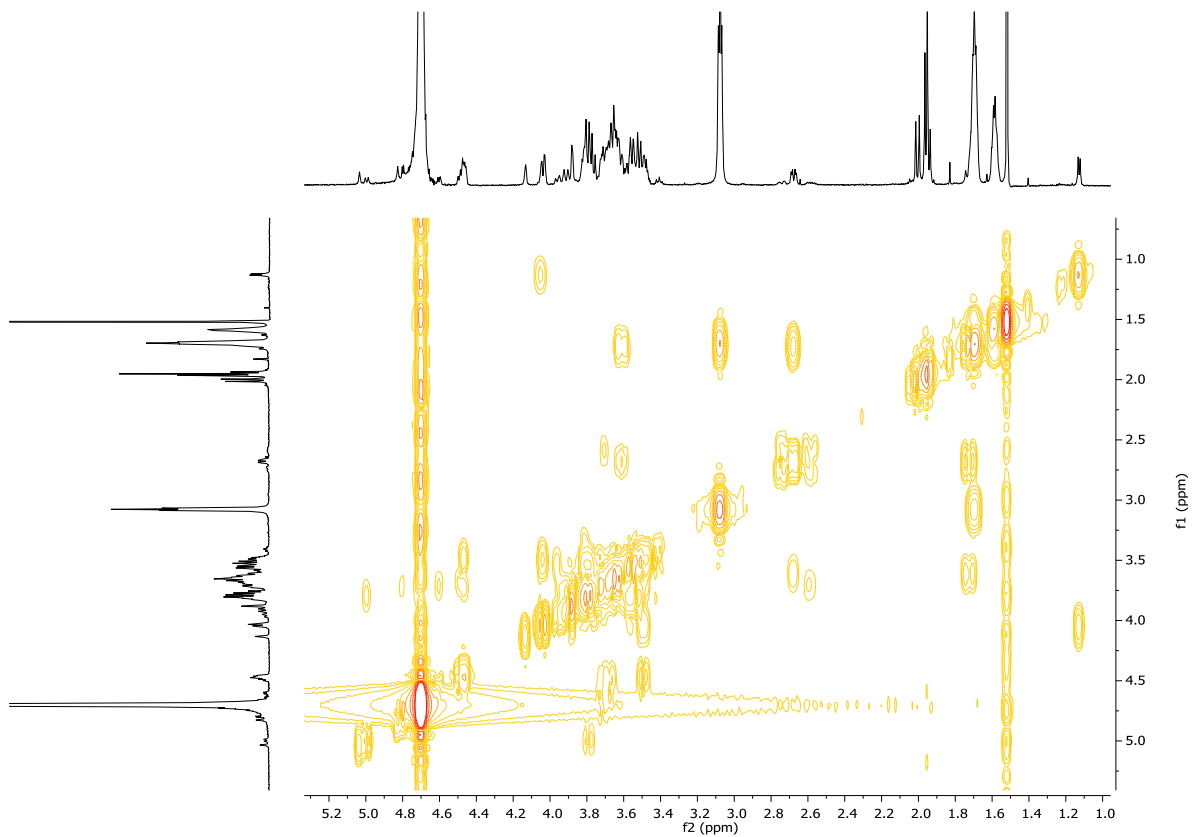

$^1\text{H}$ - $^1\text{H}$  TOSY ( $\text{D}_2\text{O}$ , 600M Hz)

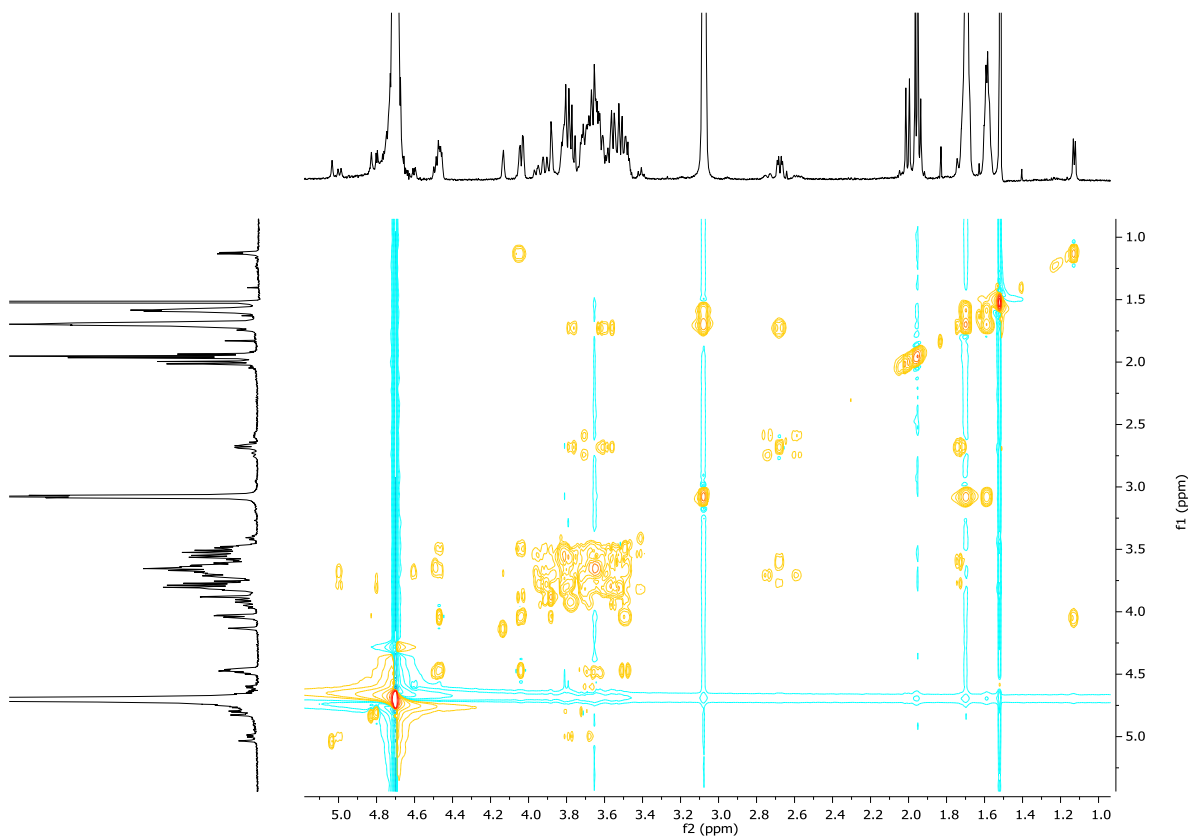

$^1\text{H}$ - $^{13}\text{C}$  HSQC ( $\text{D}_2\text{O}$ , 600M Hz)

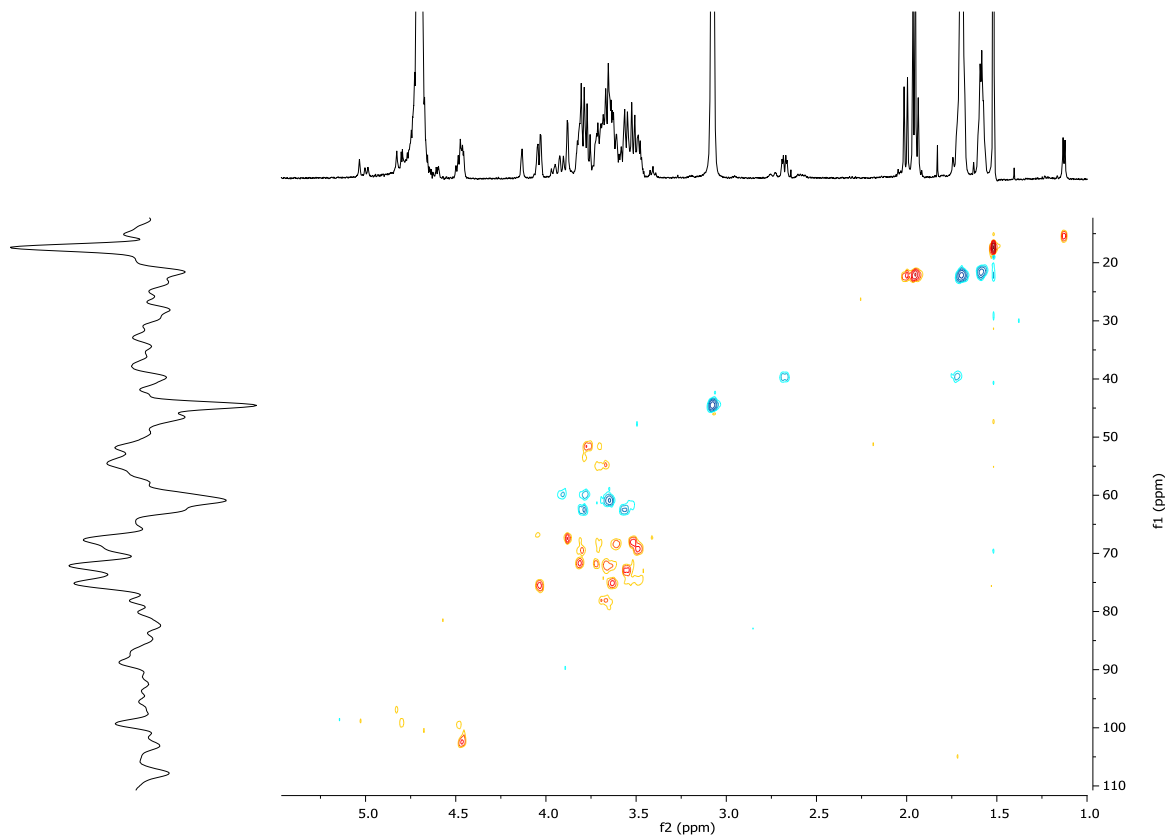

23

$^1\text{H}$  NMR ( $\text{D}_2\text{O}$ , 600M Hz)

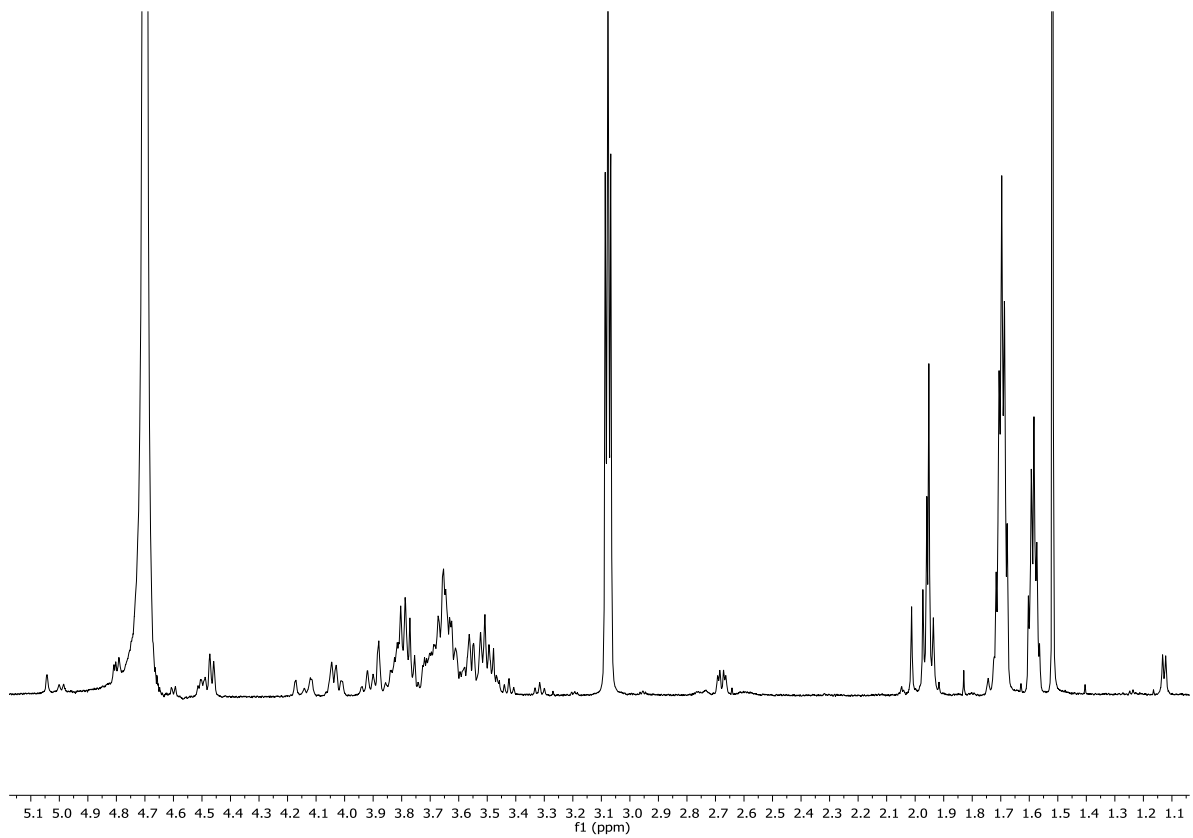

$^1\text{H}$ - $^1\text{H}$  COSY ( $\text{D}_2\text{O}$ , 600M Hz)

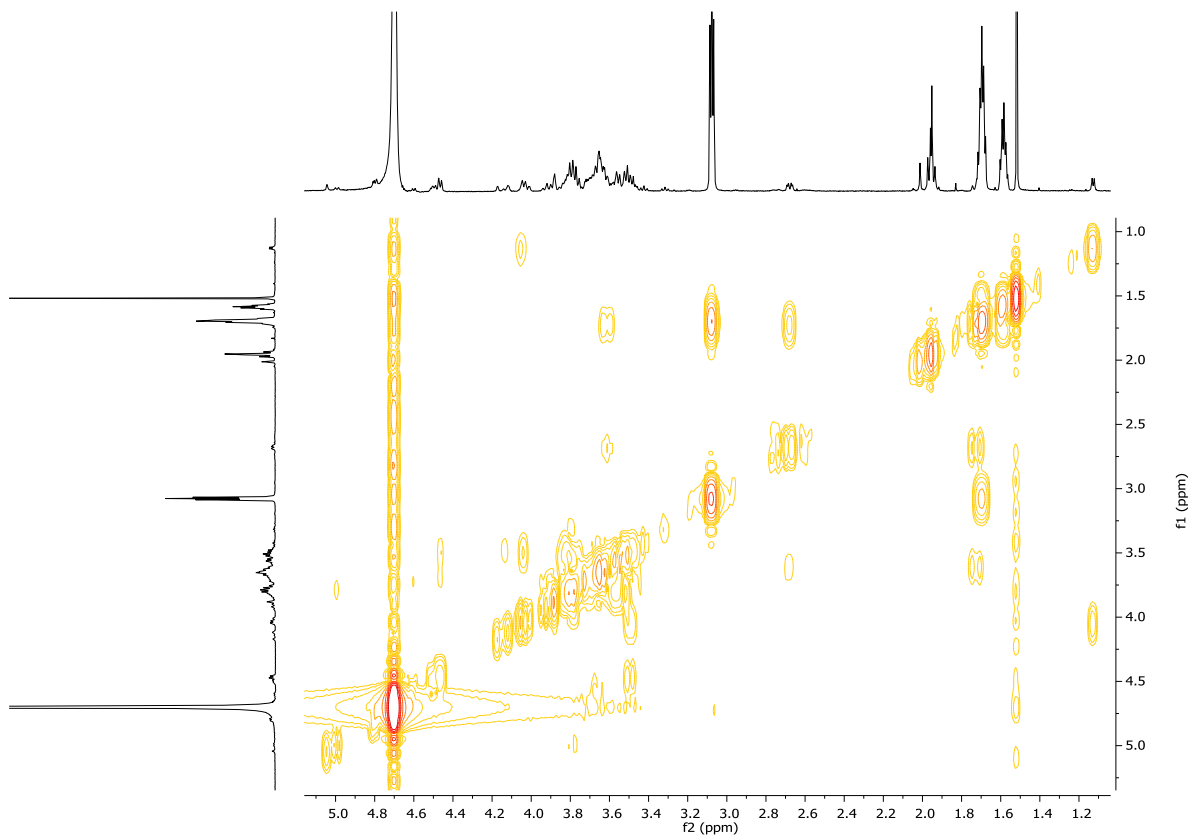

$^1\text{H}$ - $^1\text{H}$  TCOZY ( $\text{D}_2\text{O}$ , 600M Hz)

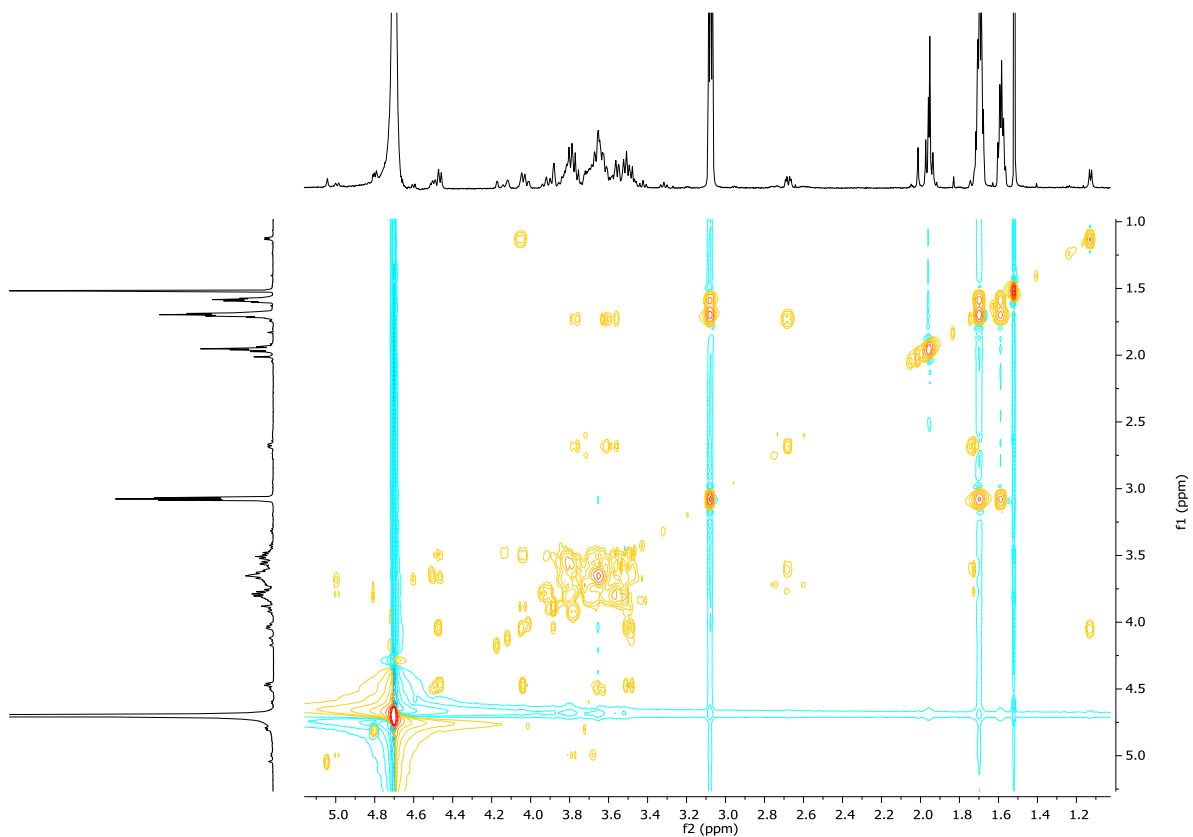

$^1\text{H}$ - $^{13}\text{C}$  HSQC ( $\text{D}_2\text{O}$ , 600M Hz)

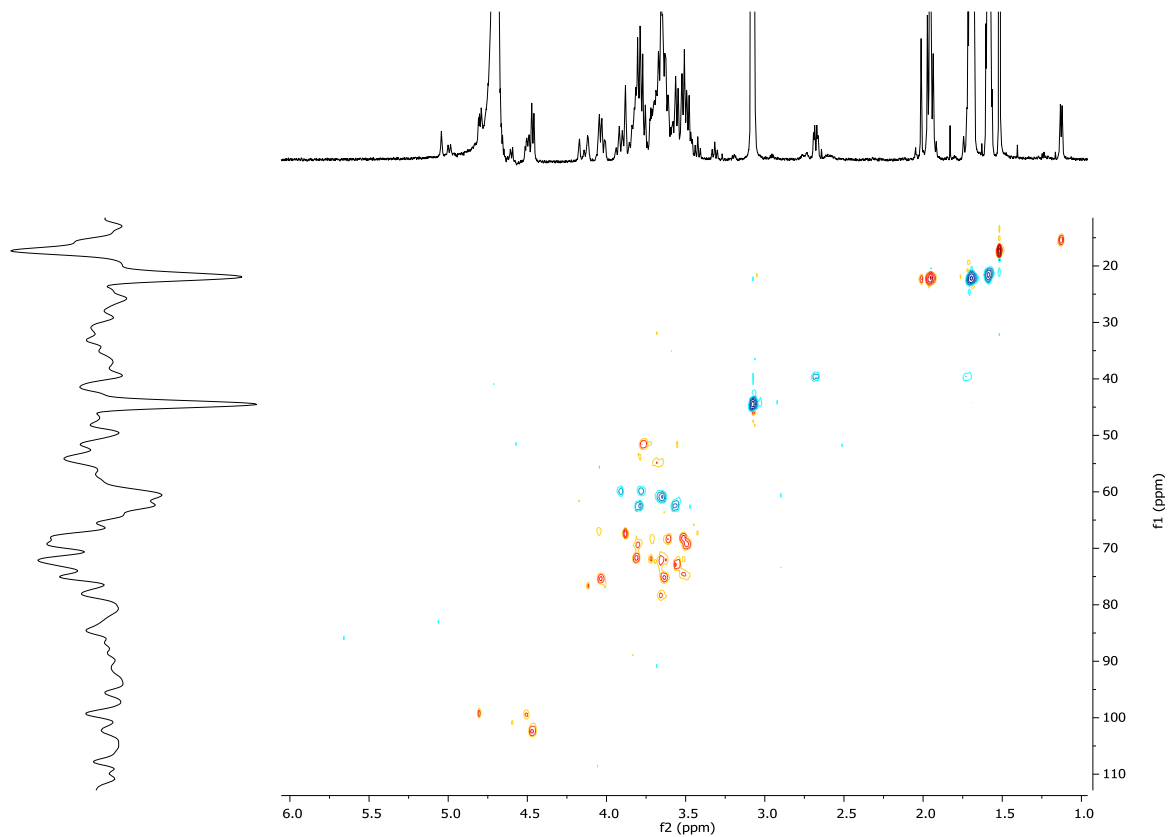

24

$^1\text{H}$  NMR ( $\text{D}_2\text{O}$ , 600M Hz)

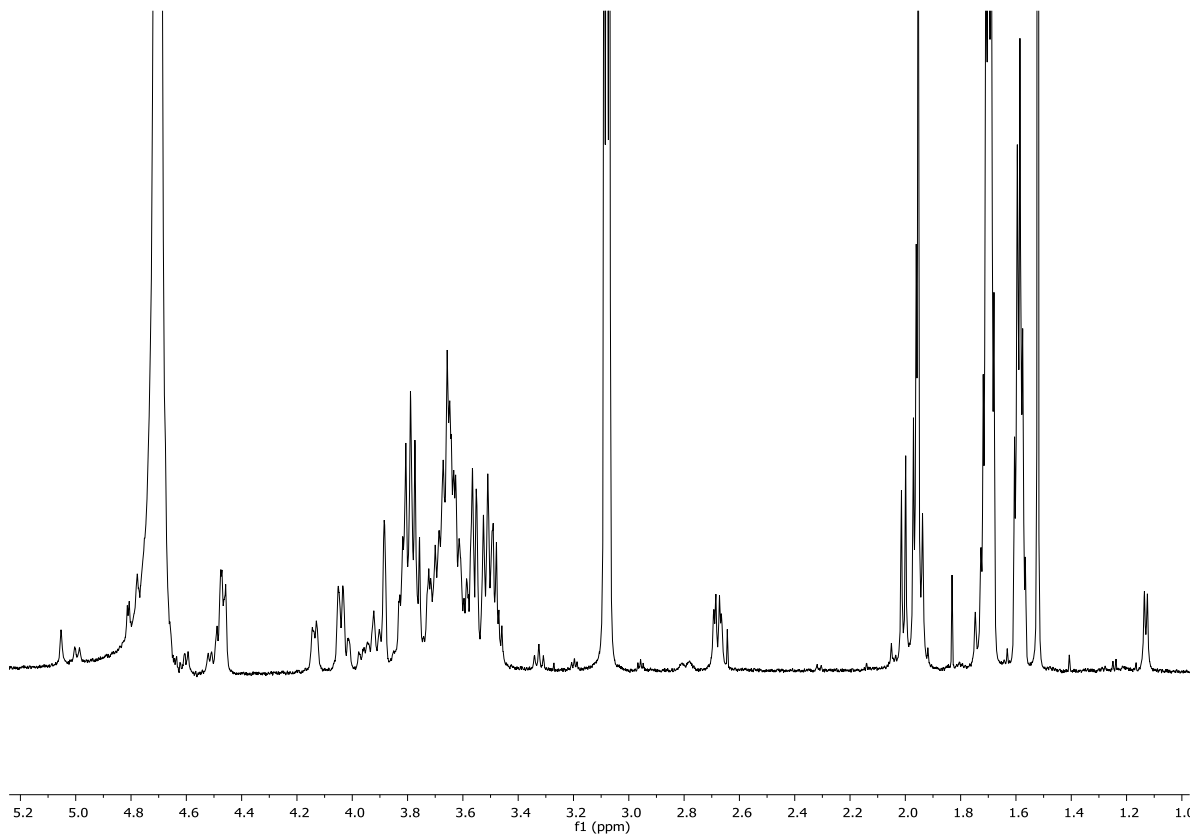



$^1\text{H}$ - $^1\text{H}$  COSY ( $\text{D}_2\text{O}$ , 600M Hz)

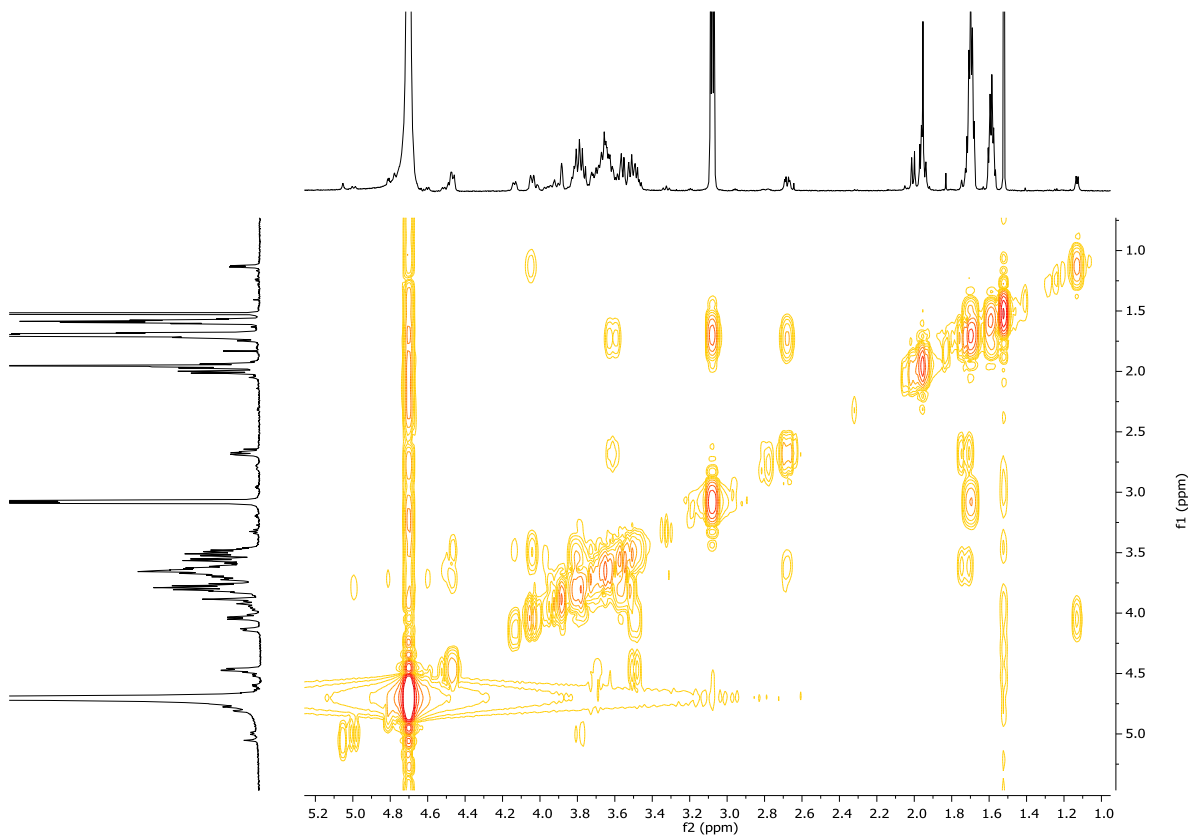

$^1\text{H}$ - $^1\text{H}$  TROSY ( $\text{D}_2\text{O}$ , 600M Hz)

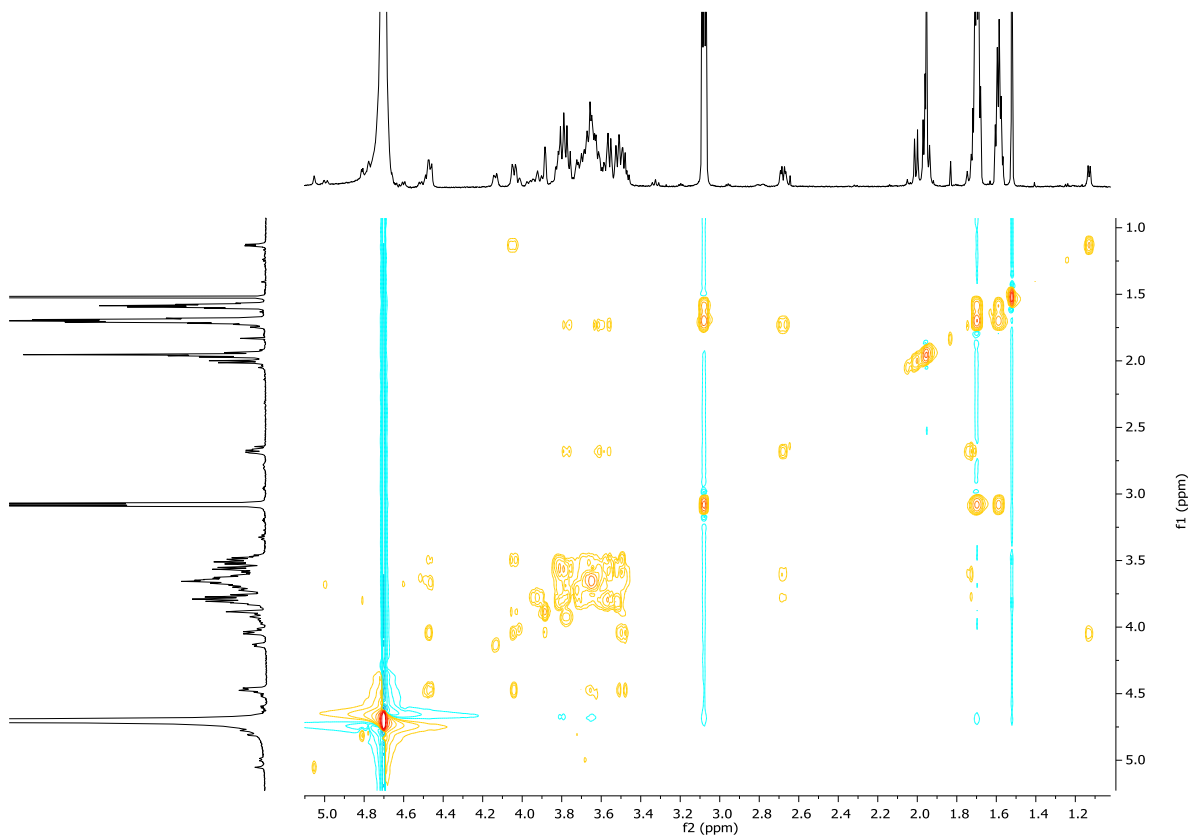

$^1\text{H}$ - $^{13}\text{C}$  HSQC ( $\text{D}_2\text{O}$ , 600M Hz)

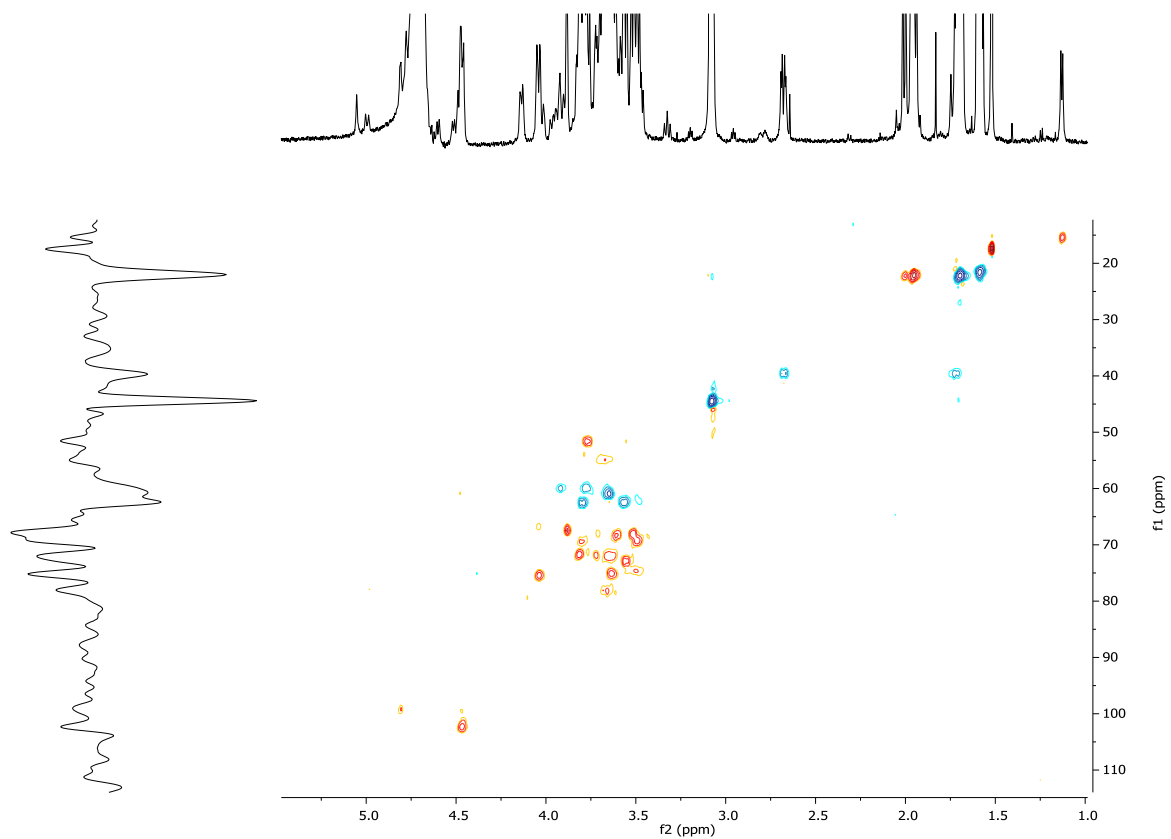

25

$^1\text{H}$  NMR ( $\text{D}_2\text{O}$ , 600M Hz)

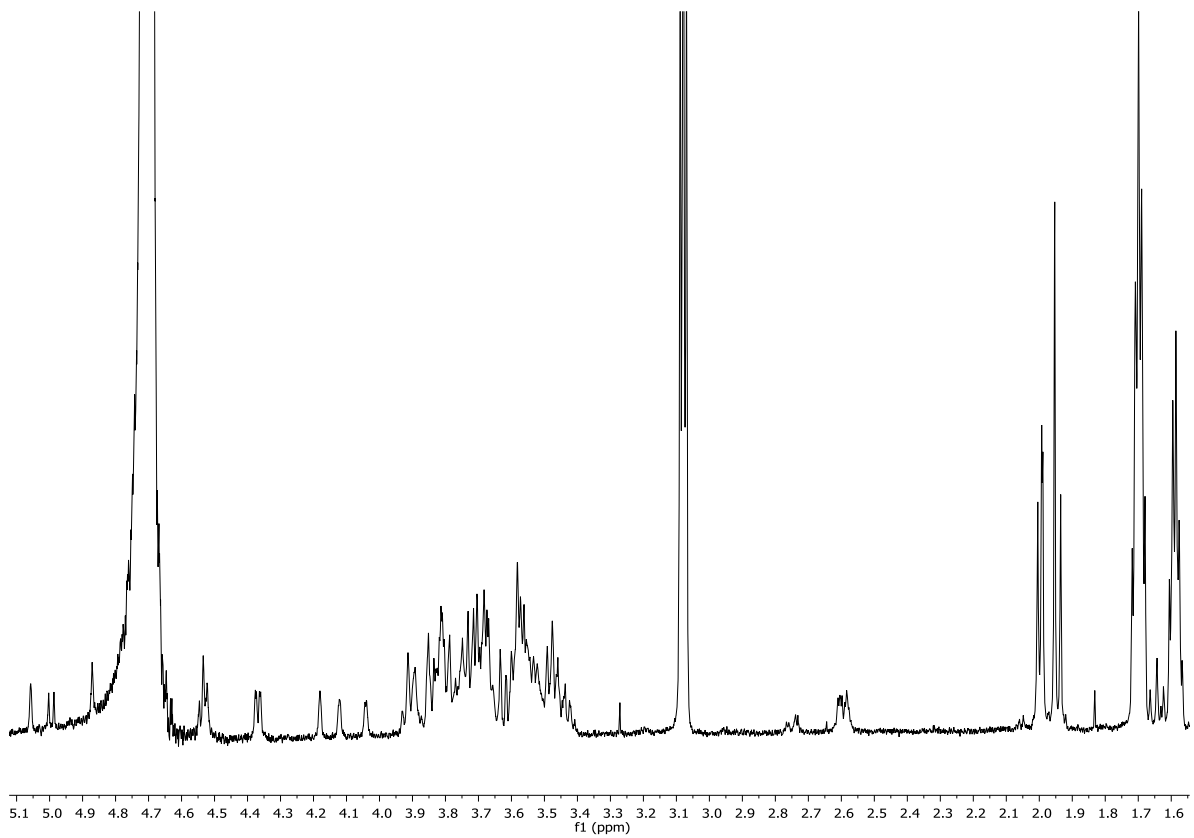

$^1\text{H}$ - $^1\text{H}$  COSY ( $\text{D}_2\text{O}$ , 600M Hz)

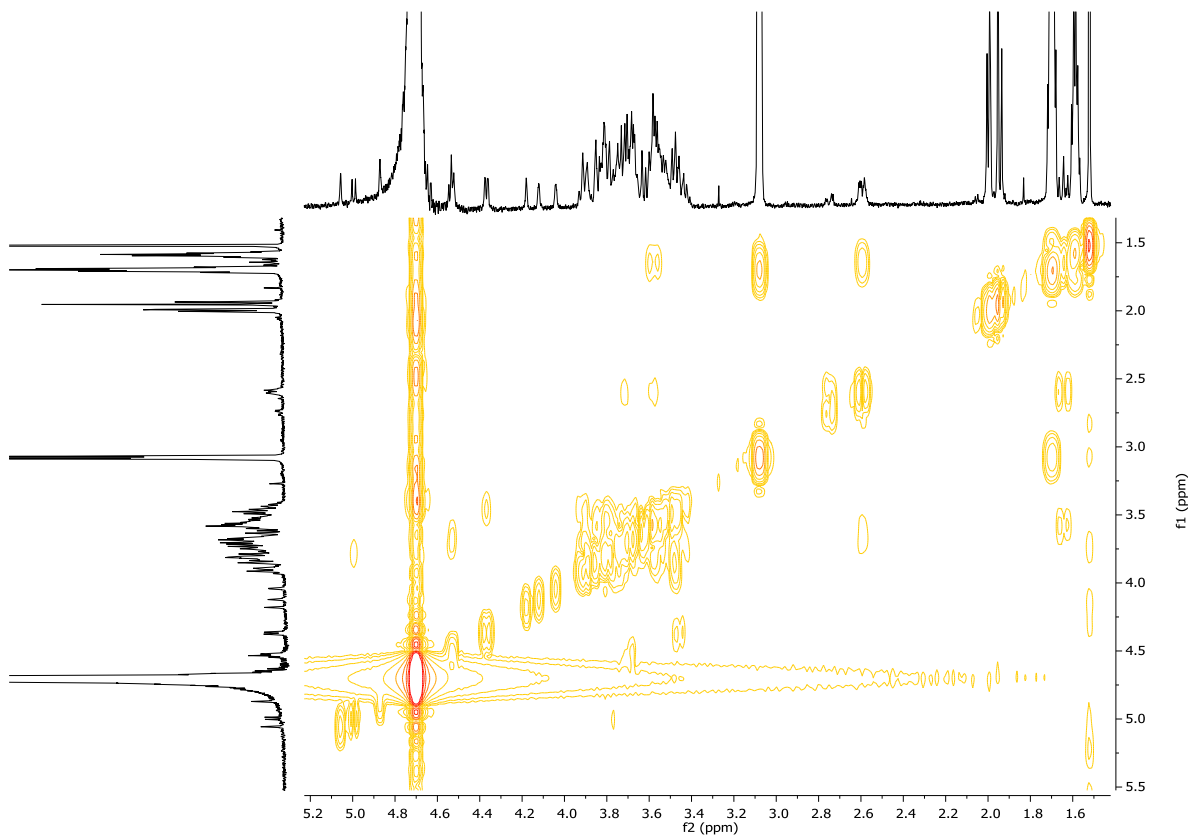

$^1\text{H}$ - $^1\text{H}$  TROSY ( $\text{D}_2\text{O}$ , 600M Hz)

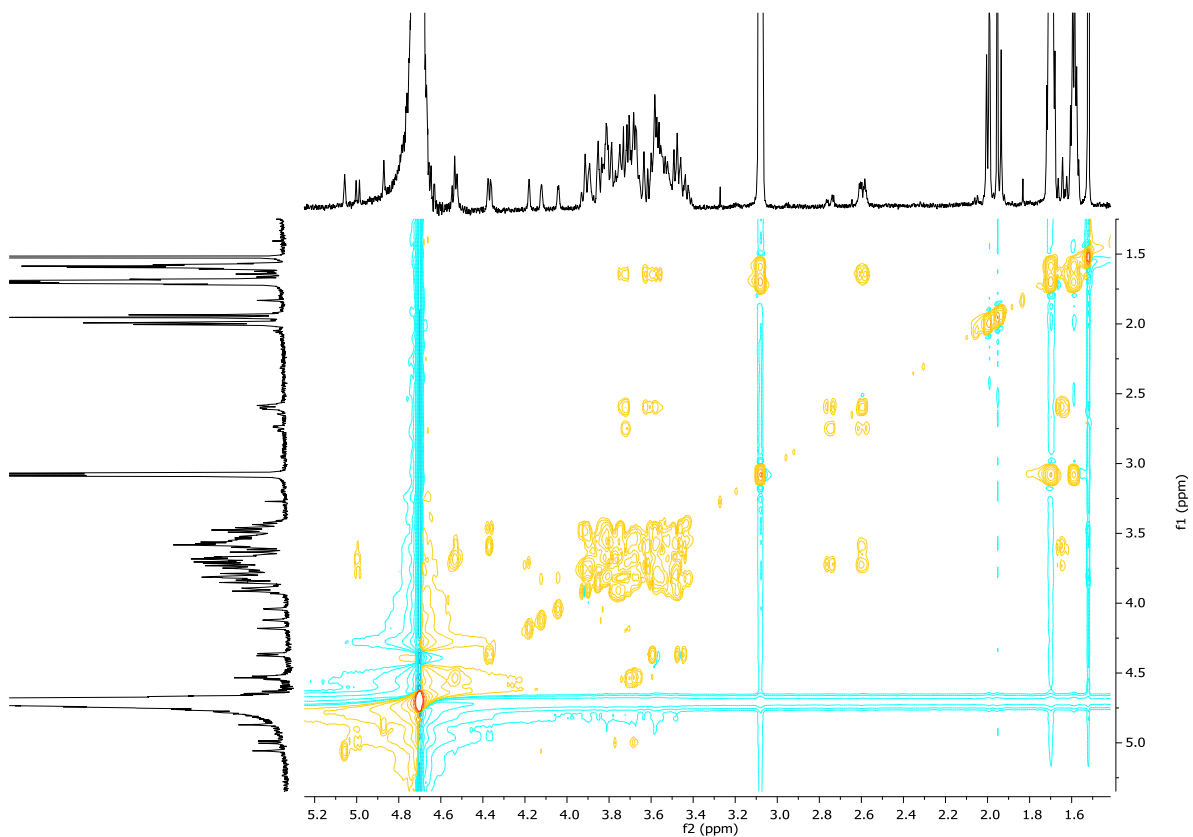

$^1\text{H}$ - $^{13}\text{C}$  HSQC ( $\text{D}_2\text{O}$ , 600M Hz)

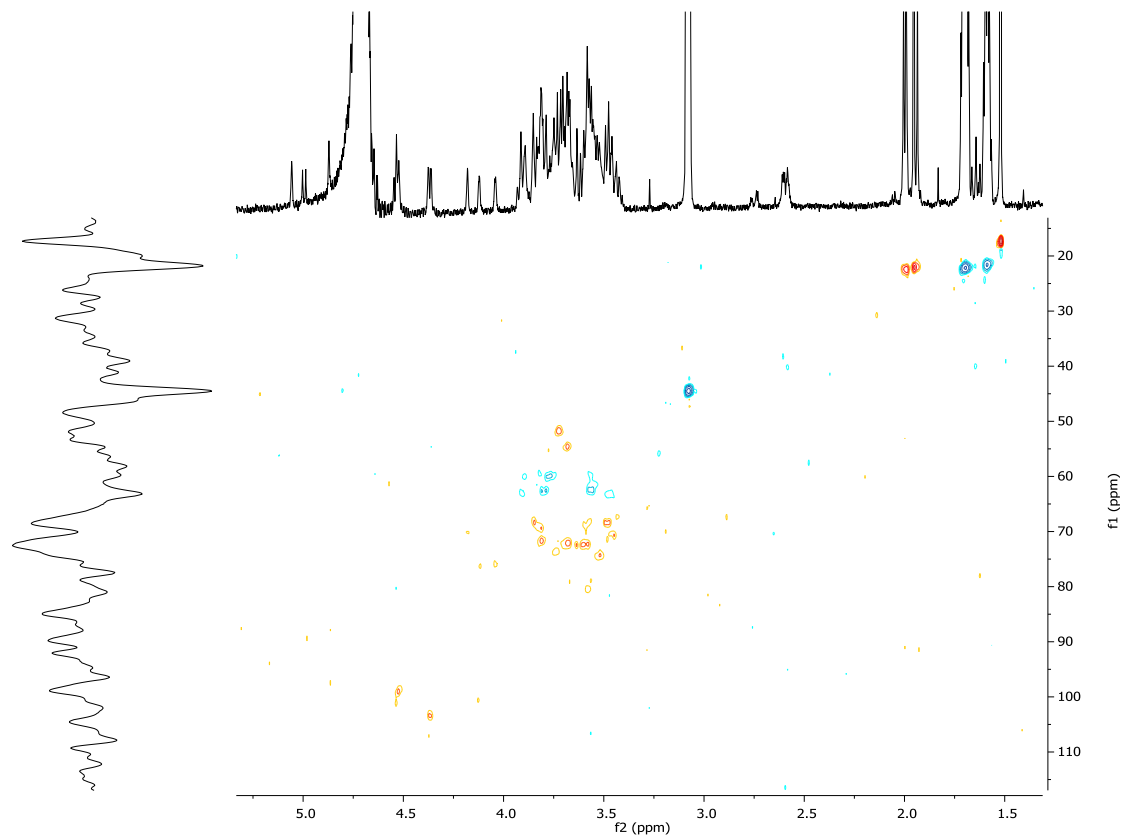

26

$^1\text{H}$  NMR ( $\text{D}_2\text{O}$ , 600M Hz)

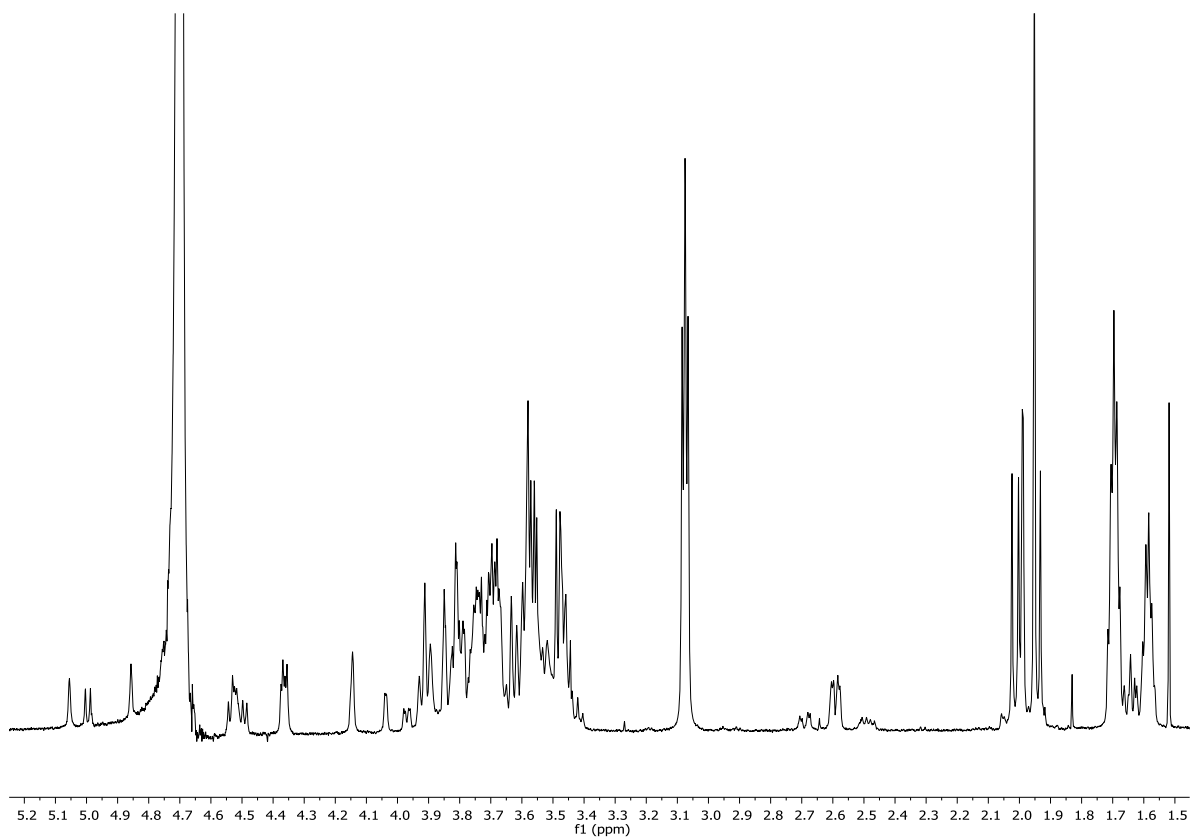

$^1\text{H}$ - $^1\text{H}$  COSY ( $\text{D}_2\text{O}$ , 600M Hz)

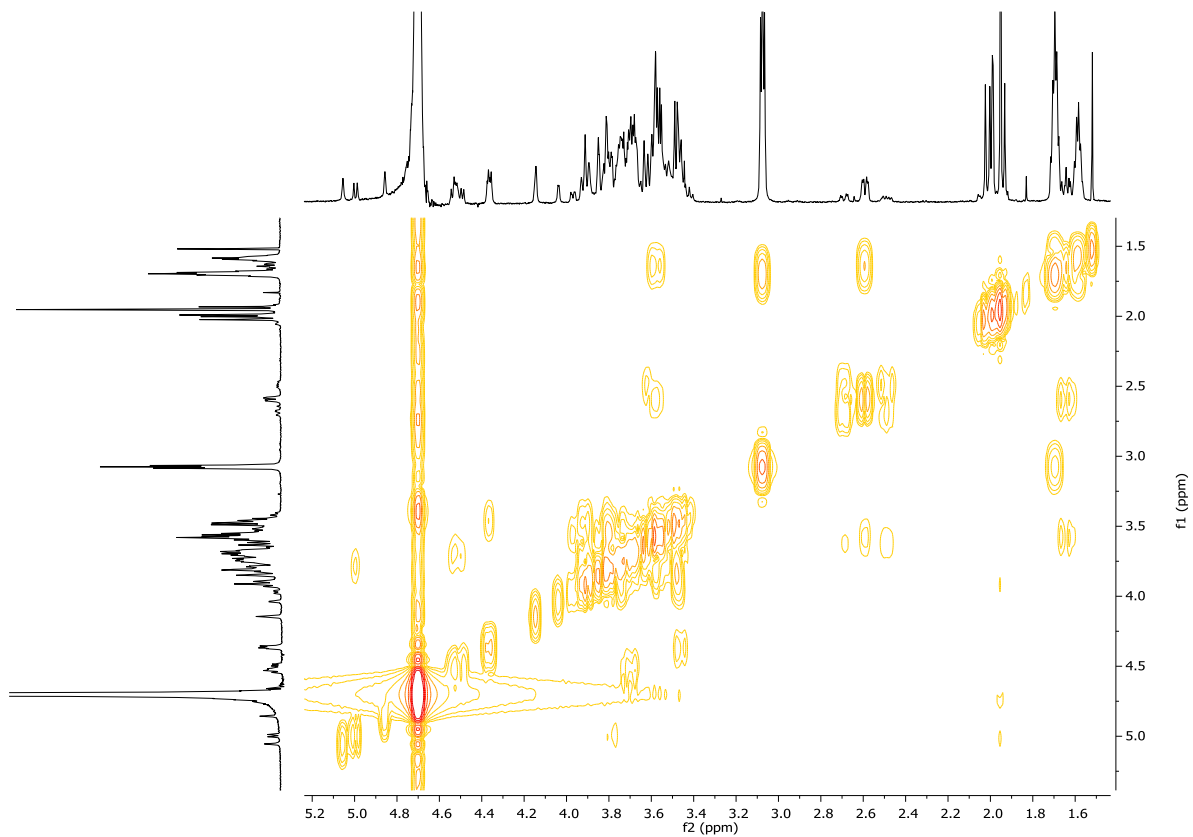

$^1\text{H}$ - $^1\text{H}$  TCOY ( $\text{D}_2\text{O}$ , 600M Hz)

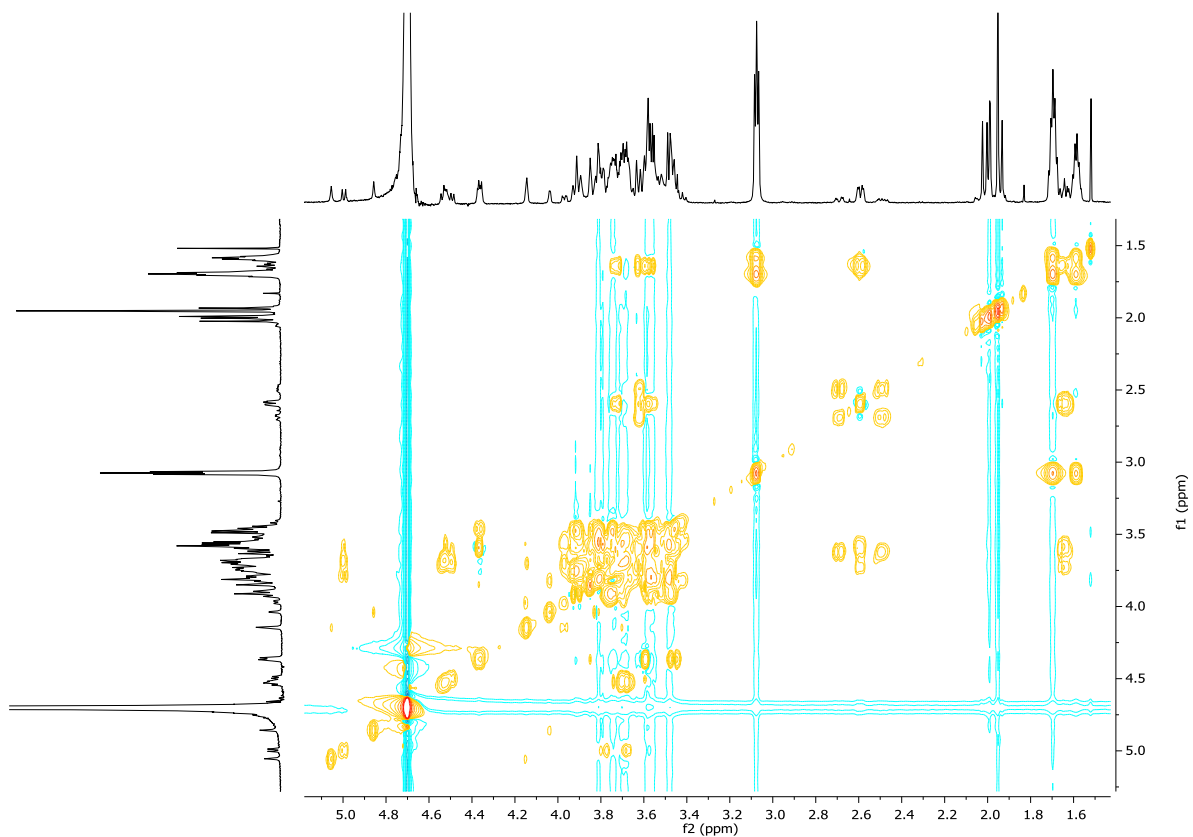



$^1\text{H}$ - $^1\text{H}$  COSY ( $\text{D}_2\text{O}$ , 600M Hz)

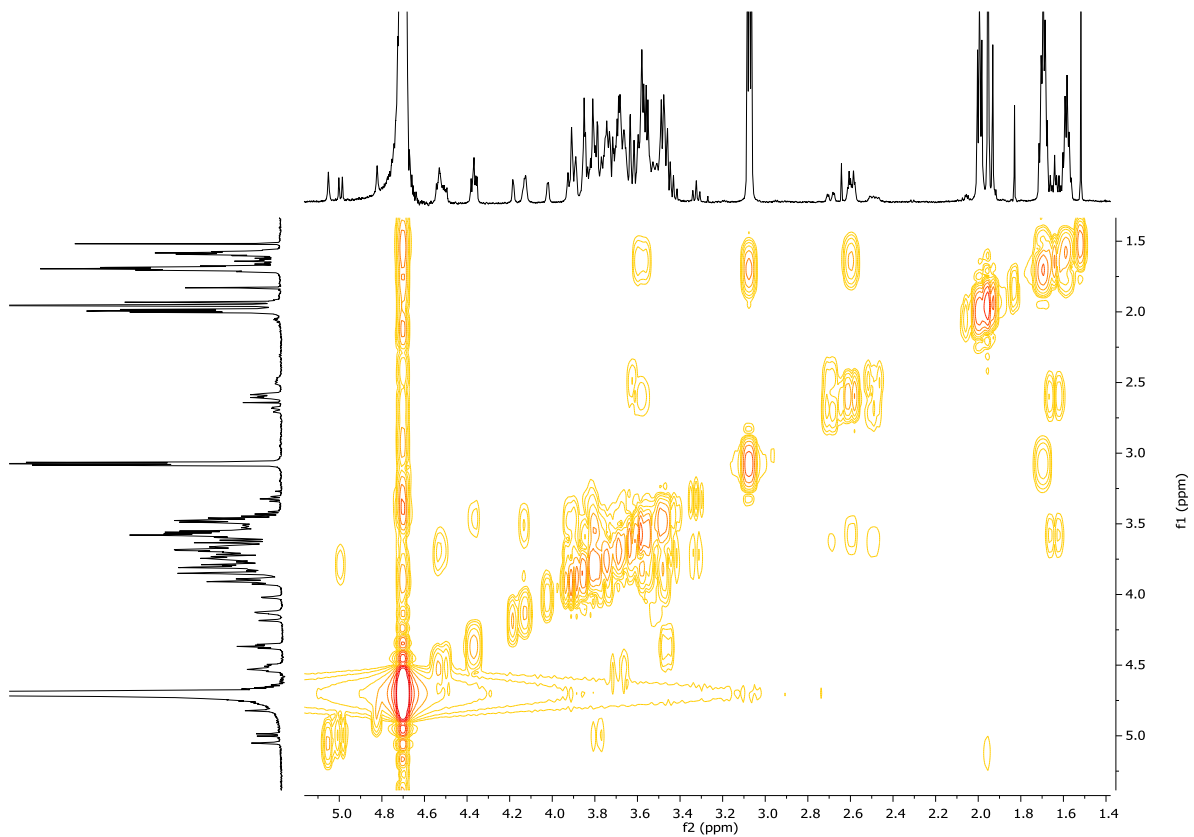

$^1\text{H}$ - $^1\text{H}$  TROSY ( $\text{D}_2\text{O}$ , 600M Hz)

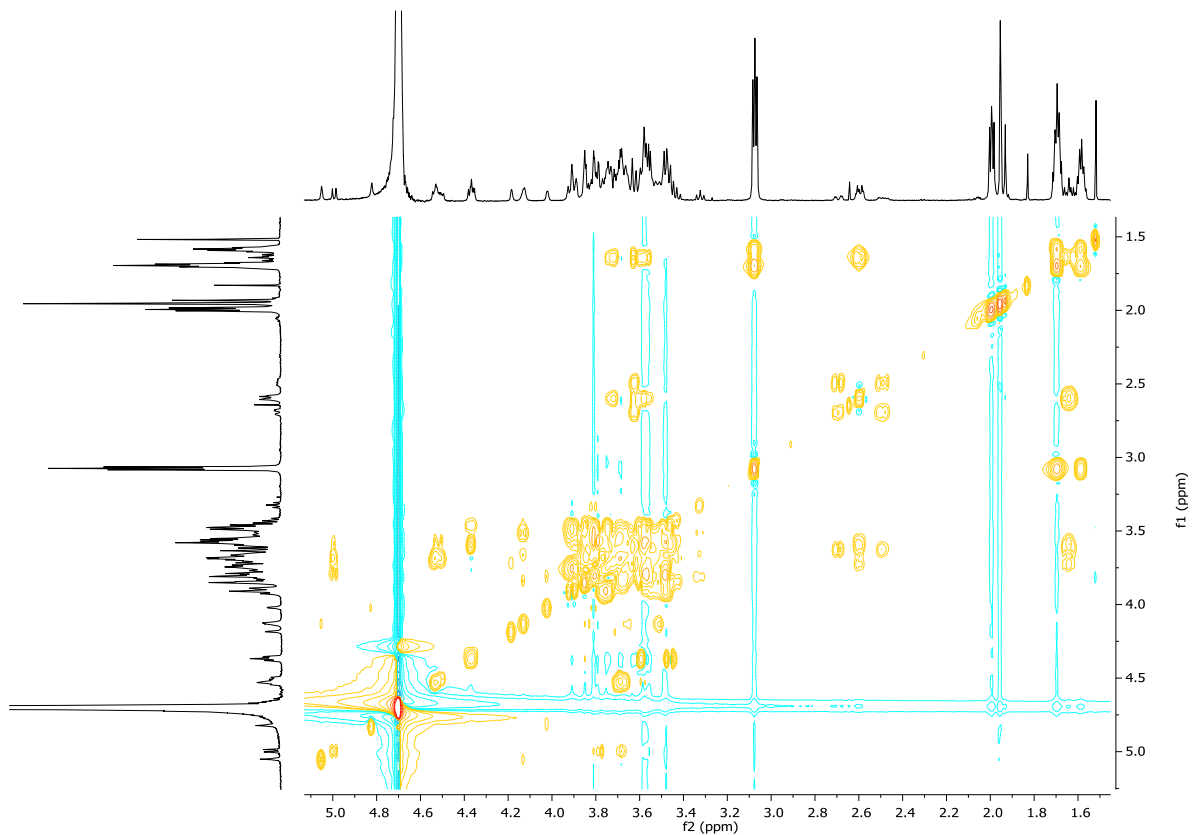

$^1\text{H}$ - $^{13}\text{C}$  HSQC ( $\text{D}_2\text{O}$ , 600M Hz)

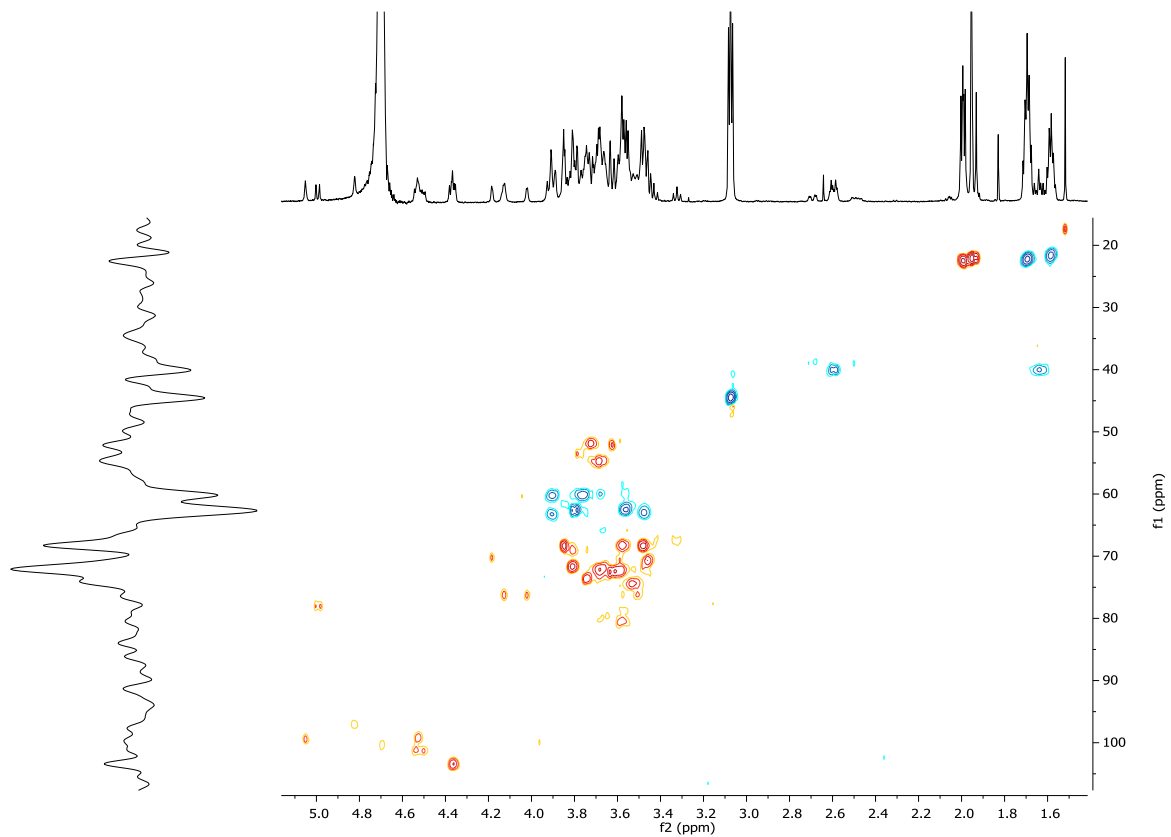

28

$^1\text{H}$  NMR ( $\text{D}_2\text{O}$ , 600M Hz)

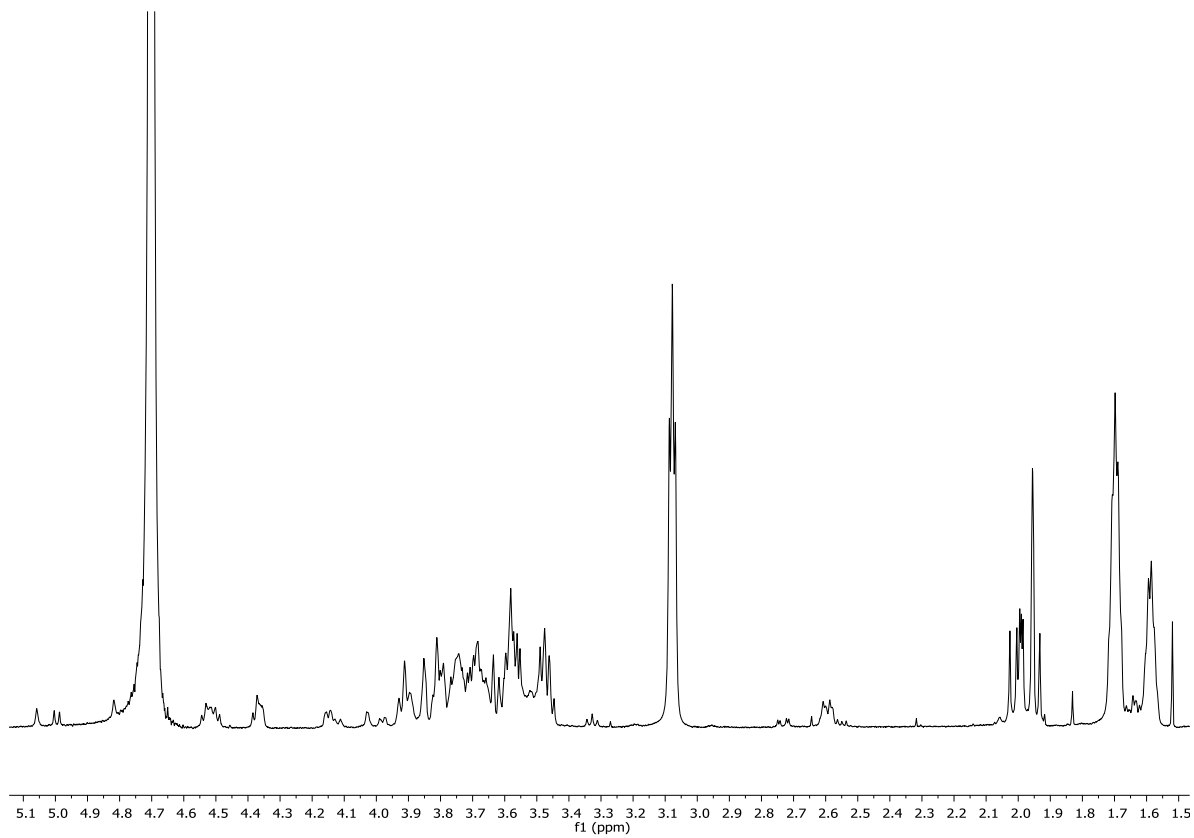



$^1\text{H}$ - $^1\text{H}$  COSY ( $\text{D}_2\text{O}$ , 600M Hz)

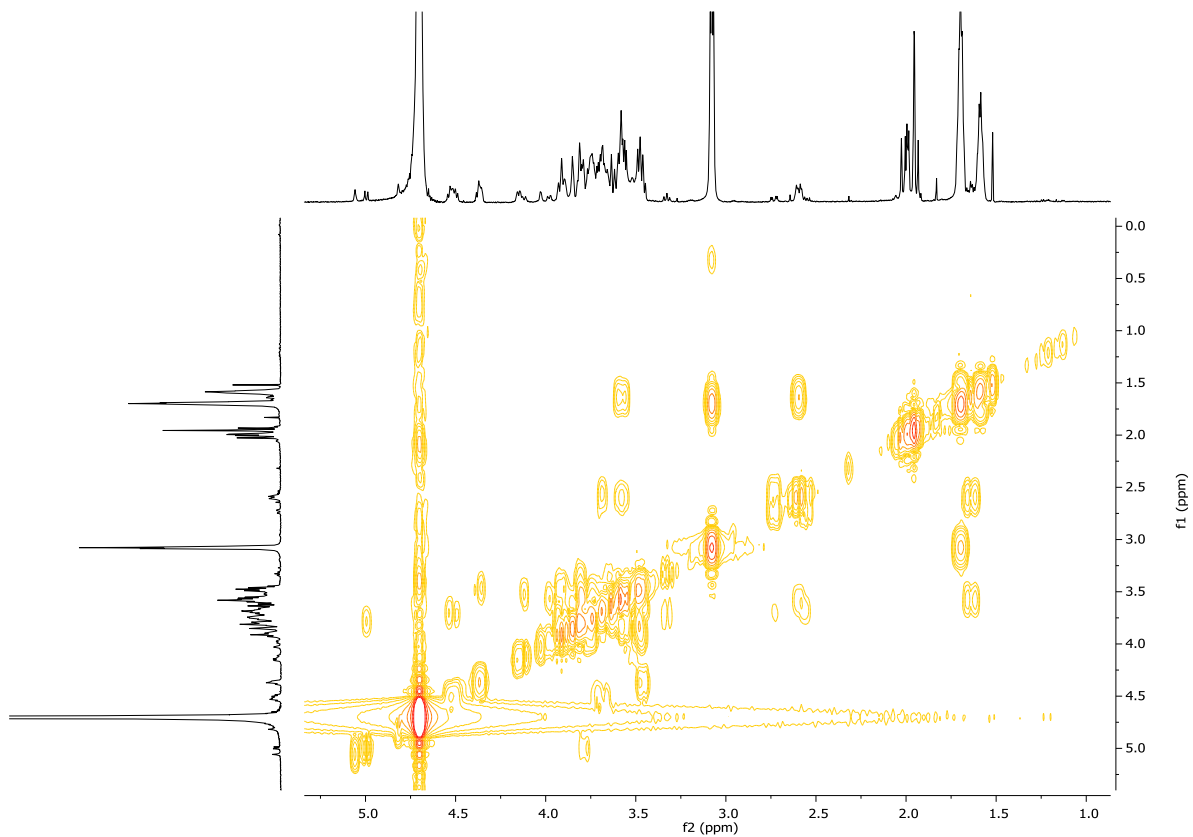

$^1\text{H}$ - $^1\text{H}$  TOSY ( $\text{D}_2\text{O}$ , 600M Hz)

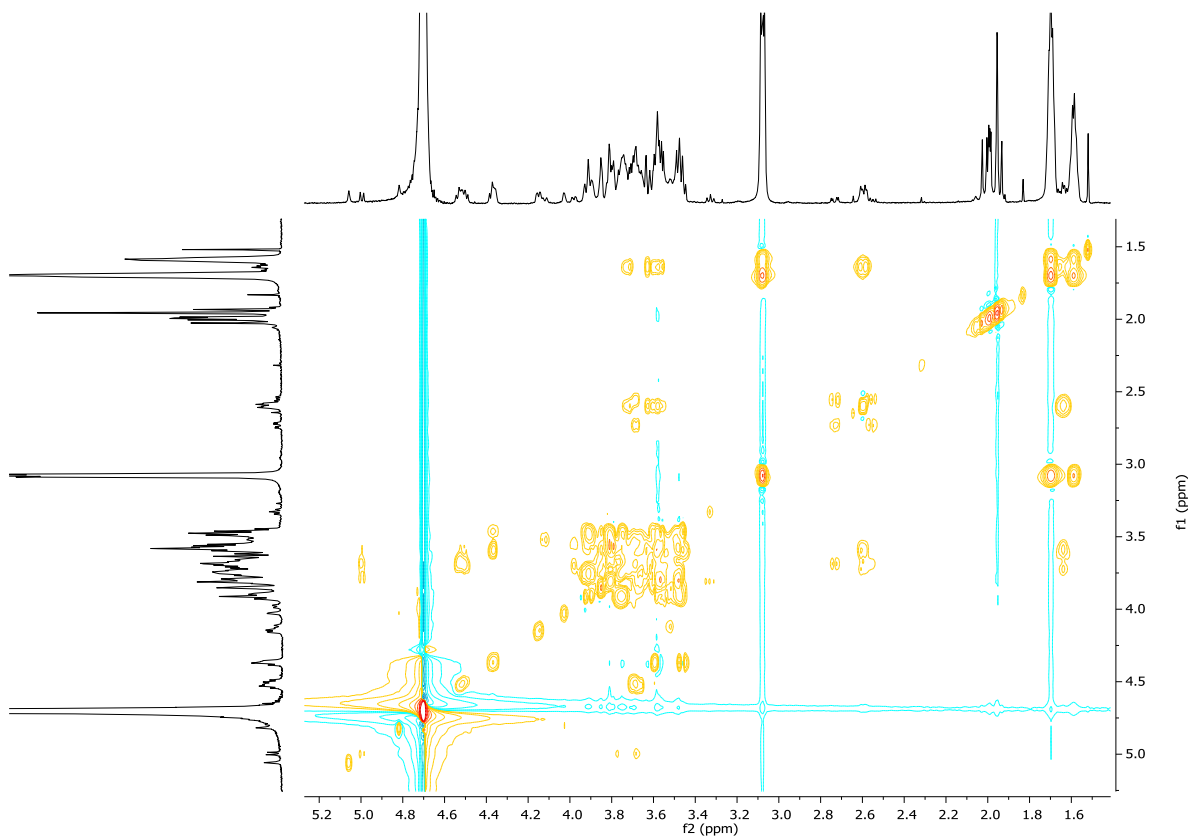

$^1\text{H}$ - $^{13}\text{C}$  HSQC ( $\text{D}_2\text{O}$ , 600M Hz)

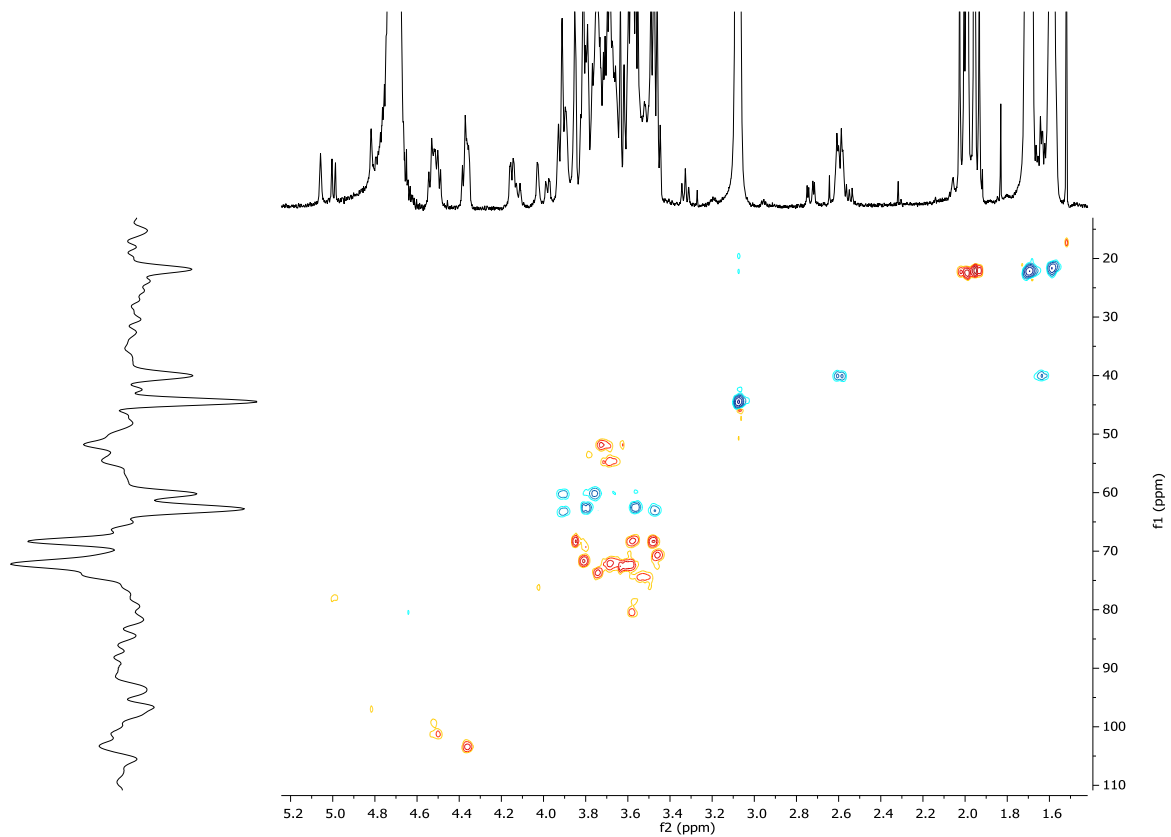

29

$^1\text{H}$  NMR ( $\text{D}_2\text{O}$ , 600M Hz)

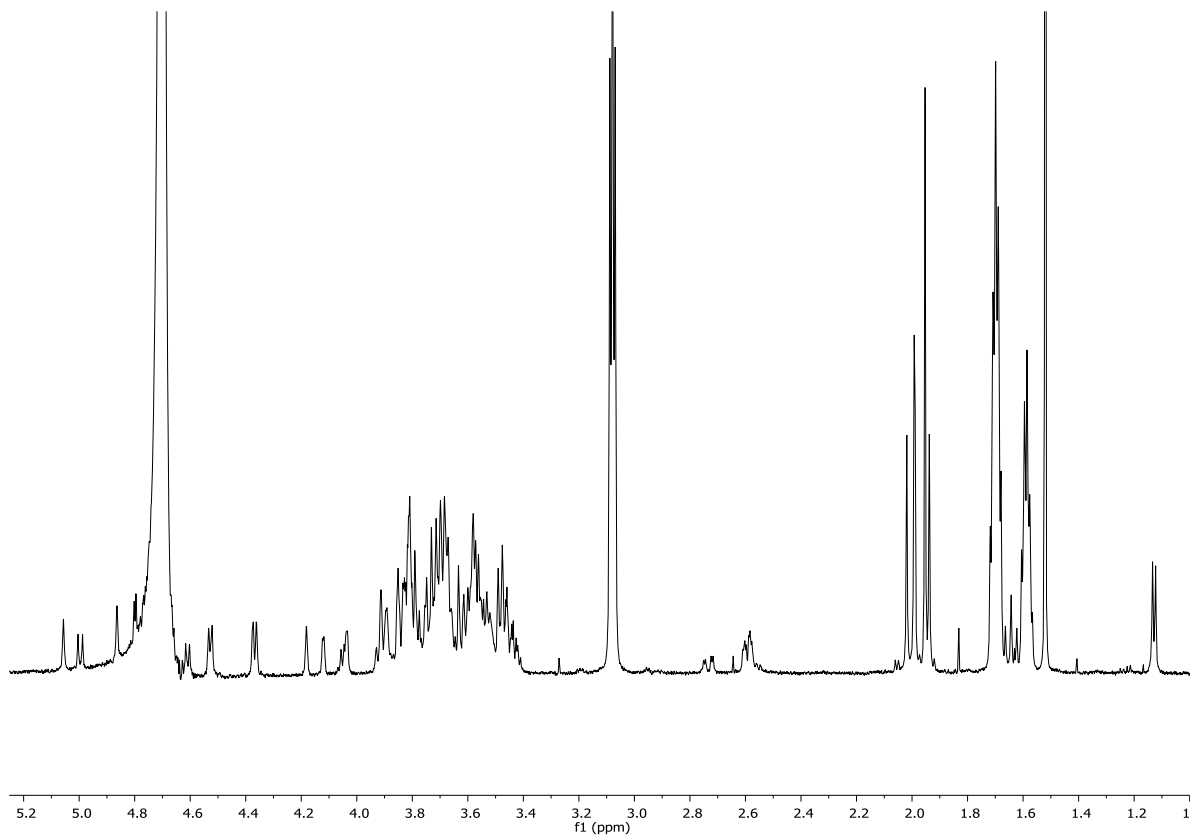

$^1\text{H}$ - $^1\text{H}$  COSY ( $\text{D}_2\text{O}$ , 600M Hz)

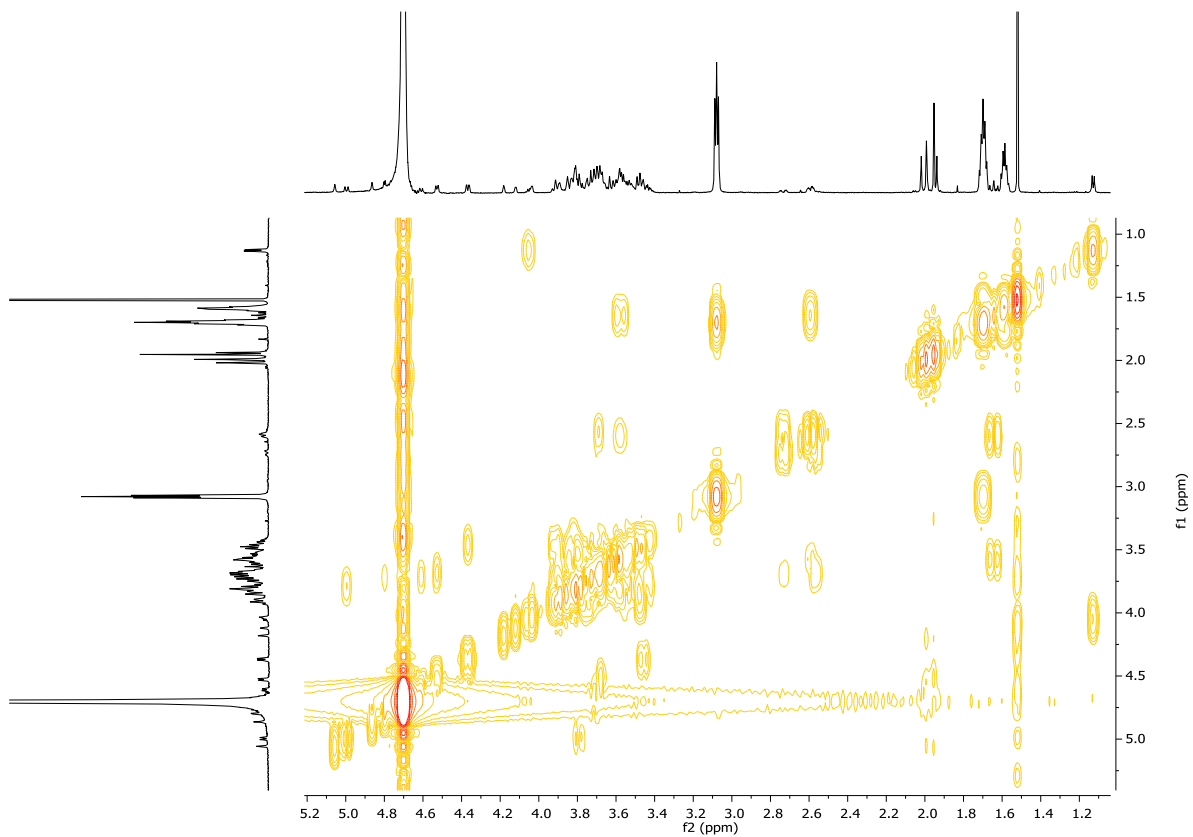

$^1\text{H}$ - $^1\text{H}$  TCOZY ( $\text{D}_2\text{O}$ , 600M Hz)

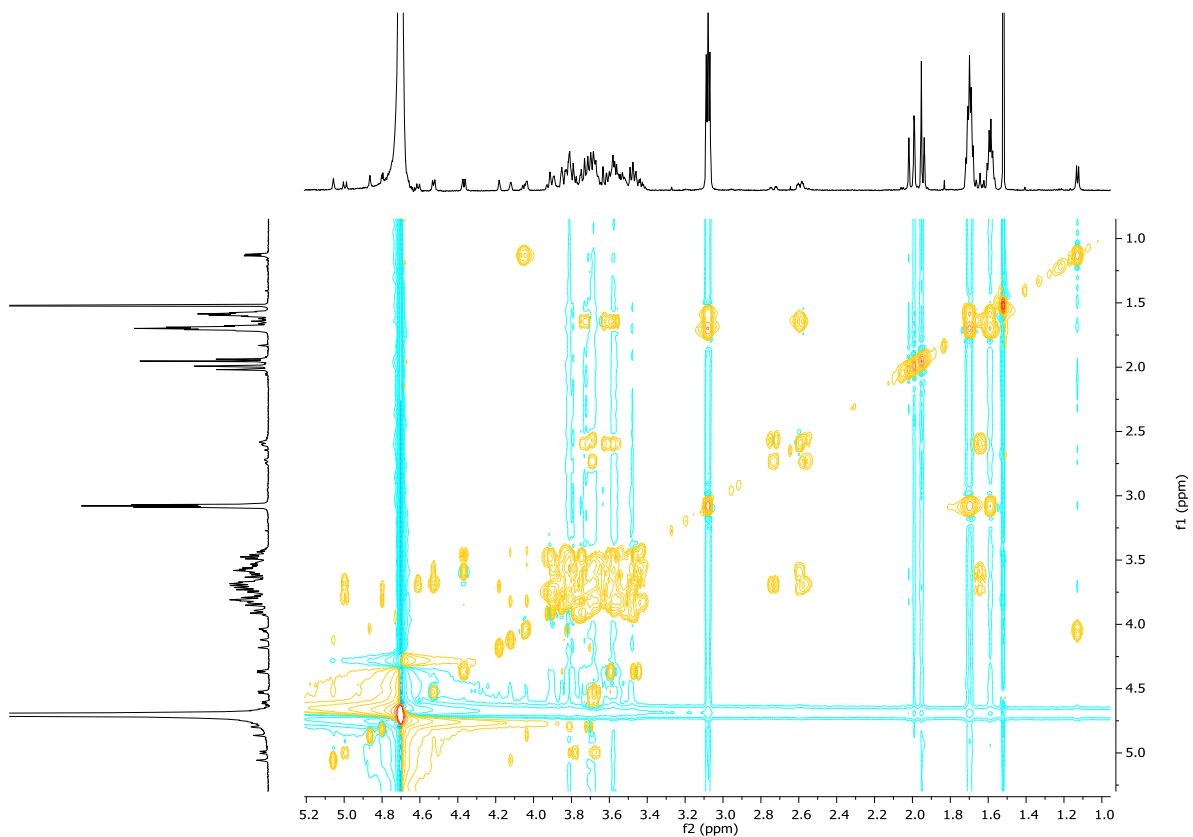

$^1\text{H}$ - $^{13}\text{C}$  HSQC ( $\text{D}_2\text{O}$ , 600M Hz)

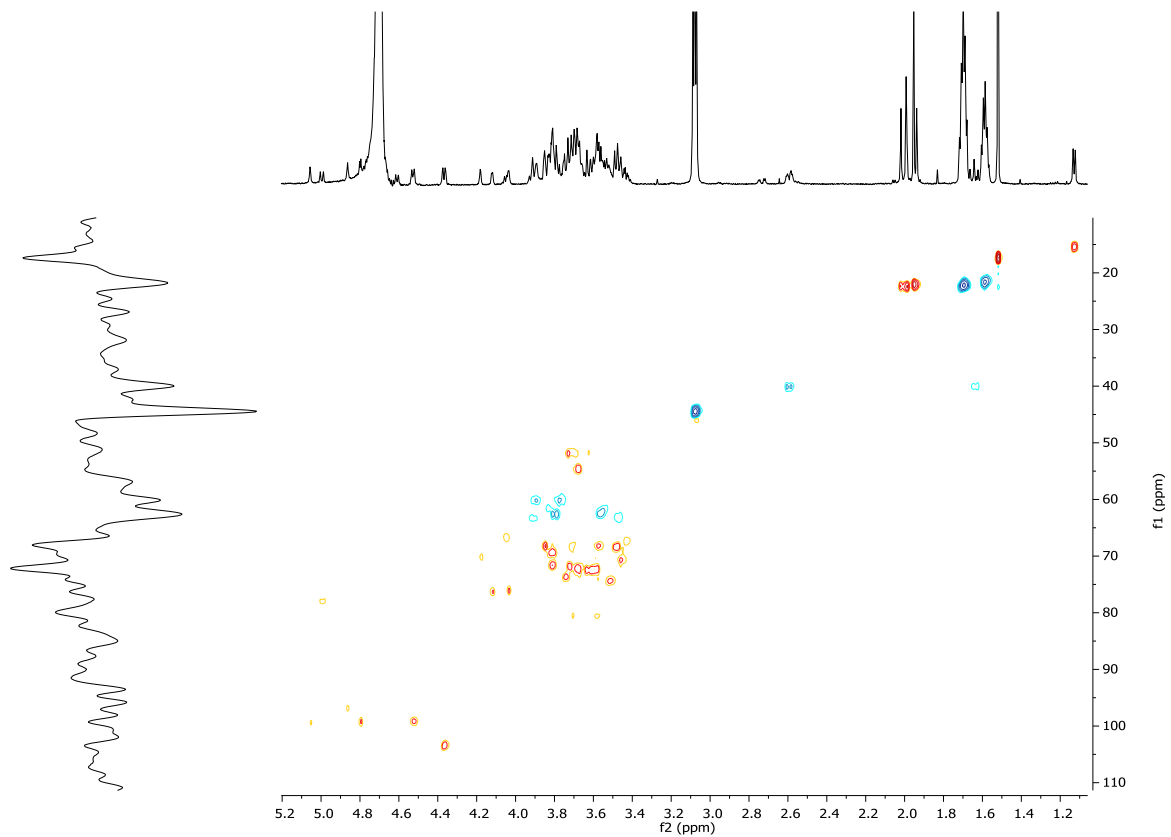

30

$^1\text{H}$  NMR ( $\text{D}_2\text{O}$ , 600M Hz)

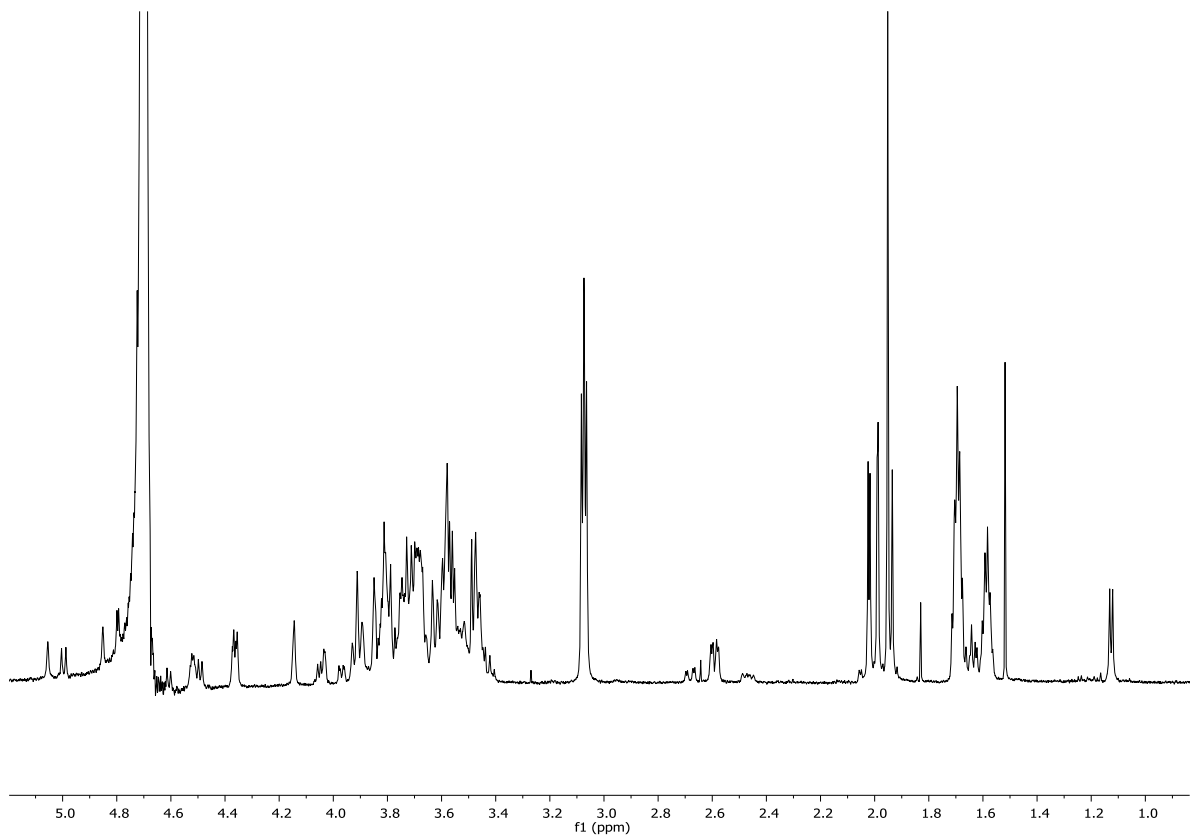

$^1\text{H}$ - $^1\text{H}$  COSY ( $\text{D}_2\text{O}$ , 600M Hz)

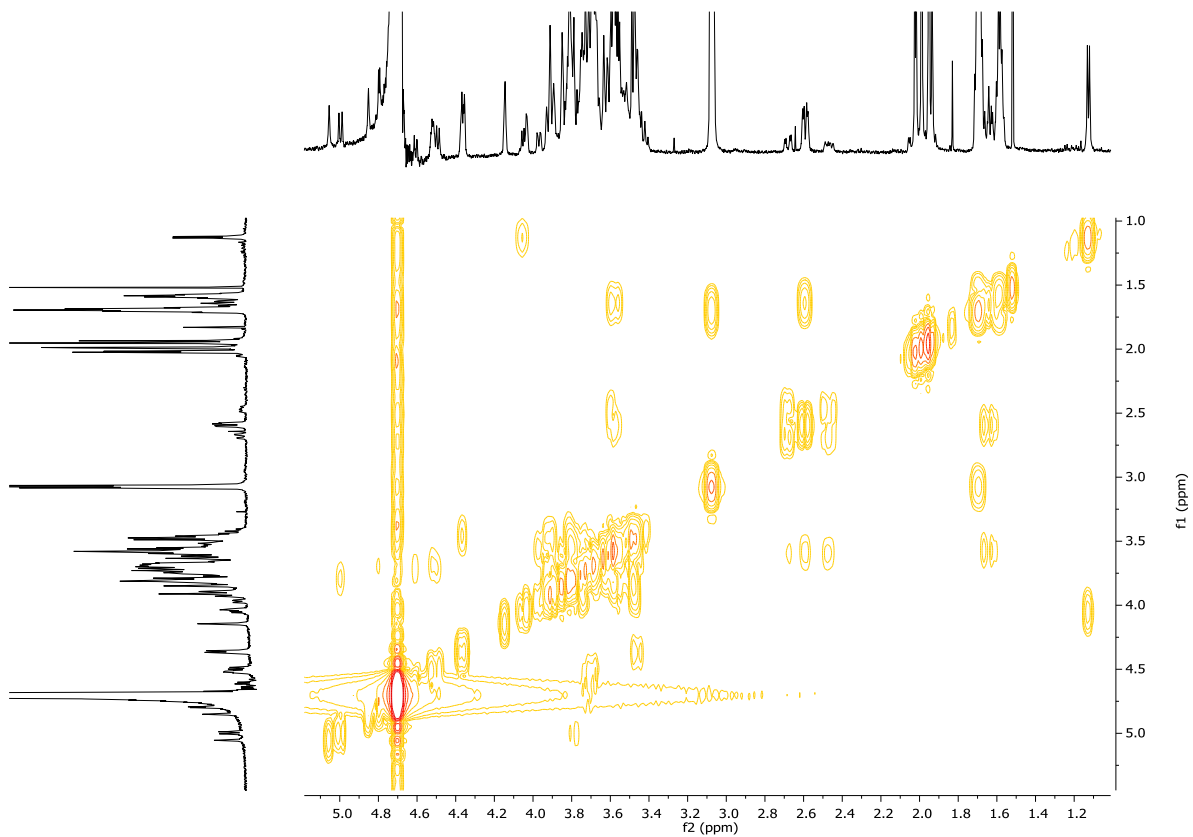

$^1\text{H}$ - $^1\text{H}$  TCOZY ( $\text{D}_2\text{O}$ , 600M Hz)

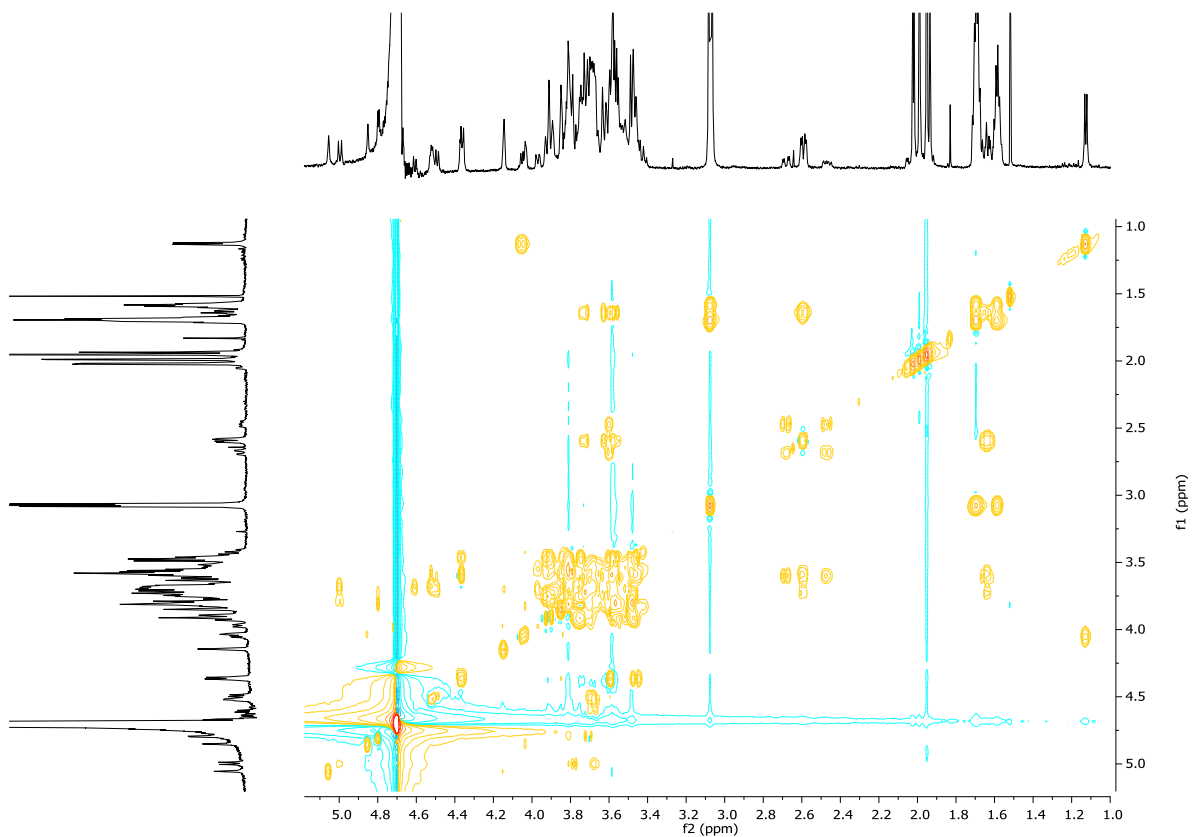

$^1\text{H}$ - $^{13}\text{C}$  HSQC ( $\text{D}_2\text{O}$ , 600M Hz)

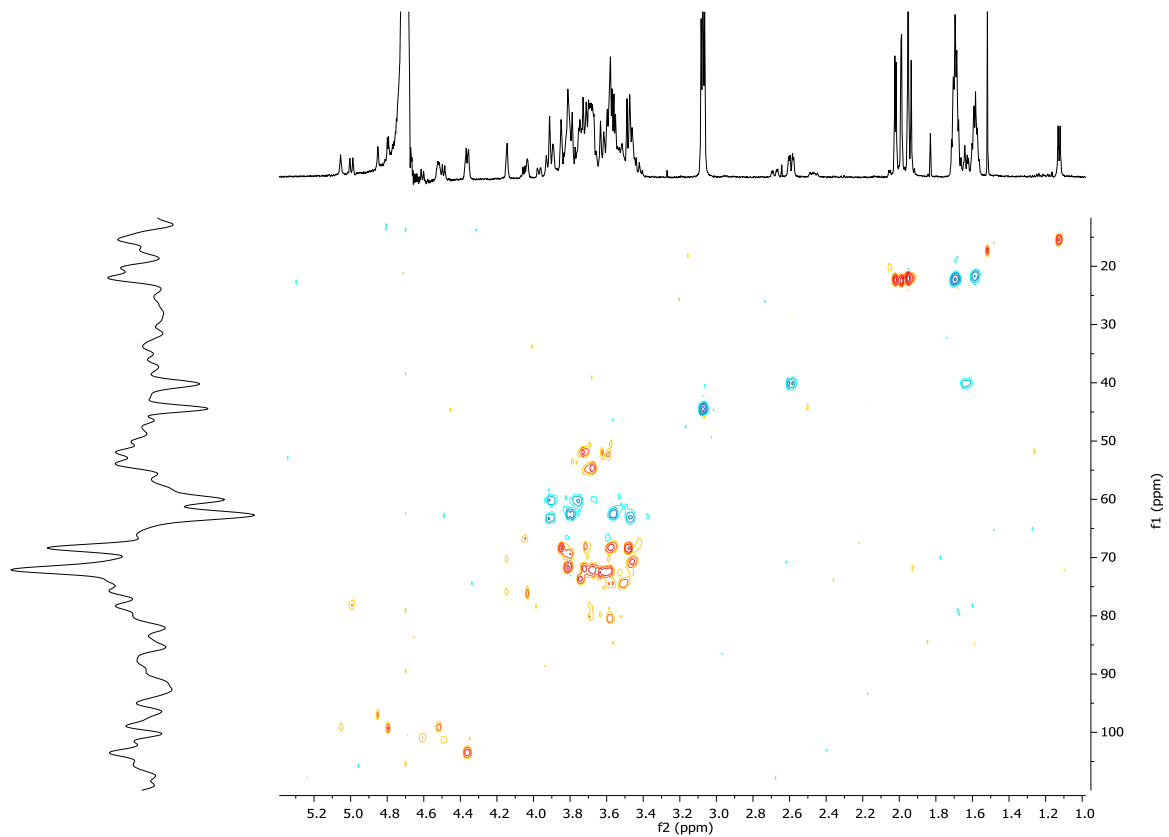

31

$^1\text{H}$  NMR ( $\text{D}_2\text{O}$ , 600M Hz)

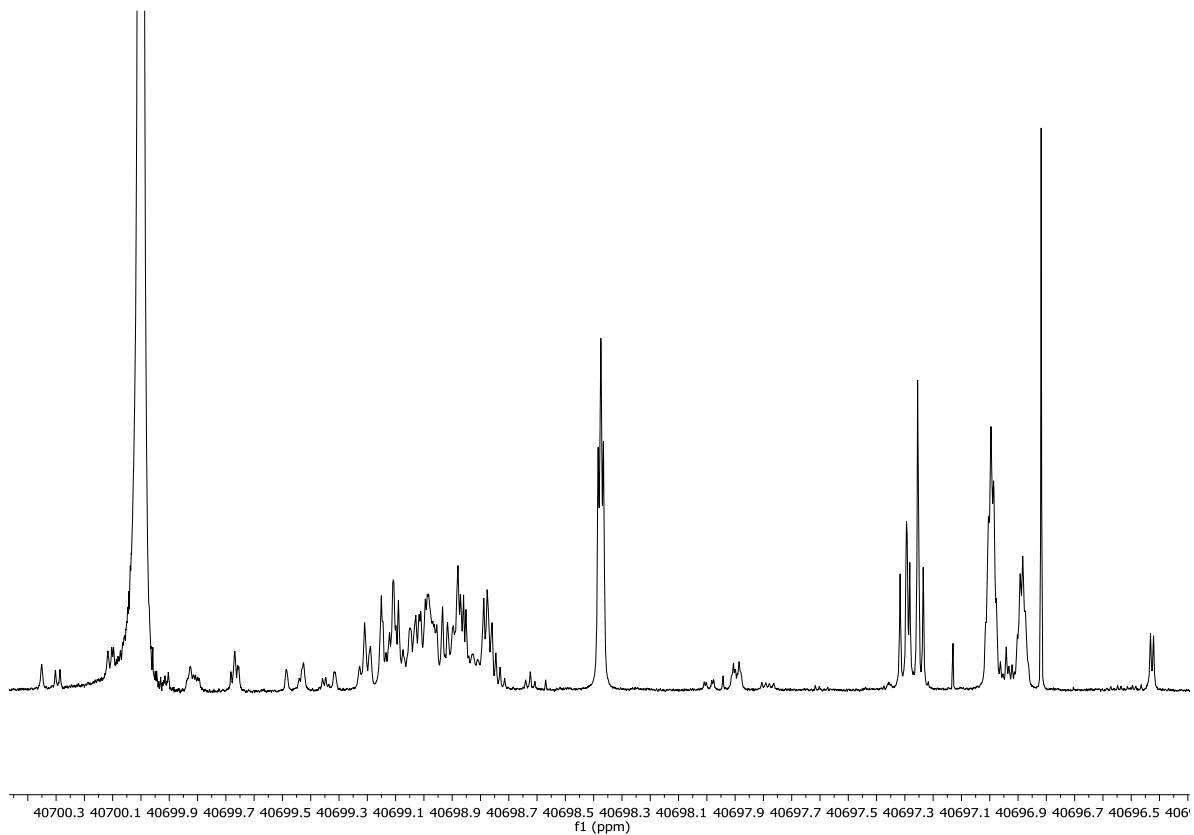

$^1\text{H}$ - $^1\text{H}$  COSY ( $\text{D}_2\text{O}$ , 600M Hz)

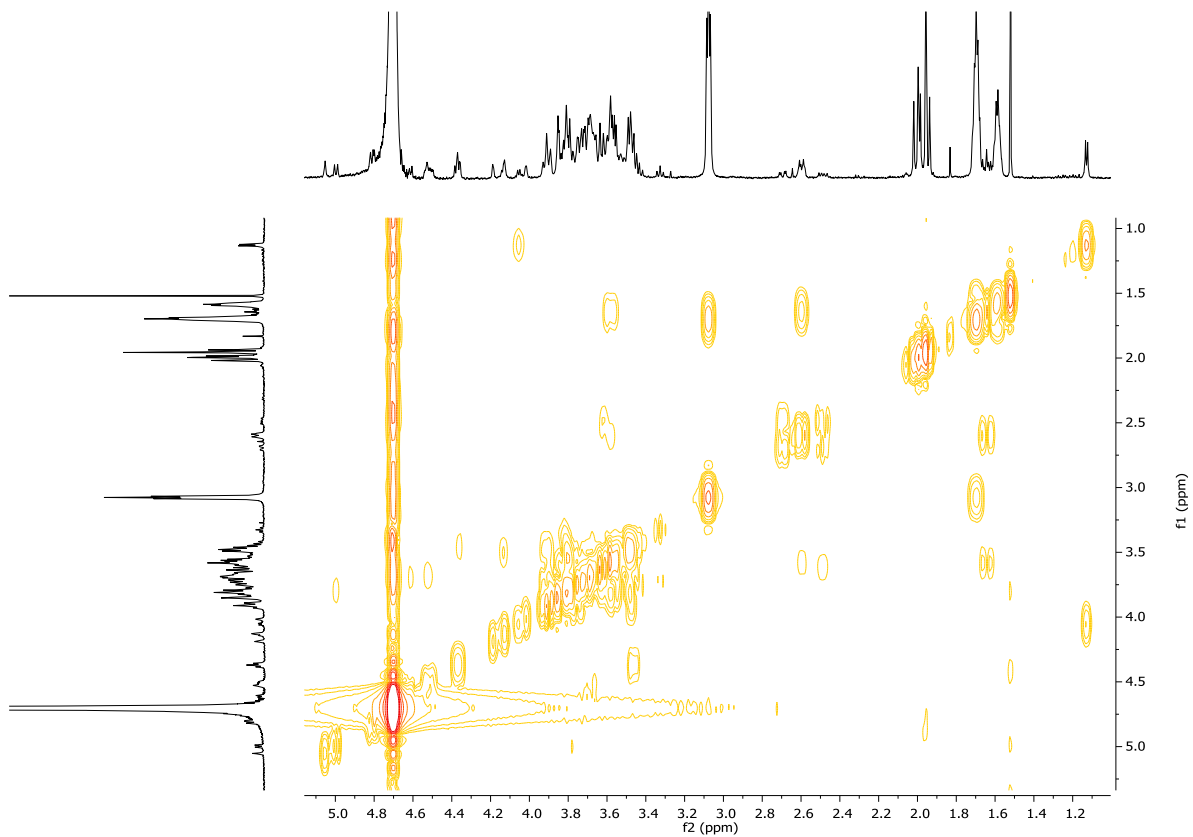

$^1\text{H}$ - $^1\text{H}$  TOSY ( $\text{D}_2\text{O}$ , 600M Hz)

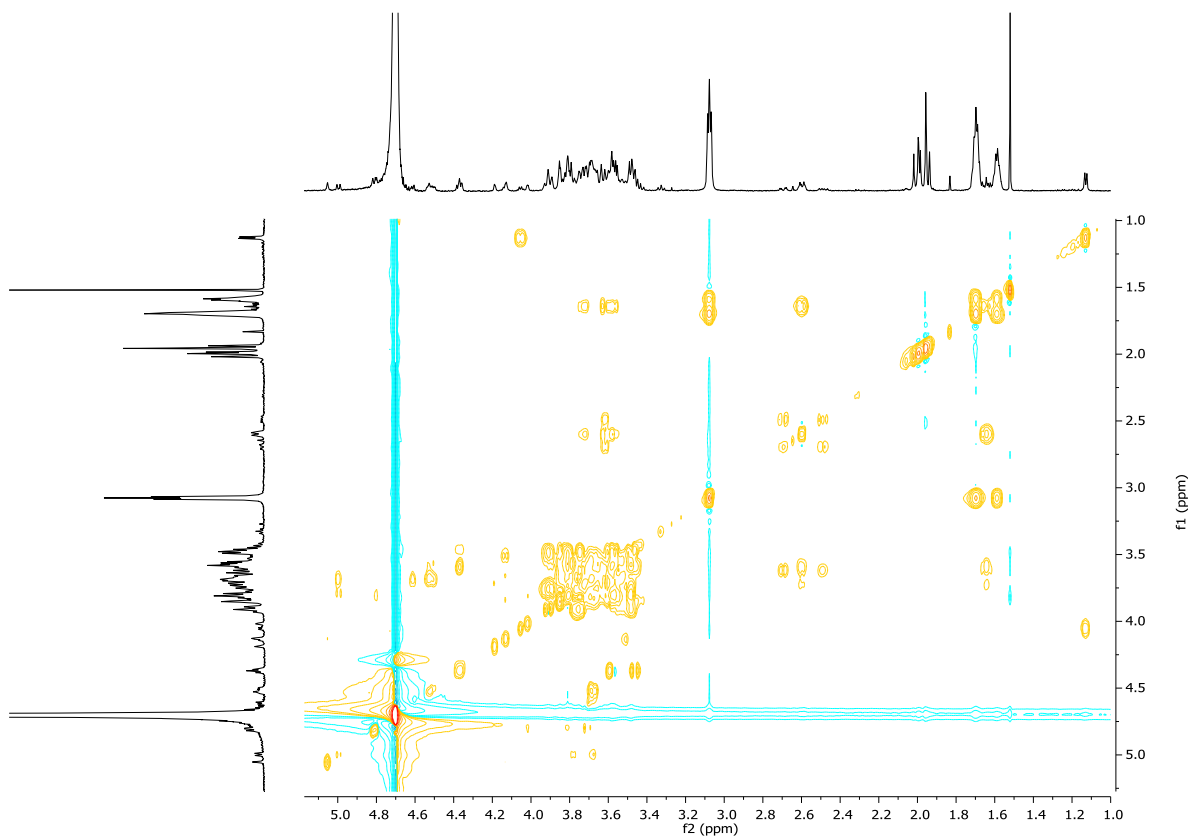

$^1\text{H}$ - $^{13}\text{C}$  HSQC ( $\text{D}_2\text{O}$ , 600M Hz)

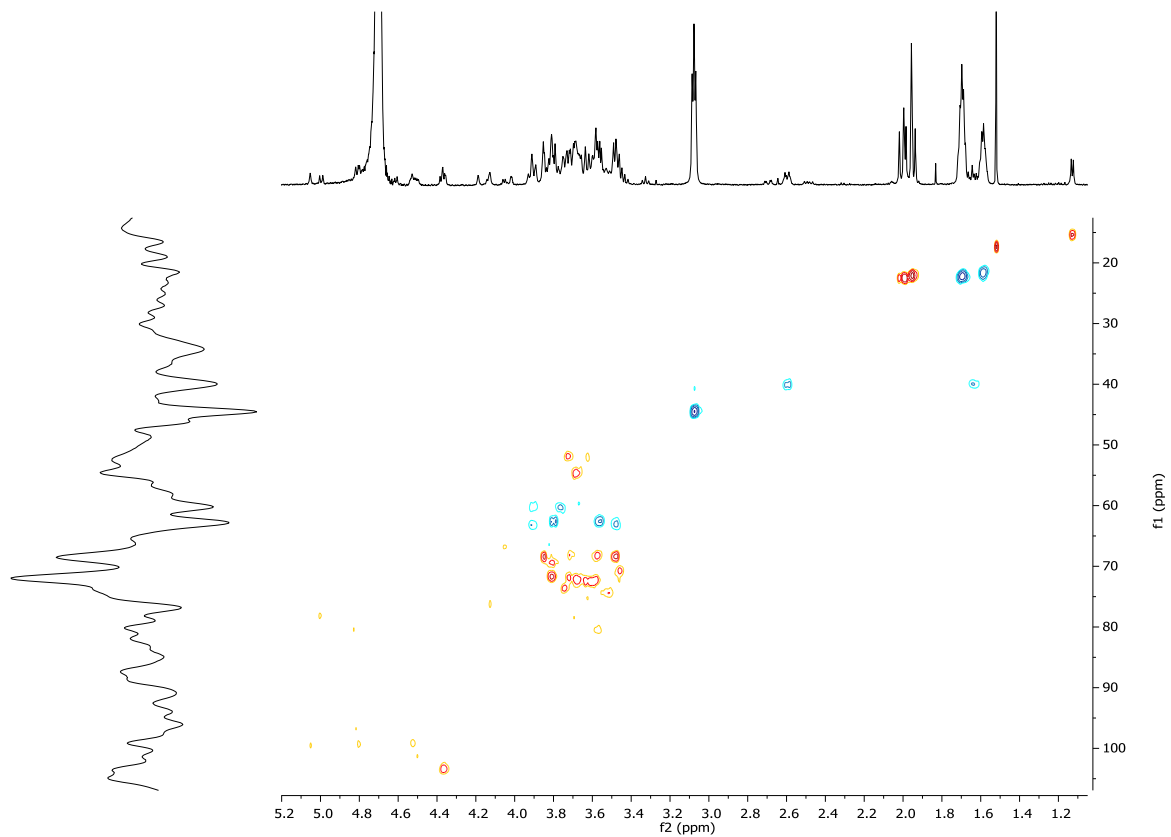

32

$^1\text{H}$  NMR ( $\text{D}_2\text{O}$ , 600M Hz)

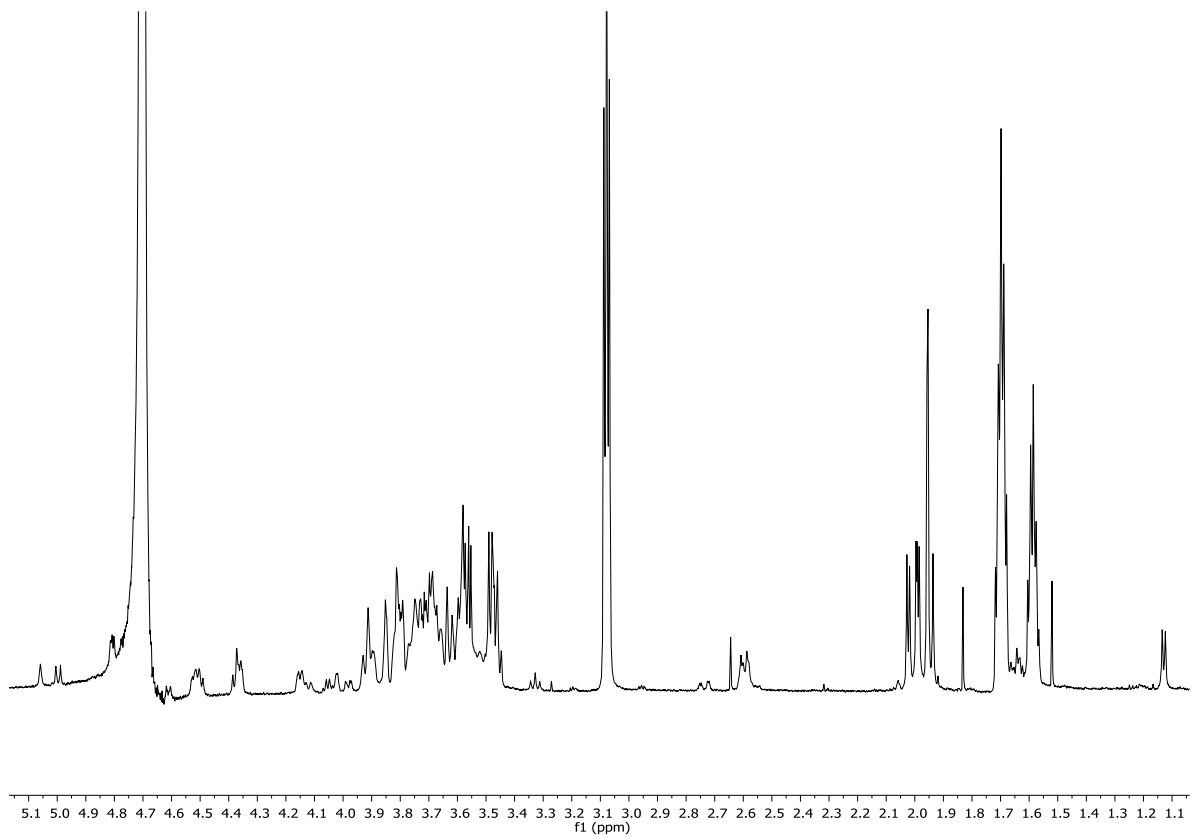



$^1\text{H}$ - $^1\text{H}$  COSY ( $\text{D}_2\text{O}$ , 600M Hz)

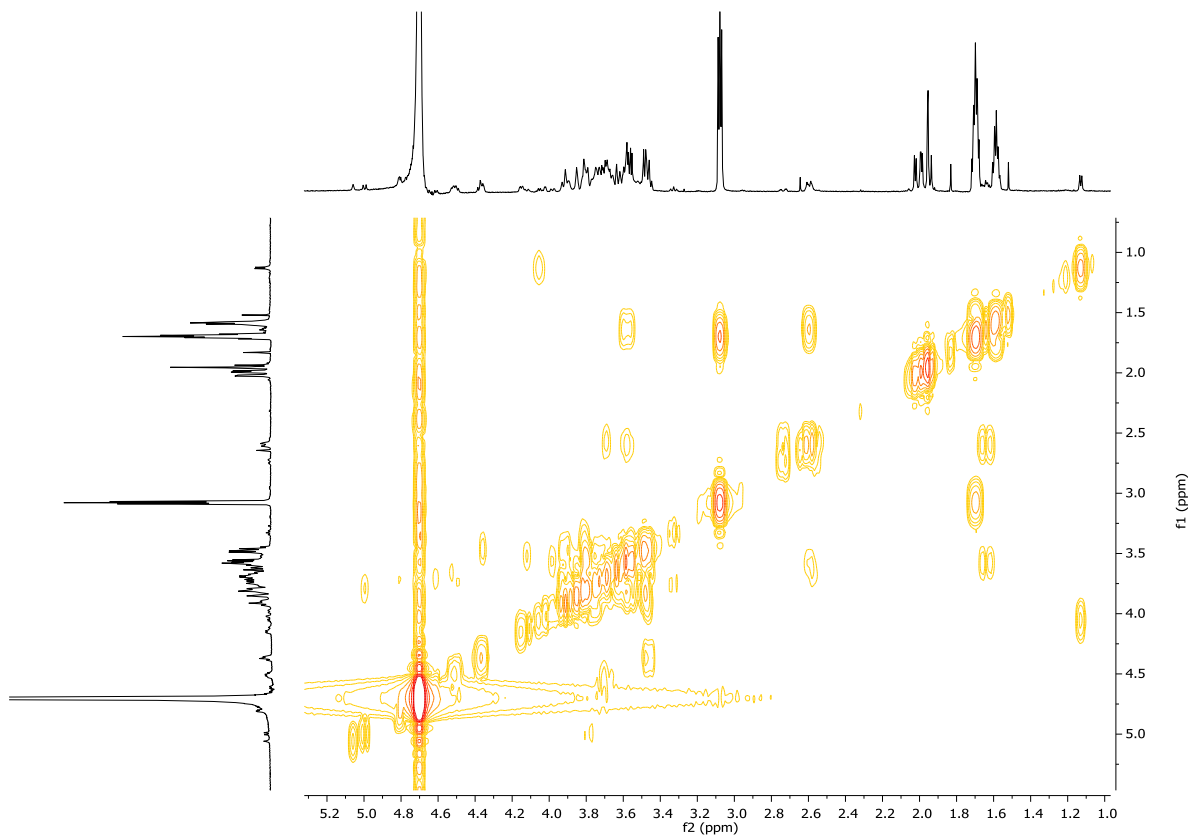

$^1\text{H}$ - $^1\text{H}$  TROSY ( $\text{D}_2\text{O}$ , 600M Hz)

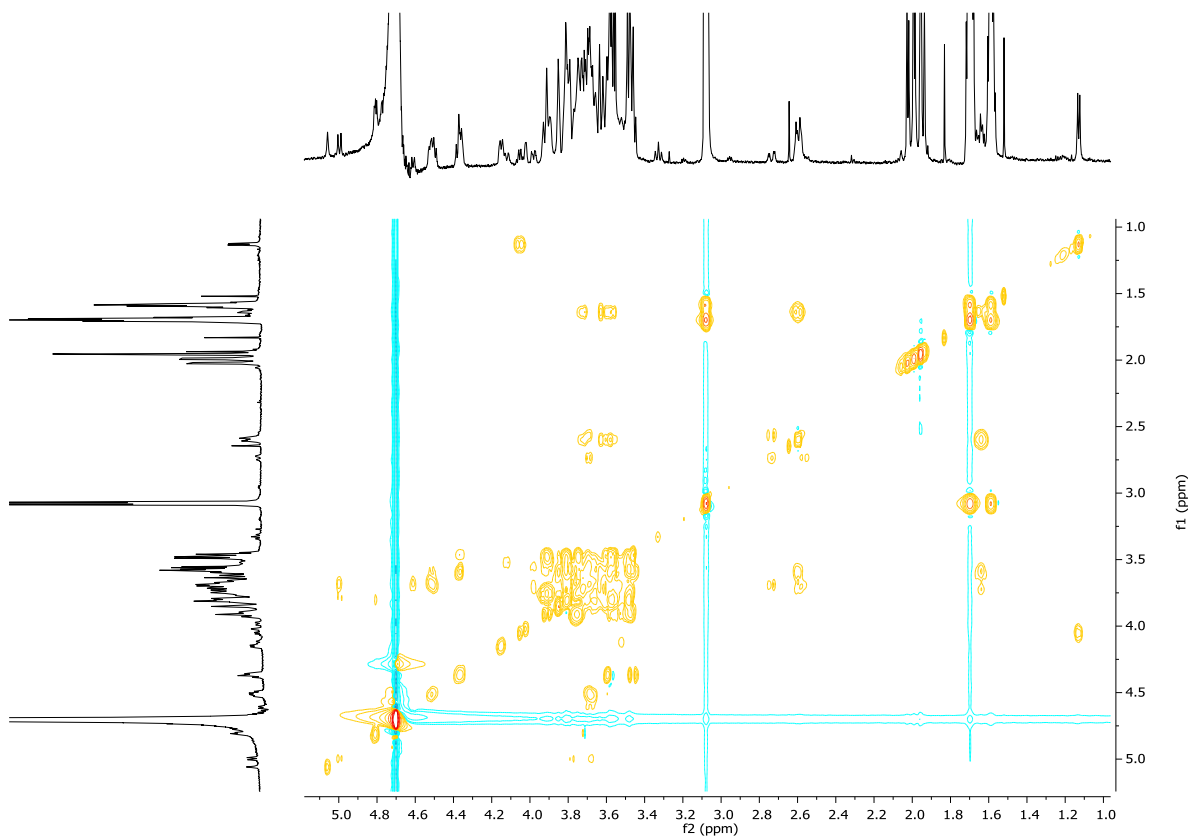

$^1\text{H}$ - $^{13}\text{C}$  HSQC ( $\text{D}_2\text{O}$ , 600M Hz)

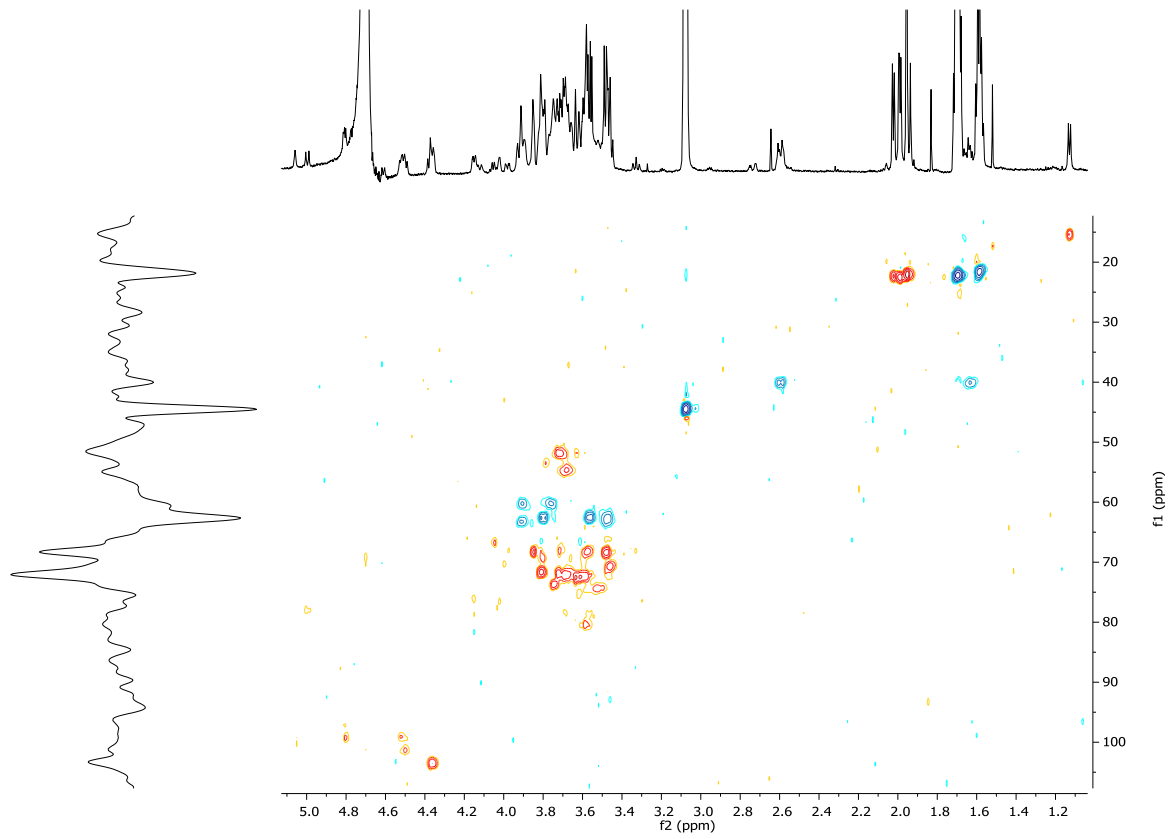

Supplement: NIHMS1638514-supplement-Gao_supplementary_materials-_NMR.pdf [file NIHMS1638514-supplement-Gao_supplementary_materials-_NMR.pdf]
